# Supplementary material for: Metabolite Genome-Wide Association Study (mGWAS) and Gene-Metabolite Interaction Network Analysis Reveal Potential Biomarkers for Feed Efficiency in Pigs
Source: PubMed Central journal article supplement (PMC7281523; doi:10.3390/metabo10050201), 2020-05-15
Supplement: metabolites-10-00201-s001.pdf [file metabolites-10-00201-s001.pdf]

**Supplementary Table S1.** All the significant SNPs of genome-wide association with chromosome, position, and *p*-value information for metabolites from first, second, and combined two sampling times.

| Significant SNP Name | Refsnp (Rs) Number | Chromosome | Annotation By Porcine Refseq Database (Sscrofa10.2/Susscr3) |                               |                        | Annotation By Porcine Refseq Database (Sscrofa11.1/Susscr11) |                               |                        | Associated Metabolite Number | Metabolite From First Sampling Time ( <i>p</i> -Value) | Metabolite From Second Sampling Time ( <i>p</i> -Value) | Metabolite From Combined Two Sampling Times ( <i>p</i> -Value) |
|----------------------|--------------------|------------|-------------------------------------------------------------|-------------------------------|------------------------|--------------------------------------------------------------|-------------------------------|------------------------|------------------------------|--------------------------------------------------------|---------------------------------------------------------|----------------------------------------------------------------|
|                      |                    |            | Position                                                    | Nearest gene                  | Distance               | Position                                                     | Nearest gene <sup>#</sup>     | Distance <sup>#</sup>  |                              |                                                        |                                                         |                                                                |
| 18_2566820           | NA                 | 18         | 2566820                                                     | <i>SHH</i> (NM_001244513)     | 97973                  | NA                                                           | NA                            | NA                     | 1                            | NA                                                     | Aspartic acid (2.29 × 10 <sup>-7</sup> )                | NA                                                             |
| 2_29041727           | NA                 | 2          | 29041727                                                    | <i>CAT</i> (NM_214301)        | 140893                 | NA                                                           | NA                            | NA                     | 1                            | NA                                                     | Nicotine amide (4.71 × 10 <sup>-7</sup> )               | NA                                                             |
| 3_118102178          | NA                 | 3          | 118102178                                                   | <i>RBKS</i> (NM_001315776)    | 172300                 | NA                                                           | NA                            | NA                     | 1                            | NA                                                     | Aspartic acid (2.29 × 10 <sup>-7</sup> )                | NA                                                             |
| ALGA0000375          | rs80848743         | 1          | 5395131                                                     | NA                            | NA                     | 4048051                                                      | NA                            | NA                     | 1                            | NA                                                     | Isoleucyl proline (3.57 × 10 <sup>-7</sup> )            | NA                                                             |
| ALGA0014130          | rs81360281         | 2          | 86940572                                                    | <i>F2R</i> (NM_001244372)     | 339212                 | 85318127                                                     | <i>F2R</i> (NM_001244372)     | 324666                 | 1                            | Pyruvic acid (1.25 × 10 <sup>-7</sup> )                | NA                                                      | NA                                                             |
| ALGA0043837          | rs80954663         | 7          | 100079759                                                   | <i>SYNJ2BP</i> (NM_001244991) | 149115                 | 93767736                                                     | <i>SYNJ2BP</i> (NM_001244991) | 141467                 | 1                            | NA                                                     | Isoleucyl proline (3.57 × 10 <sup>-7</sup> )            | NA                                                             |
| ALGA0046501          | rs81402045         | 8          | 12844147                                                    | <i>LCORL</i> (NM_001195345)   | 78106                  | 13047394                                                     | <i>LCORL</i> (NM_001195345)   | 78259                  | 1                            | NA                                                     | Isoleucyl proline (3.57 × 10 <sup>-7</sup> )            | NA                                                             |
| ALGA0046512          | rs81402401         | 8          | 13111033                                                    | <i>LCORL</i> (NM_001195345)   | 344992                 | 13253758                                                     | <i>LCORL</i> (NM_001195345)   | 284623                 | 1                            | NA                                                     | Isoleucyl proline (3.57 × 10 <sup>-7</sup> )            | NA                                                             |
| ALGA0049375          | rs81403821         | 8          | 127824811                                                   | <i>NFKB1</i> (NM_001048232)   | 160810                 | 118606542                                                    | <i>NFKB1</i> (NM_001048232)   | 127615                 | 1                            | Pyruvic acid (7.57 × 10 <sup>-7</sup> )                | NA                                                      | NA                                                             |
| ALGA0049385          | rs81403842         | 8          | 127976364                                                   | <i>NFKB1</i> (NM_001048232)   | 312363                 | 118693613                                                    | <i>NFKB1</i> (NM_001048232)   | 214686                 | 1                            | Pyruvic acid (7.57 × 10 <sup>-7</sup> )                | NA                                                      | NA                                                             |
| ALGA0061605          | rs80965301         | 11         | 26591544                                                    | <i>MTRF1</i> (NM_001243580)   | 5 <sup>th</sup> intron | 25626653                                                     | <i>MTRF1</i> (NM_001243580)   | 9 <sup>th</sup> intron | 1                            | NA                                                     | Aspartic acid (2.29 × 10 <sup>-7</sup> )                | NA                                                             |

|             |                |    |               |                                    |        |               |                                    |        |   |                                                                               |                                                                               |                                              |
|-------------|----------------|----|---------------|------------------------------------|--------|---------------|------------------------------------|--------|---|-------------------------------------------------------------------------------|-------------------------------------------------------------------------------|----------------------------------------------|
| ALGA0072779 | rs8144930<br>0 | 13 | 1779817<br>32 | <i>EPHA3</i><br>(NM_0011953<br>35) | 171617 | 1671140<br>56 | <i>EPHA3</i><br>(NM_0011953<br>35) | 171417 | 1 | Cotinine (4.18<br>$\times 10^{-9}$ )                                          | NA                                                                            | NA                                           |
| ALGA0083708 | rs8078989<br>4 | 15 | 2069154       | NA                                 | NA     | 2636979       | NA                                 | NA     | 1 | NA                                                                            | Guanine (1.63<br>$\times 10^{-7}$ )                                           | NA                                           |
| ALGA0104701 | rs8147930<br>7 | 17 | 8537481       | NA                                 | NA     | 7658710       | NA                                 | NA     | 1 | NA                                                                            | Guanine (8.32<br>$\times 10^{-8}$ )                                           | NA                                           |
| ASGA0040302 | rs8140535<br>8 | 8  | 1431277<br>78 | <i>CDS1</i><br>(NM_0010445<br>34)  | 312027 | 1336481<br>03 | <i>CDS1</i><br>(NM_0010445<br>34)  | 313671 | 1 | 1-Hexadecyl-<br>sn-glycero-3-<br>phosphocholin<br>e ( $7.02 \times 10^{-7}$ ) | NA                                                                            | NA                                           |
| ASGA0042433 | rs8140874<br>2 | 9  | 3482809<br>1  | NA                                 | NA     | 3076406<br>2  | NA                                 | NA     | 1 | Pyruvic acid<br>( $6.93 \times 10^{-7}$ )                                     | NA                                                                            | NA                                           |
| ASGA0042436 | rs8140874<br>8 | 9  | 3488382<br>4  | NA                                 | NA     | 3081973<br>8  | NA                                 | NA     | 1 | Pyruvic acid<br>( $6.93 \times 10^{-7}$ )                                     | NA                                                                            | NA                                           |
| ASGA0054868 | rs8143599<br>7 | 12 | 4991979<br>5  | <i>MIR212</i><br>(NR_128427)       | 96355  | 4806681<br>9  | <i>MIR132</i><br>(NR_128416)       | 95805  | 1 | NA                                                                            | Guanine (8.32<br>$\times 10^{-8}$ )                                           | NA                                           |
| ASGA0078611 | rs8146845<br>5 | 18 | 2676317       | <i>SHH</i><br>(NM_0012445<br>13)   | 2512   | 2557956       | <i>SHH</i><br>(NM_0012445<br>13)   | 2472   | 1 | NA                                                                            | Propionylcarni<br>tine ( $2.98 \times 10^{-7}$ )                              | NA                                           |
| ASGA0083287 | rs8133667<br>7 | 13 | 3868357       | <i>DPH3</i><br>(NM_0012436<br>16)  | 282233 | 3681442       | <i>DPH3</i><br>(NM_0012436<br>16)  | 285586 | 1 | Creatinine<br>( $4.79 \times 10^{-7}$ )                                       | NA                                                                            | NA                                           |
| ASGA0094610 | rs8131383<br>4 | 17 | 4830775<br>4  | NA                                 | NA     | 4301119<br>1  | NA                                 | NA     | 1 | LysoPC(16:0)<br>( $5.29 \times 10^{-7}$ )                                     | NA                                                                            | NA                                           |
| ASGA0095299 | rs8131465<br>3 | 5  | 8345580<br>3  | <i>TXNRD1</i><br>(NM_214154)       | 202024 | 8000958<br>8  | <i>TXNRD1</i><br>(NM_214154)       | 160745 | 1 | NA                                                                            | NA                                                                            | Monosaccharid<br>e ( $9.09 \times 10^{-7}$ ) |
| DRGA0004012 | NA             | 3  | 7170895<br>1  | <i>DOK1</i><br>(NM_0011437<br>05)  | 39335  | NA            | NA                                 | NA     | 1 | NA                                                                            | Propionylcarni<br>tine ( $7.66 \times 10^{-8}$ )                              | NA                                           |
| DRGA0008955 | NA             | 8  | 1430551<br>09 | <i>CDS1</i><br>(NM_0010445<br>34)  | 384696 | NA            | NA                                 | NA     | 1 | 1-Hexadecyl-<br>sn-glycero-3-<br>phosphocholin<br>e ( $7.02 \times 10^{-7}$ ) | NA                                                                            | NA                                           |
| H3GA0007606 | rs8136434<br>6 | 2  | 1324333<br>32 |                                    |        | 1270800<br>32 |                                    |        | 1 | Isovalerylcarni<br>tine ( $7.84 \times 10^{-7}$ )                             | NA                                                                            | NA                                           |
| H3GA0015652 | rs8094564<br>9 | 5  | 1070967<br>1  | <i>MIR9834</i><br>(NR_128521)      | 331400 | NA            | NA                                 | NA     | 1 | NA                                                                            | 1-Myristoyl-<br>sn-glycero-3-<br>phosphocholin<br>e ( $5.74 \times 10^{-9}$ ) | NA                                           |
| H3GA0026947 | rs8140874<br>4 | 9  | 3484180<br>8  | NA                                 | NA     | 3077775<br>5  | NA                                 | NA     | 1 | Pyruvic acid<br>( $6.93 \times 10^{-7}$ )                                     | NA                                                                            | NA                                           |

|                     |             |    |           |                                 |                           |           |                                 |                           |   |                                                                    |                                                                    |                                       |
|---------------------|-------------|----|-----------|---------------------------------|---------------------------|-----------|---------------------------------|---------------------------|---|--------------------------------------------------------------------|--------------------------------------------------------------------|---------------------------------------|
| H3GA0028115         | rs81416160  | 9  | 128659759 | NA                              | NA                        | 116973667 | NA                              | NA                        | 1 | NA                                                                 | Isoleucyl proline (3.57 × 10 <sup>-7</sup> )                       | NA                                    |
| H3GA0035928         | rs81443958  | 13 | 27911595  | <i>CTNNB1</i><br>(NM_214367)    | 244338                    | 25427151  | <i>CTNNB1</i><br>(NM_214367)    | 218840                    | 1 | NA                                                                 | Propionylcarnitine (5.78 × 10 <sup>-7</sup> )                      | NA                                    |
| H3GA0055935         | rs81477237  | 9  | 2349391   | NA                              | NA                        | 1973555   | NA                              | NA                        | 1 | NA                                                                 | Aspartic acid (2.29 × 10 <sup>-7</sup> )                           | NA                                    |
| INRA0031485         | rs345734573 | 9  | 34920723  | NA                              | NA                        | 30856635  | NA                              | NA                        | 1 | Pyruvic acid (6.93 × 10 <sup>-7</sup> )                            | NA                                                                 | NA                                    |
| M1GA0003090         | rs81364347  | 2  | 132449420 | NA                              | NA                        | 127096117 | NA                              | NA                        | 1 | Isovalerylcarnitine (7.84 × 10 <sup>-7</sup> )                     | NA                                                                 | NA                                    |
| M1GA0015335         | rs80873877  | 11 | 80613144  | NA                              | NA                        | 73179330  | NA                              | NA                        | 1 | Cotinine (4.18 × 10 <sup>-9</sup> )                                | NA                                                                 | NA                                    |
| MARC0001720         | rs81287225  | 9  | 0         | NA                              | NA                        | NA        | NA                              | NA                        | 1 | Pyruvic acid (6.93 × 10 <sup>-7</sup> )                            | NA                                                                 | NA                                    |
| MARC0010841         | rs80986455  | 5  | 10759678  | <i>MIR9834</i><br>(NR_128521)   | 381407                    | NA        | NA                              | NA                        | 1 | NA                                                                 | 1-Myristoyl-sn-glycero-3-phosphocholine (5.74 × 10 <sup>-9</sup> ) | NA                                    |
| MARC0023109         | rs80900706  | 14 | 149350120 | NA                              | NA                        | 137446913 | NA                              | NA                        | 1 | NA                                                                 | Pyruvic acid (1.07 × 10 <sup>-7</sup> )                            | NA                                    |
| MARC0027232         | rs80875525  | 17 | 48876667  | <i>ZHX3</i><br>(NM_001258405)   | 371390                    | 43476692  | <i>ZHX3</i><br>(NM_001258405)   | 377480                    | 1 | LysoPC(16:0) (5.29 × 10 <sup>-7</sup> )                            | NA                                                                 | NA                                    |
| MARC0040505         | rs81233629  | 9  | 50293805  | <i>FXYD2</i><br>(NM_001014427)  | 44876                     | 45214687  | <i>FXYD2</i><br>(NM_001014427)  | 44975                     | 1 | NA                                                                 | NA                                                                 | Citrulline (4.75 × 10 <sup>-7</sup> ) |
| MARC0060063         | rs81248931  | 8  | 142707308 | NA                              | NA                        | 133228051 | NA                              | NA                        | 1 | 1-Hexadecyl-sn-glycero-3-phosphocholine (7.02 × 10 <sup>-7</sup> ) | NA                                                                 | NA                                    |
| MARC0083382         | rs81266104  | 15 | 140091862 | NA                              | NA                        | 126592447 | NA                              | NA                        | 1 | NA                                                                 | Carnitine (2.40 × 10 <sup>-7</sup> )                               | NA                                    |
| MARC0092124         | rs80950563  | 9  | 34900287  | NA                              | NA                        | 30836201  | NA                              | NA                        | 1 | Pyruvic acid (6.93 × 10 <sup>-7</sup> )                            | NA                                                                 | NA                                    |
| MARC0110390         | rs81238710  | 2  | 83663964  | <i>SFXN1</i><br>(NM_001098602)  | 7 <sup>th</sup><br>intron | 82042106  | <i>SFXN1</i><br>(NM_001098602)  | 7 <sup>th</sup><br>intron | 1 | Pyruvic acid (1.25 × 10 <sup>-7</sup> )                            | NA                                                                 | NA                                    |
| WU_10.2_10_71866847 | rs324154547 | 10 | 71866847  | <i>AKR1C2</i><br>(NM_001044570) | 16292                     | 65613895  | <i>AKR1C2</i><br>(NM_001044570) | 16294                     | 1 | NA                                                                 | Propionylcarnitine (1.28 × 10 <sup>-7</sup> )                      | NA                                    |

|                      |             |    |           |                                  |        |           |                                  |        |   |                                                                    |                                              |    |
|----------------------|-------------|----|-----------|----------------------------------|--------|-----------|----------------------------------|--------|---|--------------------------------------------------------------------|----------------------------------------------|----|
| WU_10.2_12_495992    | rs340150298 | 12 | 49599992  | <i>INPP5K</i><br>(NM_001190292)  | 3831   | 47715327  | <i>INPP5K</i><br>(NM_001190292)  | 3829   | 1 | NA                                                                 | Guanine (8.32 × 10 <sup>-8</sup> )           | NA |
| WU_10.2_12_49979240  | rs81436012  | 12 | 49979240  | <i>MIR212</i><br>(NR_128427)     | 36910  | 48126255  | <i>MIR132</i><br>(NR_128416)     | 36369  | 1 | NA                                                                 | Guanine (8.32 × 10 <sup>-8</sup> )           | NA |
| WU_10.2_13_204594763 | rs319481912 | 13 | 204594763 | <i>CLDN8</i><br>(NM_001161646)   | 428133 | 194009692 | <i>CLDN8</i><br>(NM_001161646)   | 445602 | 1 | NA                                                                 | Isoleucyl proline (4.20 × 10 <sup>-7</sup> ) | NA |
| WU_10.2_13_204608919 | rs339019578 | 13 | 204608919 | <i>CLDN8</i><br>(NM_001161646)   | 442289 | 194023848 | <i>CLDN8</i><br>(NM_001161646)   | 459758 | 1 | NA                                                                 | Isoleucyl proline (4.20 × 10 <sup>-7</sup> ) | NA |
| WU_10.2_13_204631833 | rs334759865 | 13 | 204631833 | <i>CLDN8</i><br>(NM_001161646)   | 465203 | 194046757 | <i>CLDN8</i><br>(NM_001161646)   | 482667 | 1 | NA                                                                 | Isoleucyl proline (4.20 × 10 <sup>-7</sup> ) | NA |
| WU_10.2_17_48295280  | rs336874688 | 17 | 48295280  | NA                               | NA     | 42998719  | NA                               | NA     | 1 | LysoPC(16:0) (5.29 × 10 <sup>-7</sup> )                            | NA                                           | NA |
| WU_10.2_2_132463311  | rs332147841 | 2  | 132463311 | NA                               | NA     | 127110011 | NA                               | NA     | 1 | Isovalerylcarnitine (7.84 × 10 <sup>-7</sup> )                     | NA                                           | NA |
| WU_10.2_2_132503341  | rs324002124 | 2  | 132503341 | NA                               | NA     | 127150044 | NA                               | NA     | 1 | Isovalerylcarnitine (7.84 × 10 <sup>-7</sup> )                     | NA                                           | NA |
| WU_10.2_2_132570224  | rs341398921 | 2  | 132570224 | NA                               | NA     | 127217328 | NA                               | NA     | 1 | Isovalerylcarnitine (7.84 × 10 <sup>-7</sup> )                     | NA                                           | NA |
| WU_10.2_6_135312468  | rs337696797 | 6  | 135312468 | <i>LEPROT</i><br>(NM_001145388)  | 67384  | 146907252 | <i>LEPR</i><br>(NM_001024587)    | 40467  | 1 | 1-Hexadecyl-sn-glycero-3-phosphocholine (1.05 × 10 <sup>-6</sup> ) | NA                                           | NA |
| WU_10.2_7_100175430  | rs323081013 | 7  | 100175430 | <i>SYNJ2BP</i><br>(NM_001244991) | 53444  | 93863399  | <i>SYNJ2BP</i><br>(NM_001244991) | 45804  | 1 | NA                                                                 | Isoleucyl proline (3.57 × 10 <sup>-7</sup> ) | NA |
| WU_10.2_8_12998407   | rs318854532 | 8  | 12998407  | <i>LOCRL</i><br>(NM_001195345)   | 232366 | 13177356  | <i>LOCRL</i><br>(NM_001195345)   | 208221 | 1 | NA                                                                 | Isoleucyl proline (3.57 × 10 <sup>-7</sup> ) | NA |
| WU_10.2_8_142992366  | rs340936427 | 8  | 142992366 | <i>CDS1</i><br>(NM_001044534)    | 447439 | 133513075 | <i>CDS1</i><br>(NM_001044534)    | 448699 | 1 | 1-Hexadecyl-sn-glycero-3-phosphocholine (7.02 × 10 <sup>-7</sup> ) | NA                                           | NA |
| WU_10.2_9_128572226  | rs346382890 | 9  | 128572226 | NA                               | NA     | 116885399 | NA                               | NA     | 1 | NA                                                                 | Isoleucyl proline (3.57 × 10 <sup>-7</sup> ) | NA |

|                     |             |   |           |                                    |        |          |                                 |        |   |    |                                                                                                           |    |
|---------------------|-------------|---|-----------|------------------------------------|--------|----------|---------------------------------|--------|---|----|-----------------------------------------------------------------------------------------------------------|----|
| WU_10.2_X_104031384 | rs323531807 | X | 104031384 | NA                                 | NA     | 90474090 | <i>MIR652</i><br>(NR_049178)    | 307483 | 1 | NA | Lactic acid<br>( $3.14 \times 10^{-7}$ )                                                                  | NA |
| WU_10.2_X_37114281  | rs335077227 | X | 37114281  | <i>GP91-PHOX</i><br>(NM_214043)    | 253546 | 33462220 | <i>GP91-PHOX</i><br>(NM_214043) | 192435 | 1 | NA | 1-Hexadecyl-<br>sn-glycero-3-<br>phosphocholine<br>( $4.85 \times 10^{-9}$ )                              | NA |
| ALGA0003891         | rs80933223  | 1 | 69946212  | <i>LOC780435</i><br>(NM_001078684) | 226447 | 61964395 | NA                              | NA     | 2 | NA | Isovalerylcarni-<br>tine ( $2.79 \times 10^{-8}$ ),<br>Propionylcarni-<br>tine ( $8.32 \times 10^{-10}$ ) | NA |
| ALGA0003900         | rs80977812  | 1 | 70712755  | NA                                 | NA     | 62583607 | NA                              | NA     | 2 | NA | Isovalerylcarni-<br>tine ( $2.79 \times 10^{-8}$ ),<br>Propionylcarni-<br>tine ( $8.32 \times 10^{-10}$ ) | NA |
| ALGA0003935         | rs80997522  | 1 | 72365650  | <i>FHL5</i><br>(NM_001243314)      | 244726 | 63996109 | <i>FHL5</i><br>(NM_001243314)   | 243959 | 2 | NA | Isovalerylcarni-<br>tine ( $2.79 \times 10^{-8}$ ),<br>Propionylcarni-<br>tine ( $8.32 \times 10^{-10}$ ) | NA |
| ALGA0003952         | rs80995170  | 1 | 72982828  | NA                                 | NA     | 64614854 | NA                              | NA     | 2 | NA | Isovalerylcarni-<br>tine ( $2.79 \times 10^{-8}$ ),<br>Propionylcarni-<br>tine ( $8.32 \times 10^{-10}$ ) | NA |
| ALGA0003953         | rs80996334  | 1 | 73100657  | NA                                 | NA     | 64674794 | NA                              | NA     | 2 | NA | Isovalerylcarni-<br>tine ( $2.79 \times 10^{-8}$ ),<br>Propionylcarni-<br>tine ( $8.32 \times 10^{-10}$ ) | NA |
| ALGA0003995         | rs80857181  | 1 | 74410201  | <i>FBXL4</i><br>(NM_001171752)     | 12232  | 65859940 | <i>FBXL4</i><br>(NM_001171752)  | 12232  | 2 | NA | Isovalerylcarni-<br>tine ( $2.79 \times 10^{-8}$ ),<br>Propionylcarni-<br>tine ( $8.32 \times 10^{-10}$ ) | NA |

|             |                |   |              |                                    |                           |              |                                    |                           |   |    |                                                                                                                 |    |
|-------------|----------------|---|--------------|------------------------------------|---------------------------|--------------|------------------------------------|---------------------------|---|----|-----------------------------------------------------------------------------------------------------------------|----|
| ALGA0004000 | rs8089202<br>6 | 1 | 7446728<br>5 | <i>FBXL4</i><br>(NM_0011717<br>52) | 6 <sup>th</sup><br>intron | 6591813<br>3 | <i>FBXL4</i><br>(NM_0011717<br>52) | 6 <sup>th</sup><br>intron | 2 | NA | Isovalerylcarni<br>tine (2.79 ×<br>10 <sup>-8</sup> ),<br>Propionylcarni<br>tine (8.32 ×<br>10 <sup>-10</sup> ) | NA |
| ALGA0004002 | rs8091536<br>4 | 1 | 7450275<br>1 | <i>FBXL4</i><br>(NM_0011717<br>52) | 32524                     | 6595359<br>8 | <i>FBXL4</i><br>(NM_0011717<br>52) | 32523                     | 2 | NA | Isovalerylcarni<br>tine (2.79 ×<br>10 <sup>-8</sup> ),<br>Propionylcarni<br>tine (8.32 ×<br>10 <sup>-10</sup> ) | NA |
| ALGA0004005 | rs8088252<br>7 | 1 | 7458383<br>3 | <i>FBXL4</i><br>(NM_0011717<br>52) | 113606                    | 6603468<br>6 | <i>FBXL4</i><br>(NM_0011717<br>52) | 113611                    | 2 | NA | Isovalerylcarni<br>tine (2.79 ×<br>10 <sup>-8</sup> ),<br>Propionylcarni<br>tine (8.32 ×<br>10 <sup>-10</sup> ) | NA |
| ALGA0004006 | rs8082172<br>3 | 1 | 7459731<br>8 | <i>FBXL4</i><br>(NM_0011717<br>52) | 127091                    | 6604798<br>4 | <i>FBXL4</i><br>(NM_0011717<br>52) | 126909                    | 2 | NA | Isovalerylcarni<br>tine (2.79 ×<br>10 <sup>-8</sup> ),<br>Propionylcarni<br>tine (8.32 ×<br>10 <sup>-10</sup> ) | NA |
| ALGA0004024 | rs8093253<br>4 | 1 | 7491612<br>7 | <i>PNISR</i><br>(NM_0011134<br>39) | 79963                     | 6620930<br>3 | <i>PNISR</i><br>(NM_0011134<br>39) | 141665                    | 2 | NA | Isovalerylcarni<br>tine (2.79 ×<br>10 <sup>-8</sup> ),<br>Propionylcarni<br>tine (8.32 ×<br>10 <sup>-10</sup> ) | NA |
| ALGA0004041 | rs8097104<br>1 | 1 | 7515187<br>0 | <i>CCNC</i><br>(NM_0011901<br>60)  | 1 <sup>st</sup><br>intron | 6647514<br>7 | <i>CCNC</i><br>(NM_0011901<br>60)  | 1 <sup>st</sup><br>intron | 2 | NA | Isovalerylcarni<br>tine (2.79 ×<br>10 <sup>-8</sup> ),<br>Propionylcarni<br>tine (8.32 ×<br>10 <sup>-10</sup> ) | NA |
| ALGA0004042 | rs8082788<br>3 | 1 | 7516742<br>6 | <i>CCNC</i><br>(NM_0011901<br>60)  | 9 <sup>th</sup><br>intron | 6649111<br>5 | <i>CCNC</i><br>(NM_0011901<br>60)  | 8 <sup>th</sup><br>intron | 2 | NA | Isovalerylcarni<br>tine (2.79 ×<br>10 <sup>-8</sup> ),<br>Propionylcarni<br>tine (8.32 ×<br>10 <sup>-10</sup> ) | NA |

|             |                |   |              |                             |        |              |                             |        |   |    |                                                                                                                 |    |
|-------------|----------------|---|--------------|-----------------------------|--------|--------------|-----------------------------|--------|---|----|-----------------------------------------------------------------------------------------------------------------|----|
| ALGA0004046 | rs8135459<br>8 | 1 | 7521960<br>2 | CCNC<br>(NM_0011901<br>60)  | 44247  | 6654328<br>7 | CCNC<br>(NM_0011901<br>60)  | 44243  | 2 | NA | Isovalerylcarni<br>tine (2.79 ×<br>10 <sup>-8</sup> ),<br>Propionylcarni<br>tine (8.32 ×<br>10 <sup>-10</sup> ) | NA |
| ALGA0004048 | rs8082157<br>9 | 1 | 7539801<br>2 | MCHR2<br>(NM_0010446<br>09) | 165694 | 6659091<br>5 | CCNC<br>(NM_0011901<br>60)  | 91871  | 2 | NA | Isovalerylcarni<br>tine (2.79 ×<br>10 <sup>-8</sup> ),<br>Propionylcarni<br>tine (8.32 ×<br>10 <sup>-10</sup> ) | NA |
| ALGA0004073 | rs8135462<br>5 | 1 | 7574959<br>5 | MCHR2<br>(NM_0010446<br>09) | 167075 | 6694976<br>8 | MCHR2<br>(NM_0010446<br>09) | 92821  | 2 | NA | Isovalerylcarni<br>tine (2.79 ×<br>10 <sup>-8</sup> ),<br>Propionylcarni<br>tine (8.32 ×<br>10 <sup>-10</sup> ) | NA |
| ALGA0004090 | rs8089803<br>9 | 1 | 7613664<br>1 | SIM1<br>(NM_0011725<br>85)  | 65411  | 6736088<br>8 | SIM1<br>(NM_0011725<br>85)  | 67752  | 2 | NA | Isovalerylcarni<br>tine (2.79 ×<br>10 <sup>-8</sup> ),<br>Propionylcarni<br>tine (8.32 ×<br>10 <sup>-10</sup> ) | NA |
| ALGA0004093 | rs8135464<br>9 | 1 | 7634022<br>4 | SIM1<br>(NM_0011725<br>85)  | 268994 | 6764119<br>5 | SIM1<br>(NM_0011725<br>85)  | 348059 | 2 | NA | Isovalerylcarni<br>tine (2.79 ×<br>10 <sup>-8</sup> ),<br>Propionylcarni<br>tine (8.32 ×<br>10 <sup>-10</sup> ) | NA |
| ALGA0004143 | rs8089789<br>3 | 1 | 7732535<br>1 | NA                          | NA     | 6844751<br>5 | NA                          | NA     | 2 | NA | Isovalerylcarni<br>tine (2.79 ×<br>10 <sup>-8</sup> ),<br>Propionylcarni<br>tine (8.32 ×<br>10 <sup>-10</sup> ) | NA |
| ALGA0004148 | rs8135469<br>3 | 1 | 7751836<br>5 | NA                          | NA     | 6864277<br>9 | NA                          | NA     | 2 | NA | Isovalerylcarni<br>tine (2.79 ×<br>10 <sup>-8</sup> ),<br>Propionylcarni<br>tine (8.32 ×<br>10 <sup>-10</sup> ) | NA |

|             |                |    |               |                                 |       |               |                            |       |   |                                                       |                                                                                                                 |                                                       |
|-------------|----------------|----|---------------|---------------------------------|-------|---------------|----------------------------|-------|---|-------------------------------------------------------|-----------------------------------------------------------------------------------------------------------------|-------------------------------------------------------|
| ALGA0004169 | rs8083152<br>2 | 1  | 7802103<br>0  | NA                              | NA    | 6903575<br>0  | NA                         | NA    | 2 | NA                                                    | Isovalerylcarni<br>tine (2.79 ×<br>10 <sup>-8</sup> ),<br>Propionylcarni<br>tine (8.32 ×<br>10 <sup>-10</sup> ) | NA                                                    |
| ALGA0004173 | rs8135471<br>1 | 1  | 7823345<br>7  | NA                              | NA    | 6919650<br>3  | NA                         | NA    | 2 | NA                                                    | Isovalerylcarni<br>tine (2.79 ×<br>10 <sup>-8</sup> ),<br>Propionylcarni<br>tine (8.32 ×<br>10 <sup>-10</sup> ) | NA                                                    |
| ALGA0004177 | rs8135472<br>1 | 1  | 7838944<br>1  | NA                              | NA    | 6941942<br>0  | NA                         | NA    | 2 | NA                                                    | Isovalerylcarni<br>tine (2.79 ×<br>10 <sup>-8</sup> ),<br>Propionylcarni<br>tine (8.32 ×<br>10 <sup>-10</sup> ) | NA                                                    |
| ALGA0028664 | rs8078259<br>5 | 4  | 1295392<br>93 | RTCA<br>(NM_0012434<br>70)      | 35897 | 1179122<br>09 | RTCA<br>(NM_0012434<br>70) | 36536 | 2 | NA                                                    | Glutamic acid<br>(3.57 × 10 <sup>-10</sup> )                                                                    | Glutamic acid<br>(4.80 × 10 <sup>-8</sup> )           |
| ALGA0103368 | rs8133034<br>5 | 15 | 1501748<br>62 | NA                              | NA    | 1357389<br>84 | NA                         | NA    | 2 | Isovalerylcarni<br>tine (9.57 ×<br>10 <sup>-8</sup> ) | NA                                                                                                              | Isovalerylcarni<br>tine (4.19 ×<br>10 <sup>-7</sup> ) |
| ASGA0003182 | rs8135447<br>1 | 1  | 6978172<br>3  | LOC780435<br>(NM_0010786<br>84) | 61958 | 6188524<br>5  | NA                         | NA    | 2 | NA                                                    | Isovalerylcarni<br>tine (2.79 ×<br>10 <sup>-8</sup> ),<br>Propionylcarni<br>tine (8.32 ×<br>10 <sup>-10</sup> ) | NA                                                    |
| ASGA0003194 | rs8086869<br>2 | 1  | 7095069<br>2  | NA                              | NA    | 6281172<br>9  | NA                         | NA    | 2 | NA                                                    | Isovalerylcarni<br>tine (2.79 ×<br>10 <sup>-8</sup> ),<br>Propionylcarni<br>tine (8.32 ×<br>10 <sup>-10</sup> ) | NA                                                    |
| ASGA0003235 | rs8078884<br>6 | 1  | 7352035<br>4  | NA                              | NA    | 6497811<br>7  | NA                         | NA    | 2 | NA                                                    | Isovalerylcarni<br>tine (2.79 ×<br>10 <sup>-8</sup> ),<br>Propionylcarni<br>tine (8.32 ×<br>10 <sup>-10</sup> ) | NA                                                    |



|             |                |   |              |                             |        |              |                             |        |   |    |                                                                                                                 |    |
|-------------|----------------|---|--------------|-----------------------------|--------|--------------|-----------------------------|--------|---|----|-----------------------------------------------------------------------------------------------------------------|----|
| ASGA0003288 | rs8135459<br>9 | 1 | 7560220<br>1 | MCHR2<br>(NM_0010446<br>09) | 19681  | 6687676<br>1 | MCHR2<br>(NM_0010446<br>09) | 19814  | 2 | NA | Isovalerylcarni<br>tine (2.79 ×<br>10 <sup>-8</sup> ),<br>Propionylcarni<br>tine (8.32 ×<br>10 <sup>-10</sup> ) | NA |
| ASGA0003312 | rs8079301<br>1 | 1 | 7618983<br>1 | SIM1<br>(NM_0011725<br>85)  | 118601 | 6742942<br>9 | SIM1<br>(NM_0011725<br>85)  | 136293 | 2 | NA | Isovalerylcarni<br>tine (2.79 ×<br>10 <sup>-8</sup> ),<br>Propionylcarni<br>tine (8.32 ×<br>10 <sup>-10</sup> ) | NA |
| ASGA0003314 | rs8082950<br>8 | 1 | 7621547<br>2 | SIM1<br>(NM_0011725<br>85)  | 144242 | 6745561<br>3 | SIM1<br>(NM_0011725<br>85)  | 162477 | 2 | NA | Isovalerylcarni<br>tine (2.79 ×<br>10 <sup>-8</sup> ),<br>Propionylcarni<br>tine (8.32 ×<br>10 <sup>-10</sup> ) | NA |
| ASGA0003315 | rs8135464<br>5 | 1 | 7643814<br>0 | SIM1<br>(NM_0011725<br>85)  | 366910 | 6752314<br>0 | SIM1<br>(NM_0011725<br>85)  | 230004 | 2 | NA | Isovalerylcarni<br>tine (2.79 ×<br>10 <sup>-8</sup> ),<br>Propionylcarni<br>tine (8.32 ×<br>10 <sup>-10</sup> ) | NA |
| ASGA0003317 | rs8135465<br>3 | 1 | 7641635<br>7 | SIM1<br>(NM_0011725<br>85)  | 345127 | 6760639<br>0 | SIM1<br>(NM_0011725<br>85)  | 313254 | 2 | NA | Isovalerylcarni<br>tine (2.79 ×<br>10 <sup>-8</sup> ),<br>Propionylcarni<br>tine (8.32 ×<br>10 <sup>-10</sup> ) | NA |
| ASGA0003333 | rs8135471<br>9 | 1 | 7834769<br>8 | NA                          | NA     | 6937767<br>7 | NA                          | NA     | 2 | NA | Isovalerylcarni<br>tine (2.79 ×<br>10 <sup>-8</sup> ),<br>Propionylcarni<br>tine (8.32 ×<br>10 <sup>-10</sup> ) | NA |
| ASGA0003335 | rs8096580<br>1 | 1 | 7858764<br>6 | NA                          | NA     | 6958294<br>0 | NA                          | NA     | 2 | NA | Isovalerylcarni<br>tine (2.79 ×<br>10 <sup>-8</sup> ),<br>Propionylcarni<br>tine (8.32 ×<br>10 <sup>-10</sup> ) | NA |

|             |                |    |               |                                 |        |               |                                 |        |   |    |                                                                                                         |                                            |
|-------------|----------------|----|---------------|---------------------------------|--------|---------------|---------------------------------|--------|---|----|---------------------------------------------------------------------------------------------------------|--------------------------------------------|
| ASGA0023013 | rs8091468<br>2 | 4  | 1356779<br>51 | TMED5<br>(NM_0012436<br>95)     | 96353  | 1239664<br>45 | TMED5<br>(NM_0012436<br>95)     | 43379  | 2 | NA | Glutamic acid<br>( $3.57 \times 10^{-10}$ )                                                             | Glutamic acid<br>( $4.80 \times 10^{-8}$ ) |
| ASGA0025965 | rs8091523<br>3 | 5  | 6814946<br>4  | C5H12orf4<br>(NM_0012434<br>12) | 4228   | 6594357<br>0  | C5H12orf4<br>(NM_0012434<br>12) | 4230   | 2 | NA | Glutamic acid<br>( $3.57 \times 10^{-10}$ )                                                             | Glutamic acid<br>( $4.80 \times 10^{-8}$ ) |
| ASGA0044546 | rs8141666<br>6 | 9  | 1339597<br>74 | TOR1AIP2<br>(NM_0012433<br>89)  | 487430 | 1222210<br>03 | STX6<br>(NM_0012437<br>20)      | 312735 | 2 | NA | Carnitine ( $1.24 \times 10^{-8}$ )                                                                     | Carnitine ( $5.24 \times 10^{-8}$ )        |
| ASGA0057312 | rs8144501<br>5 | 13 | 4023890<br>0  | NA                              | NA     | 3687336<br>1  | NA                              | NA     | 2 | NA | Isovalerylcarni<br>tine ( $2.79 \times 10^{-8}$ ),<br>Propionylcarni<br>tine ( $8.32 \times 10^{-10}$ ) | NA                                         |
| ASGA0083304 | rs8133677<br>9 | 1  | 7701148<br>5  | NA                              | NA     | 6818658<br>7  | NA                              | NA     | 2 | NA | Isovalerylcarni<br>tine ( $2.79 \times 10^{-8}$ ),<br>Propionylcarni<br>tine ( $8.32 \times 10^{-10}$ ) | NA                                         |
| DRGA0000994 | NA             | 1  | 6645539<br>4  | NA                              | NA     | NA            | NA                              | NA     | 2 | NA | Isovalerylcarni<br>tine ( $2.79 \times 10^{-8}$ ),<br>Propionylcarni<br>tine ( $8.32 \times 10^{-10}$ ) | NA                                         |
| DRGA0001072 | NA             | 1  | 7078456<br>4  | NA                              | NA     | NA            | NA                              | NA     | 2 | NA | Isovalerylcarni<br>tine ( $2.79 \times 10^{-8}$ ),<br>Propionylcarni<br>tine ( $8.32 \times 10^{-10}$ ) | NA                                         |
| DRGA0001073 | NA             | 1  | 7089874<br>7  | NA                              | NA     | NA            | NA                              | NA     | 2 | NA | Isovalerylcarni<br>tine ( $2.79 \times 10^{-8}$ ),<br>Propionylcarni<br>tine ( $8.32 \times 10^{-10}$ ) | NA                                         |
| H3GA0001865 | rs8079832<br>5 | 1  | 6780946<br>3  | NA                              | NA     | 6054961<br>9  | NA                              | NA     | 2 | NA | Isovalerylcarni<br>tine ( $2.79 \times 10^{-8}$ ),<br>Propionylcarni                                    | NA                                         |

|             |                 |    |               |                                      |        |               |                                      |        |   |    |                                                                                                                                                        |                                             |
|-------------|-----------------|----|---------------|--------------------------------------|--------|---------------|--------------------------------------|--------|---|----|--------------------------------------------------------------------------------------------------------------------------------------------------------|---------------------------------------------|
| H3GA0001937 | rs8135463<br>9  | 1  | 7562651<br>1  | <i>MCHR2</i><br>(NM_0010446<br>09)   | 43991  | 6707285<br>7  | <i>SIM1</i><br>(NM_0011725<br>85)    | 146052 | 2 | NA | tine (8.32 ×<br>10 <sup>-10</sup> )<br>Isovalerylcarni<br>tine (2.79 ×<br>10 <sup>-8</sup> ),<br>Propionylcarni<br>tine (8.32 ×<br>10 <sup>-10</sup> ) | NA                                          |
| H3GA0001949 | rs8135465<br>6  | 1  | 7629735<br>3  | <i>SIM1</i><br>(NM_0011725<br>85)    | 226123 | 6771894<br>4  | <i>SIM1</i><br>(NM_0011725<br>85)    | 425808 | 2 | NA | Isovalerylcarni<br>tine (2.79 ×<br>10 <sup>-8</sup> ),<br>Propionylcarni<br>tine (8.32 ×<br>10 <sup>-10</sup> )                                        | NA                                          |
| H3GA0001956 | rs8091821<br>8  | 1  | 7740247<br>6  | NA                                   | NA     | 6852544<br>0  | NA                                   | NA     | 2 | NA | Isovalerylcarni<br>tine (2.79 ×<br>10 <sup>-8</sup> ),<br>Propionylcarni<br>tine (8.32 ×<br>10 <sup>-10</sup> )                                        | NA                                          |
| H3GA0001966 | rs8135472<br>3  | 1  | 7842384<br>8  | NA                                   | NA     | 6945383<br>5  | NA                                   | NA     | 2 | NA | Isovalerylcarni<br>tine (2.79 ×<br>10 <sup>-8</sup> ),<br>Propionylcarni<br>tine (8.32 ×<br>10 <sup>-10</sup> )                                        | NA                                          |
| H3GA0014734 | rs8085291<br>4  | 4  | 1352340<br>38 | <i>DNTTIP2</i><br>(NM_0012436<br>74) | 180160 | 1235954<br>35 | <i>DNTTIP2</i><br>(NM_0012436<br>74) | 186975 | 2 | NA | Glutamic acid<br>(3.57 × 10 <sup>-10</sup> )                                                                                                           | Glutamic acid<br>(4.80 × 10 <sup>-8</sup> ) |
| H3GA0046845 | rs8146078<br>1  | 16 | 6503388<br>7  | <i>MAT2B</i><br>(NM_0011428<br>32)   | 62817  | 6019602<br>2  | <i>MAT2B</i><br>(NM_0011428<br>32)   | 59524  | 2 | NA | Isovalerylcarni<br>tine (2.79 ×<br>10 <sup>-8</sup> ),<br>Propionylcarni<br>tine (8.32 ×<br>10 <sup>-10</sup> )                                        | NA                                          |
| INRA0002726 | rs3419344<br>11 | 1  | 7409674<br>6  | <i>FBXL4</i><br>(NM_0011717<br>52)   | 325687 | 6553799<br>2  | <i>FBXL4</i><br>(NM_0011717<br>52)   | 334180 | 2 | NA | Isovalerylcarni<br>tine (2.79 ×<br>10 <sup>-8</sup> ),<br>Propionylcarni<br>tine (8.32 ×<br>10 <sup>-10</sup> )                                        | NA                                          |
| INRA0002819 | rs3380237<br>09 | 1  | 7742482<br>6  | NA                                   | NA     | 6854924<br>9  | NA                                   | NA     | 2 | NA | Isovalerylcarni<br>tine (2.79 ×                                                                                                                        | NA                                          |

|             |                 |   |              |                                    |        |              |                                    |        |   |    |                                                                                                                                                                                                |    |
|-------------|-----------------|---|--------------|------------------------------------|--------|--------------|------------------------------------|--------|---|----|------------------------------------------------------------------------------------------------------------------------------------------------------------------------------------------------|----|
| INRA0002820 | rs3312789<br>24 | 1 | 7745773<br>7 | NA                                 | NA     | 6858170<br>0 | NA                                 | NA     | 2 | NA | 10 <sup>-8</sup> ),<br>Propionylcarni<br>tine (8.32 ×<br>10 <sup>-10</sup> )<br>Isovalerylarni<br>tine (2.79 ×<br>10 <sup>-8</sup> ),<br>Propionylcarni<br>tine (8.32 ×<br>10 <sup>-10</sup> ) | NA |
| INRA0002823 | rs3193235<br>32 | 1 | 7761627<br>2 | NA                                 | NA     | 6874075<br>9 | NA                                 | NA     | 2 | NA | 10 <sup>-8</sup> ),<br>Propionylcarni<br>tine (8.32 ×<br>10 <sup>-10</sup> )<br>Isovalerylarni<br>tine (2.79 ×<br>10 <sup>-8</sup> ),<br>Propionylcarni<br>tine (8.32 ×<br>10 <sup>-10</sup> ) | NA |
| MARC0021047 | rs8087218<br>3  | 1 | 7806151<br>7 | NA                                 | NA     | 6899526<br>6 | NA                                 | NA     | 2 | NA | 10 <sup>-8</sup> ),<br>Propionylcarni<br>tine (8.32 ×<br>10 <sup>-10</sup> )<br>Isovalerylarni<br>tine (2.79 ×<br>10 <sup>-8</sup> ),<br>Propionylcarni<br>tine (8.32 ×<br>10 <sup>-10</sup> ) | NA |
| MARC0027518 | rs8122296<br>8  | 1 | 6448864<br>9 | <i>RRAGD</i><br>(NM_0012436<br>23) | 289310 | 5758660<br>7 | <i>RRAGD</i><br>(NM_0012436<br>23) | 162549 | 2 | NA | 10 <sup>-8</sup> ),<br>Propionylcarni<br>tine (8.32 ×<br>10 <sup>-10</sup> )<br>Isovalerylarni<br>tine (2.79 ×<br>10 <sup>-8</sup> ),<br>Propionylcarni<br>tine (8.32 ×<br>10 <sup>-10</sup> ) | NA |
| MARC0034307 | rs8122835<br>1  | 1 | 7692925<br>5 | NA                                 | NA     | 6810355<br>2 | NA                                 | NA     | 2 | NA | 10 <sup>-8</sup> ),<br>Propionylcarni<br>tine (8.32 ×<br>10 <sup>-10</sup> )<br>Isovalerylarni<br>tine (2.79 ×<br>10 <sup>-8</sup> ),<br>Propionylcarni<br>tine (8.32 ×<br>10 <sup>-10</sup> ) | NA |
| MARC0050325 | rs8088485<br>9  | 1 | 7625402<br>1 | <i>SIM1</i><br>(NM_0011725<br>85)  | 182791 | 6749680<br>5 | <i>SIM1</i><br>(NM_0011725<br>85)  | 203669 | 2 | NA | 10 <sup>-8</sup> ),<br>Propionylcarni<br>tine (8.32 ×<br>10 <sup>-10</sup> )<br>Isovalerylarni<br>tine (2.79 ×<br>10 <sup>-8</sup> ),<br>Propionylcarni<br>tine (8.32 ×<br>10 <sup>-10</sup> ) | NA |
| MARC0059407 | rs8097646<br>5  | 1 | 7230005<br>6 | <i>FHL5</i><br>(NM_0012433<br>14)  | 179132 | 6393051<br>6 | <i>FHL5</i><br>(NM_0012433<br>14)  | 178366 | 2 | NA | 10 <sup>-8</sup> ),<br>Propionylcarni<br>tine (8.32 ×<br>10 <sup>-10</sup> )<br>Isovalerylarni<br>tine (2.79 ×<br>10 <sup>-8</sup> ),<br>Propionylcarni<br>tine (8.32 ×<br>10 <sup>-10</sup> ) | NA |

|                         |                 |    |               |                                     |        |               |                                     |        |   |                                                                          |                                                                                                                                                                          |                                                      |
|-------------------------|-----------------|----|---------------|-------------------------------------|--------|---------------|-------------------------------------|--------|---|--------------------------------------------------------------------------|--------------------------------------------------------------------------------------------------------------------------------------------------------------------------|------------------------------------------------------|
| MARC0063106             | rs8125188<br>5  | 1  | 6739287<br>4  | NA                                  | NA     | 6019073<br>2  | NA                                  | NA     | 2 | NA                                                                       | Propionylcarni<br>tine (8.32 ×<br>10 <sup>-10</sup> )<br>Isovalerylcarni<br>tine (2.79 ×<br>10 <sup>-8</sup> ),<br>Propionylcarni<br>tine (8.32 ×<br>10 <sup>-10</sup> ) | NA                                                   |
| MARC0068954             | rs8086039<br>7  | 1  | 6907927<br>2  | NA                                  | NA     | 6128641<br>1  | NA                                  | NA     | 2 | NA                                                                       | Isovalerylcarni<br>tine (2.79 ×<br>10 <sup>-8</sup> ),<br>Propionylcarni<br>tine (8.32 ×<br>10 <sup>-10</sup> )                                                          | NA                                                   |
| MARC0075306             | rs8083869<br>3  | 1  | 7426458<br>4  | <i>FBXL4</i><br>(NM_0011717<br>52)  | 157849 | 6571172<br>8  | <i>FBXL4</i><br>(NM_0011717<br>52)  | 160444 | 2 | NA                                                                       | Isovalerylcarni<br>tine (2.79 ×<br>10 <sup>-8</sup> ),<br>Propionylcarni<br>tine (8.32 ×<br>10 <sup>-10</sup> )                                                          | NA                                                   |
| MARC0075913             | rs8126084<br>9  | 10 | 6389965       | NA                                  | NA     | 4673147       | NA                                  | NA     | 2 | NA                                                                       | Carnitine (1.24<br>× 10 <sup>-8</sup> )                                                                                                                                  | Carnitine (5.24<br>× 10 <sup>-8</sup> )              |
| MARC0080116             | rs8080172<br>4  | 4  | 3550229       | NA                                  | NA     | 3937200       | NA                                  | NA     | 2 | Pyruvic acid<br>(4.06 × 10 <sup>-8</sup> )                               | NA                                                                                                                                                                       | Citrulline (8.58<br>× 10 <sup>-7</sup> )             |
| MARC0085569             | rs8094874<br>1  | 5  | 6841776<br>0  | <i>CCND2</i><br>(NM_214088)         | 85816  | 6614517<br>5  | <i>CCND2</i><br>(NM_214088)         | 30600  | 2 | NA                                                                       | Glutamic acid<br>(3.57 × 10 <sup>-10</sup> )                                                                                                                             | Glutamic acid<br>(4.80 × 10 <sup>-8</sup> )          |
| SIRI0000655             | rs3183933<br>13 | 1  | 7866609<br>3  | NA                                  | NA     | 6966138<br>9  | NA                                  | NA     | 2 | NA                                                                       | Isovalerylcarni<br>tine (2.79 ×<br>10 <sup>-8</sup> ),<br>Propionylcarni<br>tine (8.32 ×<br>10 <sup>-10</sup> )                                                          | NA                                                   |
| WU_10.2_18_15516<br>325 | rs3396316<br>16 | 18 | 1551632<br>5  | <i>AKR1B1</i><br>(NM_0010015<br>39) | 80480  | 1465375<br>6  | <i>AKR1B1</i><br>(NM_0010015<br>39) | 80335  | 2 | NA                                                                       | Carnitine (1.24<br>× 10 <sup>-8</sup> )                                                                                                                                  | Carnitine (5.24<br>× 10 <sup>-8</sup> )              |
| WU_10.2_9_136780<br>050 | rs3226304<br>79 | 9  | 1367800<br>50 | <i>LAMC1</i><br>(NM_0012717<br>15)  | 111754 | 1244684<br>20 | <i>LAMC1</i><br>(NM_0012717<br>15)  | 62453  | 2 | NA                                                                       | Carnitine (1.24<br>× 10 <sup>-8</sup> )                                                                                                                                  | Carnitine (5.24<br>× 10 <sup>-8</sup> )              |
| ALGA0038416             | rs8096412<br>6  | 7  | 8540896       | NA                                  | NA     | 8068810       | <i>MIR7136</i><br>(NR_128452)       | 66398  | 3 | Isovalerylcarni<br>tine (3.47 ×<br>10 <sup>-8</sup> ),<br>Propionylcarni | NA                                                                                                                                                                       | Propionylcarni<br>tine (4.66 ×<br>10 <sup>-7</sup> ) |

|                          |                 |    |               |                                      |                           |               |                                     |                           |   |                                                                                                                                                                                                                   |    |                                                                                   |
|--------------------------|-----------------|----|---------------|--------------------------------------|---------------------------|---------------|-------------------------------------|---------------------------|---|-------------------------------------------------------------------------------------------------------------------------------------------------------------------------------------------------------------------|----|-----------------------------------------------------------------------------------|
| ALGA0081238              | rs8095404<br>4  | 14 | 1244162<br>61 | <i>STN1</i><br>(NM_0012436<br>85)    | 310170                    | 1145347<br>75 | <i>MIR1307</i><br>(NR_035394)       | 209072                    | 3 | tine (1.17 × 10 <sup>-9</sup> )<br>Isovalerylcarni<br>tine (1.27 × 10 <sup>-8</sup> ),<br>Propionylcarni<br>tine (3.01 × 10 <sup>-10</sup> )                                                                      | NA | Propionylcarni<br>tine (3.27 × 10 <sup>-8</sup> )                                 |
| ASGA0093565              | rs8131250<br>7  | 6  | 1354241<br>76 | <i>DNAJC6</i><br>(NM_0011453<br>78)  | 8 <sup>th</sup><br>intron | 1470189<br>65 | <i>DNAJC6</i><br>(NM_0011453<br>78) | 8 <sup>th</sup><br>intron | 3 | 1-hexadecyl-<br>sn-glycero-3-<br>phosphocholin<br>e (2.78 × 10 <sup>-9</sup> ),<br>1-myristoyl-sn-<br>glycero-3-<br>phosphocholin<br>e (1.35 × 10 <sup>-8</sup> ),<br>LysoPC(16:0)<br>(1.22 × 10 <sup>-7</sup> )  | NA | NA                                                                                |
| DRGA0014486              | NA              | 14 | 1213916<br>05 | <i>KAZALD1</i><br>(NM_0012445<br>51) | 312903                    | NA            | NA                                  | NA                        | 3 | Isovalerylcarni<br>tine (1.27 × 10 <sup>-8</sup> ),<br>Propionylcarni<br>tine (3.01 × 10 <sup>-10</sup> )                                                                                                         | NA | Propionylcarni<br>tine (3.27 × 10 <sup>-8</sup> )                                 |
| H3GA0053559              | rs8134417<br>9  | 17 | 4693202<br>0  | <i>LBP</i><br>(NM_0011284<br>35)     | 63443                     | 4149290<br>5  | <i>LBP</i><br>(NM_0011284<br>35)    | 63438                     | 3 | 1-hexadecyl-<br>sn-glycero-3-<br>phosphocholin<br>e (3.05 × 10 <sup>-10</sup> ),<br>1-myristoyl-sn-<br>glycero-3-<br>phosphocholin<br>e (2.76 × 10 <sup>-8</sup> ),<br>LysoPC(16:0)<br>(4.69 × 10 <sup>-9</sup> ) | NA | NA                                                                                |
| M1GA0016778              | rs8143538<br>3  | 12 | 4419222<br>5  | <i>CDK5R1</i><br>(NM_0011018<br>16)  | 60431                     | 4243298<br>9  | <i>CDK5R1</i><br>(NM_0011018<br>16) | 60402                     | 3 | Pyruvic acid<br>(1.30 × 10 <sup>-9</sup> )                                                                                                                                                                        | NA | Citrulline (3.94 × 10 <sup>-7</sup> ), Pyruvic<br>acid (1.57 × 10 <sup>-8</sup> ) |
| WU_10.2_14_13224<br>6191 | rs3392206<br>18 | 14 | 1322461<br>91 | <i>ADRA2A</i><br>(NM_214400)         | 157702                    | 1213193<br>14 | <i>ADRA2A</i><br>(NM_214400)        | 150257                    | 3 | Isovalerylcarni<br>tine (1.27 × 10 <sup>-8</sup> ),<br>Propionylcarni                                                                                                                                             | NA | Propionylcarni<br>tine (3.27 × 10 <sup>-8</sup> )                                 |

|                         |                 |   |               |                                   |        |               |                                   |        |   |                                                                                                                                                                                                                                                  |    |    |
|-------------------------|-----------------|---|---------------|-----------------------------------|--------|---------------|-----------------------------------|--------|---|--------------------------------------------------------------------------------------------------------------------------------------------------------------------------------------------------------------------------------------------------|----|----|
| WU_10.2_6_136216<br>429 | rs3432401<br>55 | 6 | 1362164<br>29 | <i>JAK1</i><br>(NM_214114)        | 298537 | 1478906<br>82 | <i>JAK1</i><br>(NM_214114)        | 323495 | 3 | tine ( $3.01 \times 10^{-10}$ )<br>1-hexadecyl-<br>sn-glycero-3-<br>phosphocholin<br>e ( $2.78 \times 10^{-9}$ ),<br>1-myristoyl-sn-<br>glycero-3-<br>phosphocholin<br>e ( $1.35 \times 10^{-8}$ ),<br>LysoPC(16:0)<br>( $1.22 \times 10^{-7}$ ) | NA | NA |
| WU_10.2_6_136863<br>547 | rs3387714<br>82 | 6 | 1368635<br>47 | <i>PGM1</i><br>(NM_0012463<br>18) | 307725 | 1484109<br>37 | <i>PGM1</i><br>(NM_0012463<br>18) | 440248 | 3 | 1-hexadecyl-<br>sn-glycero-3-<br>phosphocholin<br>e ( $2.78 \times 10^{-9}$ ),<br>1-myristoyl-sn-<br>glycero-3-<br>phosphocholin<br>e ( $1.35 \times 10^{-8}$ ),<br>LysoPC(16:0)<br>( $1.22 \times 10^{-7}$ )                                    | NA | NA |
| WU_10.2_6_136876<br>717 | rs3231245<br>81 | 6 | 1368767<br>17 | <i>PGM1</i><br>(NM_0012463<br>18) | 294555 | 1484241<br>03 | <i>PGM1</i><br>(NM_0012463<br>18) | 294555 | 3 | 1-hexadecyl-<br>sn-glycero-3-<br>phosphocholin<br>e ( $2.78 \times 10^{-9}$ ),<br>1-myristoyl-sn-<br>glycero-3-<br>phosphocholin<br>e ( $1.35 \times 10^{-8}$ ),<br>LysoPC(16:0)<br>( $1.22 \times 10^{-7}$ )                                    | NA | NA |
| WU_10.2_6_136972<br>846 | rs3221692<br>60 | 6 | 1369728<br>46 | <i>PGM1</i><br>(NM_0012463<br>18) | 198426 | 1486527<br>84 | <i>PGM1</i><br>(NM_0012463<br>18) | 198401 | 3 | 1-hexadecyl-<br>sn-glycero-3-<br>phosphocholin<br>e ( $2.78 \times 10^{-9}$ ),<br>1-myristoyl-sn-<br>glycero-3-<br>phosphocholin<br>e ( $1.35 \times 10^{-8}$ ),<br>LysoPC(16:0)<br>( $1.22 \times 10^{-7}$ )                                    | NA | NA |

|             |                 |   |               |                             |        |               |                             |        |   |                                                                                                                                                                                                                                                              |    |                                                                                      |
|-------------|-----------------|---|---------------|-----------------------------|--------|---------------|-----------------------------|--------|---|--------------------------------------------------------------------------------------------------------------------------------------------------------------------------------------------------------------------------------------------------------------|----|--------------------------------------------------------------------------------------|
| ALGA0099866 | rs8090093<br>4  | X | 1051478<br>53 | ACSL4<br>(NM_0010386<br>94) | 228041 | 8953393<br>1  | ACSL4<br>(NM_0010386<br>94) | 226931 | 4 | 1-hexadecyl-<br>sn-glycero-3-<br>phosphocholin<br>e ( $3.35 \times 10^{-10}$ ),<br>1-myristoyl-sn-<br>glycero-3-<br>phosphocholin<br>e ( $2.77 \times 10^{-9}$ ),<br>LysoPC(16:0)<br>( $1.16 \times 10^{-7}$ ),<br>Pyruvic acid<br>( $8.03 \times 10^{-9}$ ) | NA | NA                                                                                   |
| ASGA0018324 | rs8089392<br>0  | 4 | 1217411<br>9  | NA                          | NA     | 1190883<br>2  | NA                          | NA     | 4 | Citrulline ( $2.75 \times 10^{-9}$ ), Pyruvic<br>acid ( $1.24 \times 10^{-16}$ )                                                                                                                                                                             | NA | Citrulline ( $4.22 \times 10^{-11}$ ),<br>Pyruvic acid<br>( $1.64 \times 10^{-13}$ ) |
| ASGA0081223 | rs8147342<br>1  | X | 1036576<br>59 | NA                          | NA     | 8913109<br>9  | NA                          | NA     | 4 | 1-hexadecyl-<br>sn-glycero-3-<br>phosphocholin<br>e ( $2.63 \times 10^{-15}$ ),<br>1-myristoyl-sn-<br>glycero-3-<br>phosphocholin<br>e ( $1.49 \times 10^{-13}$ ),<br>LysoPC(16:0)<br>( $7.03 \times 10^{-11}$ )                                             | NA | 1-hexadecyl-<br>sn-glycero-3-<br>phosphocholin<br>e ( $4.05 \times 10^{-9}$ )        |
| INRA0003881 | rs3353676<br>06 | 1 | 1263104<br>19 | AQP9<br>(NM_0011126<br>84)  | 357302 | 1141833<br>84 | AQP9<br>(NM_0011126<br>84)  | 334932 | 4 | 1-hexadecyl-<br>sn-glycero-3-<br>phosphocholin<br>e ( $2.63 \times 10^{-15}$ ),<br>1-myristoyl-sn-<br>glycero-3-<br>phosphocholin<br>e ( $1.49 \times 10^{-13}$ ),<br>LysoPC(16:0)<br>( $7.03 \times 10^{-11}$ )                                             | NA | 1-hexadecyl-<br>sn-glycero-3-<br>phosphocholin<br>e ( $4.05 \times 10^{-9}$ )        |
| MARC0046138 | rs8123831<br>4  | 1 | 2282875<br>95 | NA                          | NA     | 2046527<br>21 | NA                          | NA     | 4 | 1-hexadecyl-<br>sn-glycero-3-<br>phosphocholin<br>e ( $2.63 \times 10^{-15}$ ),<br>1-myristoyl-sn-<br>glycero-3-<br>phosphocholin                                                                                                                            | NA | 1-hexadecyl-<br>sn-glycero-3-<br>phosphocholin<br>e ( $4.05 \times 10^{-9}$ )        |



|                     |             |   |           |                      |        |          |                      |        |   |                                                                                                                                                                                                                                                          |    |                                                                   |
|---------------------|-------------|---|-----------|----------------------|--------|----------|----------------------|--------|---|----------------------------------------------------------------------------------------------------------------------------------------------------------------------------------------------------------------------------------------------------------|----|-------------------------------------------------------------------|
| WU_10.2_X_103597980 | rs337506275 | X | 103597980 | NA                   | NA     | 89142300 | NA                   | NA     | 4 | e ( $1.49 \times 10^{-13}$ ), LysoPC(16:0) ( $7.03 \times 10^{-11}$ )<br>1-hexadecyl-sn-glycero-3-phosphocholine ( $2.63 \times 10^{-15}$ ), 1-myristoyl-sn-glycero-3-phosphocholine ( $1.49 \times 10^{-13}$ ), LysoPC(16:0) ( $7.03 \times 10^{-11}$ ) | NA | 1-hexadecyl-sn-glycero-3-phosphocholine ( $4.05 \times 10^{-9}$ ) |
| WU_10.2_X_103653646 | rs331101550 | X | 103653646 | NA                   | NA     | 89135113 | NA                   | NA     | 4 | 1-hexadecyl-sn-glycero-3-phosphocholine ( $2.63 \times 10^{-15}$ ), 1-myristoyl-sn-glycero-3-phosphocholine ( $1.49 \times 10^{-13}$ ), LysoPC(16:0) ( $7.03 \times 10^{-11}$ )                                                                          | NA | 1-hexadecyl-sn-glycero-3-phosphocholine ( $4.05 \times 10^{-9}$ ) |
| WU_10.2_X_104796075 | rs336044303 | X | 104796075 | NA                   | NA     | 89243691 | NA                   | NA     | 4 | 1-hexadecyl-sn-glycero-3-phosphocholine ( $2.63 \times 10^{-15}$ ), 1-myristoyl-sn-glycero-3-phosphocholine ( $1.49 \times 10^{-13}$ ), LysoPC(16:0) ( $7.03 \times 10^{-11}$ )                                                                          | NA | 1-hexadecyl-sn-glycero-3-phosphocholine ( $4.05 \times 10^{-9}$ ) |
| WU_10.2_X_104910069 | rs324354886 | X | 104910069 | ACSL4 (NM_001038694) | 465825 | 89357685 | ACSL4 (NM_001038694) | 403177 | 4 | 1-hexadecyl-sn-glycero-3-phosphocholine ( $2.63 \times 10^{-15}$ ), 1-myristoyl-sn-glycero-3-phosphocholine ( $1.49 \times 10^{-13}$ ), LysoPC(16:0) ( $7.03 \times 10^{-11}$ )                                                                          | NA | 1-hexadecyl-sn-glycero-3-phosphocholine ( $4.05 \times 10^{-9}$ ) |

|                         |                 |   |               |                             |        |              |                             |        |   |                                                                                                                                                                                                                                                              |    |                                                                               |
|-------------------------|-----------------|---|---------------|-----------------------------|--------|--------------|-----------------------------|--------|---|--------------------------------------------------------------------------------------------------------------------------------------------------------------------------------------------------------------------------------------------------------------|----|-------------------------------------------------------------------------------|
| WU_10.2_X_10495<br>6283 | rs3210200<br>09 | X | 1049562<br>83 | ACSL4<br>(NM_0010386<br>94) | 419611 | 8940388<br>6 | ACSL4<br>(NM_0010386<br>94) | 356976 | 4 | 1-hexadecyl-<br>sn-glycero-3-<br>phosphocholin<br>e ( $2.63 \times 10^{-15}$ ),<br>1-myristoyl-sn-<br>glycero-3-<br>phosphocholin<br>e ( $1.49 \times 10^{-13}$ ),<br>LysoPC(16:0)<br>( $7.03 \times 10^{-11}$ )                                             | NA | 1-hexadecyl-<br>sn-glycero-3-<br>phosphocholin<br>e ( $4.05 \times 10^{-9}$ ) |
| WU_10.2_X_10498<br>0830 | rs3438220<br>51 | X | 1049808<br>30 | ACSL4<br>(NM_0010386<br>94) | 395064 | 8942843<br>1 | ACSL4<br>(NM_0010386<br>94) | 332431 | 4 | 1-hexadecyl-<br>sn-glycero-3-<br>phosphocholin<br>e ( $2.63 \times 10^{-15}$ ),<br>1-myristoyl-sn-<br>glycero-3-<br>phosphocholin<br>e ( $1.49 \times 10^{-13}$ ),<br>LysoPC(16:0)<br>( $7.03 \times 10^{-11}$ )                                             | NA | 1-hexadecyl-<br>sn-glycero-3-<br>phosphocholin<br>e ( $4.05 \times 10^{-9}$ ) |
| WU_10.2_X_10555<br>9450 | rs3396422<br>75 | X | 1055594<br>50 | ACSL4<br>(NM_0010386<br>94) | 106806 | 8989240<br>8 | ACSL4<br>(NM_0010386<br>94) | 54800  | 4 | 1-hexadecyl-<br>sn-glycero-3-<br>phosphocholin<br>e ( $3.35 \times 10^{-10}$ ),<br>1-myristoyl-sn-<br>glycero-3-<br>phosphocholin<br>e ( $2.77 \times 10^{-9}$ ),<br>LysoPC(16:0)<br>( $1.16 \times 10^{-7}$ ),<br>Pyruvic acid<br>( $8.03 \times 10^{-9}$ ) | NA | NA                                                                            |
| WU_10.2_X_10558<br>3738 | rs3261752<br>01 | X | 1055837<br>38 | ACSL4<br>(NM_0010386<br>94) | 131094 | 8991669<br>5 | ACSL4<br>(NM_0010386<br>94) | 79087  | 4 | 1-hexadecyl-<br>sn-glycero-3-<br>phosphocholin<br>e ( $2.63 \times 10^{-15}$ ),<br>1-myristoyl-sn-<br>glycero-3-<br>phosphocholin<br>e ( $1.49 \times 10^{-13}$ ),<br>LysoPC(16:0)<br>( $7.03 \times 10^{-11}$ )                                             | NA | 1-hexadecyl-<br>sn-glycero-3-<br>phosphocholin<br>e ( $4.05 \times 10^{-9}$ ) |

|                         |                 |   |               |                               |        |              |                               |        |   |                                                                                          |    |                                                                                           |
|-------------------------|-----------------|---|---------------|-------------------------------|--------|--------------|-------------------------------|--------|---|------------------------------------------------------------------------------------------|----|-------------------------------------------------------------------------------------------|
| WU_10.2_X_11464<br>9203 | rs3310773<br>55 | X | 1146492<br>03 | <i>IL13RA1</i><br>(NM_214341) | 262774 | 9686352<br>1 | <i>IL13RA1</i><br>(NM_214341) | 437438 | 4 | Citrulline (2.75<br>× 10 <sup>-9</sup> ), Pyruvic<br>acid (1.24 ×<br>10 <sup>-16</sup> ) | NA | Citrulline (4.22<br>× 10 <sup>-11</sup> ),<br>Pyruvic acid<br>(1.64 × 10 <sup>-13</sup> ) |
|-------------------------|-----------------|---|---------------|-------------------------------|--------|--------------|-------------------------------|--------|---|------------------------------------------------------------------------------------------|----|-------------------------------------------------------------------------------------------|

Note: NA indicates not applicable. # indicates the SNP position and annotation of latest porcine RefSeq database (Sscrofa11.1/susScr11).

**Supplementary Table S2.** All the metabolites in association with significant SNPs from first, second, and combined two sampling times.

| Metabolite                              | First Sampling Time    |                                                                                                                                                                                                                                                                                                                                                                                                                           | Second Sampling Time   |                          | Combined Two Sampling Times |                                                                                                                                                                                          | Common Significant SNP |
|-----------------------------------------|------------------------|---------------------------------------------------------------------------------------------------------------------------------------------------------------------------------------------------------------------------------------------------------------------------------------------------------------------------------------------------------------------------------------------------------------------------|------------------------|--------------------------|-----------------------------|------------------------------------------------------------------------------------------------------------------------------------------------------------------------------------------|------------------------|
|                                         | Significant SNP Number | Significant SNP Name                                                                                                                                                                                                                                                                                                                                                                                                      | Significant SNP Number | Significant SNP Name     | Significant SNP Number      | Significant SNP Name                                                                                                                                                                     |                        |
| 1-hexadecyl-sn-glycero-3-phosphocholine | 23                     | INRA0003881, MARC0046138, WU_10.2_6_135312468, ASGA0093565, WU_10.2_6_136216429, WU_10.2_6_136863547, WU_10.2_6_136876717, WU_10.2_6_136972846, MARC0060063, WU_10.2_8_142992366, DRGA0008955, ASGA0040302, H3GA0053559, WU_10.2_X_103597980, WU_10.2_X_103653646, ASGA0081223, WU_10.2_X_104796075, WU_10.2_X_104910069, WU_10.2_X_104956283, WU_10.2_X_104980830, ALGA0099866, WU_10.2_X_105559450, WU_10.2_X_105583738 | 1                      | WU_10.2_X_37114281       | 10                          | INRA0003881, MARC0046138, WU_10.2_X_103597980, WU_10.2_X_103653646, ASGA0081223, WU_10.2_X_104796075, WU_10.2_X_104910069, WU_10.2_X_104956283, WU_10.2_X_104980830, WU_10.2_X_105583738 | 0                      |
| 1-myristoyl-sn-glycero-3-phosphocholine | 18                     | INRA0003881, MARC0046138, ASGA0093565, WU_10.2_6_136216429, WU_10.2_6_136863547, WU_10.2_6_136876717, WU_10.2_6_136972846, H3GA0053559, WU_10.2_X_103597980, WU_10.2_X_103653646, ASGA0081223, WU_10.2_X_104796075, WU_10.2_X_104910069, WU_10.2_X_104956283, WU_10.2_X_104980830, ALGA0099866,                                                                                                                           | 2                      | H3GA0015652, MARC0010841 | 0                           | 0                                                                                                                                                                                        | 0                      |

|                     |    |                                                                                                                                                                                        |    |                                                                                                                                                                                                                                                                                                |   |                                                                                     |   |
|---------------------|----|----------------------------------------------------------------------------------------------------------------------------------------------------------------------------------------|----|------------------------------------------------------------------------------------------------------------------------------------------------------------------------------------------------------------------------------------------------------------------------------------------------|---|-------------------------------------------------------------------------------------|---|
| Aspartic acid       | 0  | WU_10.2_X_105559450,<br>WU_10.2_X_105583738<br>0                                                                                                                                       | 4  | 3_118102178, H3GA0055935,<br>ALGA0061605, 18_2566820                                                                                                                                                                                                                                           | 0 | 0                                                                                   | 0 |
| Carnitine           | 0  | 0                                                                                                                                                                                      | 5  | ASGA0044546,<br>WU_10.2_9_136780050,<br>MARC0075913, MARC0083382,<br>WU_10.2_18_15516325                                                                                                                                                                                                       | 4 | ASGA0044546,<br>WU_10.2_9_136780050,<br>MARC0075913,<br>WU_10.2_18_15516325         | 0 |
| Citrulline          | 2  | ASGA0018324,<br>WU_10.2_X_114649203                                                                                                                                                    | 0  | 0                                                                                                                                                                                                                                                                                              | 5 | MARC0080116,<br>ASGA0018324,<br>MARC0040505,<br>M1GA0016778,<br>WU_10.2_X_114649203 | 0 |
| Cotinine            | 2  | M1GA0015335, ALGA0072779                                                                                                                                                               | 0  | 0                                                                                                                                                                                                                                                                                              | 0 | 0                                                                                   | 0 |
| Creatinine          | 1  | ASGA0083287                                                                                                                                                                            | 0  | 0                                                                                                                                                                                                                                                                                              | 0 | 0                                                                                   | 0 |
| Glutamic acid       | 0  | 0                                                                                                                                                                                      | 5  | ALGA0028664, H3GA0014734,<br>ASGA0023013, ASGA0025965,<br>MARC0085569                                                                                                                                                                                                                          | 5 | ALGA0028664,<br>H3GA0014734,<br>ASGA0023013,<br>ASGA0025965,<br>MARC0085569         | 0 |
| Guanine             | 0  | 0                                                                                                                                                                                      | 5  | WU_10.2_12_49599992,<br>ASGA0054868,<br>WU_10.2_12_49979240,<br>ALGA0083708, ALGA0104701                                                                                                                                                                                                       | 0 | 0                                                                                   | 0 |
| Isoleucyl proline   | 0  | 0                                                                                                                                                                                      | 11 | ALGA0000375, ALGA0043837,<br>WU_10.2_7_100175430,<br>ALGA0046501, WU_10.2_8_12998407,<br>ALGA0046512,<br>WU_10.2_9_128572226,<br>H3GA0028115,<br>WU_10.2_13_204594763,<br>WU_10.2_13_204608919,<br>WU_10.2_13_204631833                                                                        | 0 | 0                                                                                   | 0 |
| Isovalerylcarnitine | 10 | H3GA0007606, M1GA0003090,<br>WU_10.2_2_132463311,<br>WU_10.2_2_132503341,<br>WU_10.2_2_132570224,<br>ALGA0038416, DRGA0014486,<br>ALGA0081238,<br>WU_10.2_14_132246191,<br>ALGA0103368 | 57 | MARC0027518, DRGA0000994,<br>MARC0063106, H3GA0001865,<br>MARC0068954, ASGA0003182,<br>ALGA0003891, ALGA0003900,<br>DRGA0001072, DRGA0001073,<br>ASGA0003194, MARC0059407,<br>ALGA0003935, ALGA0003952,<br>ALGA0003953, ASGA0003235,<br>INRA0002726, MARC0075306,<br>ALGA0003995, ALGA0004000, | 1 | ALGA0103368                                                                         | 0 |

---

---

|                |    |                                                                                                                                                                                                                                                                                                                                                                                                                                               |   |                                                                                                                                                                                                                                                                                                                                                                                                                                                                                                                                                       |   |             |   |   |
|----------------|----|-----------------------------------------------------------------------------------------------------------------------------------------------------------------------------------------------------------------------------------------------------------------------------------------------------------------------------------------------------------------------------------------------------------------------------------------------|---|-------------------------------------------------------------------------------------------------------------------------------------------------------------------------------------------------------------------------------------------------------------------------------------------------------------------------------------------------------------------------------------------------------------------------------------------------------------------------------------------------------------------------------------------------------|---|-------------|---|---|
|                |    |                                                                                                                                                                                                                                                                                                                                                                                                                                               |   | ALGA0004002, ALGA0004005,<br>ALGA0004006, ALGA0004024,<br>ALGA0004041, ALGA0004042,<br>ALGA0004046, ALGA0004048,<br>ASGA0003288, H3GA0001937,<br>ALGA0004073, ALGA0004090,<br>ASGA0003312, ASGA0003314,<br>MARC0050325, H3GA0001949,<br>ALGA0004093, ASGA0003317,<br>ASGA0003315, MARC0034307,<br>ASGA0083304, ALGA0004143,<br>H3GA0001956, INRA0002819,<br>INRA0002820, ALGA0004148,<br>INRA0002823, ALGA0004169,<br>MARC0021047, ALGA0004173,<br>ASGA0003333, ALGA0004177,<br>H3GA0001966, ASGA0003335,<br>SIRI0000655, ASGA0057312,<br>H3GA0046845 |   |             |   |   |
| Lactic acid    | 0  | 0                                                                                                                                                                                                                                                                                                                                                                                                                                             | 1 | WU_10.2_X_104031384                                                                                                                                                                                                                                                                                                                                                                                                                                                                                                                                   | 0 | 0           | 0 |   |
| LysoPC(16:0)   | 21 | INRA0003881, MARC0046138,<br>ASGA0093565,<br>WU_10.2_6_136216429,<br>WU_10.2_6_136863547,<br>WU_10.2_6_136876717,<br>WU_10.2_6_136972846,<br>H3GA0053559,<br>WU_10.2_17_48295280,<br>ASGA0094610, MARC0027232,<br>WU_10.2_X_103597980,<br>WU_10.2_X_103653646,<br>ASGA0081223,<br>WU_10.2_X_104796075,<br>WU_10.2_X_104910069,<br>WU_10.2_X_104956283,<br>WU_10.2_X_104980830,<br>ALGA0099866,<br>WU_10.2_X_105559450,<br>WU_10.2_X_105583738 | 0 | 0                                                                                                                                                                                                                                                                                                                                                                                                                                                                                                                                                     |   | 0           | 0 | 0 |
| Monosaccharide | 0  | 0                                                                                                                                                                                                                                                                                                                                                                                                                                             | 0 | 0                                                                                                                                                                                                                                                                                                                                                                                                                                                                                                                                                     | 1 | ASGA0095299 | 0 |   |
| Nicotine amide | 0  | 0                                                                                                                                                                                                                                                                                                                                                                                                                                             | 1 | 2_29041727                                                                                                                                                                                                                                                                                                                                                                                                                                                                                                                                            | 0 | 0           | 0 |   |

---

|                    |    |                                                                                                                                                                                                                                                        |     |                                                                                                                                                                                                                                                                                                                                                                                                                                                                                                                                                                                                                                                                                                                                                                                                                                                                                                                           |    |                                                                      |
|--------------------|----|--------------------------------------------------------------------------------------------------------------------------------------------------------------------------------------------------------------------------------------------------------|-----|---------------------------------------------------------------------------------------------------------------------------------------------------------------------------------------------------------------------------------------------------------------------------------------------------------------------------------------------------------------------------------------------------------------------------------------------------------------------------------------------------------------------------------------------------------------------------------------------------------------------------------------------------------------------------------------------------------------------------------------------------------------------------------------------------------------------------------------------------------------------------------------------------------------------------|----|----------------------------------------------------------------------|
| Propionylcarnitine | 4  | ALGA0038416, DRGA0014486,<br>ALGA0081238,<br>WU_10.2_14_132246191                                                                                                                                                                                      | 61  | MARC0027518, DRGA0000994,<br>MARC0063106, H3GA0001865,<br>MARC0068954, ASGA0003182,<br>ALGA0003891, ALGA0003900,<br>DRGA0001072, DRGA0001073,<br>ASGA0003194, MARC0059407,<br>ALGA0003935, ALGA0003952,<br>ALGA0003953, ASGA0003235,<br>INRA0002726, MARC0075306,<br>ALGA0003995, ALGA0004000,<br>ALGA0004002, ALGA0004005,<br>ALGA0004006, ALGA0004024,<br>ALGA0004041, ALGA0004042,<br>ALGA0004046, ALGA0004048,<br>ASGA0003288, H3GA0001937,<br>ALGA0004073, ALGA0004090,<br>ASGA0003312, ASGA0003314,<br>MARC0050325, H3GA0001949,<br>ALGA0004093, ASGA0003317,<br>ASGA0003315, MARC0034307,<br>ASGA0083304, ALGA0004143,<br>H3GA0001956, INRA0002819,<br>INRA0002820, ALGA0004148,<br>INRA0002823, ALGA0004169,<br>MARC0021047, ALGA0004173,<br>ASGA0003333, ALGA0004177,<br>H3GA0001966, ASGA0003335,<br>SIRI0000655, DRGA0004012,<br>WU_10.2_10_71866847,<br>H3GA0035928, ASGA0057312,<br>H3GA0046845, ASGA0078611 | 4  | ALGA0038416,<br>DRGA0014486,<br>ALGA0081238,<br>WU_10.2_14_132246191 |
| Pyruvic acid       | 16 | MARC0110390, ALGA0014130,<br>MARC0080116, ASGA0018324,<br>ALGA0049375, ALGA0049385,<br>MARC0001720, ASGA0042433,<br>H3GA0026947, ASGA0042436,<br>MARC0092124, INRA0031485,<br>M1GA0016778, ALGA0099866,<br>WU_10.2_X_105559450,<br>WU_10.2_X_114649203 | 1   | MARC0023109                                                                                                                                                                                                                                                                                                                                                                                                                                                                                                                                                                                                                                                                                                                                                                                                                                                                                                               | 3  | ASGA0018324,<br>M1GA0016778,<br>WU_10.2_X_114649203                  |
| Total              | 97 |                                                                                                                                                                                                                                                        | 154 |                                                                                                                                                                                                                                                                                                                                                                                                                                                                                                                                                                                                                                                                                                                                                                                                                                                                                                                           | 33 | 0                                                                    |

**Supplementary Table S3.** Top ten SNPs associated with residual feed intake (RFI).

| SNP Name            | Chromosome | Position    | <i>p</i> -Value         | Nearest Gene                     | Gene Description                                                    | Distance |
|---------------------|------------|-------------|-------------------------|----------------------------------|---------------------------------------------------------------------|----------|
| DRGA0008061         | 7          | 110,711,289 | 2.09 × 10 <sup>-4</sup> | NA                               | NA                                                                  | NA       |
| WU_10.2_3_2710244   | 3          | 2,710,244   | 2.76 × 10 <sup>-4</sup> | <i>GRIFIN</i><br>(NM_001145219)  | Galectin-related inter-fiber protein                                | 458,576  |
| ALGA0038510         | 7          | 9,882,571   | 2.83 × 10 <sup>-4</sup> | <i>SIRT5</i><br>(NM_001105308)   | Sirtuin 5                                                           | 445,152  |
| WU_10.2_3_13191193  | 3          | 13,191,193  | 3.18 × 10 <sup>-4</sup> | <i>AUTS2</i><br>(NM_001246269)   | Activator of transcription and developmental regulator <i>AUTS2</i> | 417,999  |
| WU_10.2_3_13390270  | 3          | 13,390,270  | 3.18 × 10 <sup>-4</sup> | <i>AUTS2</i><br>(NM_001246269)   | Activator of transcription and developmental regulator <i>AUTS2</i> | 218,922  |
| H3GA0005011         | 1          | 301,750,612 | 3.31 × 10 <sup>-4</sup> | <i>ANGPTL2</i><br>(NM_001109946) | Angiopoietin like 2                                                 | 175,995  |
| M1GA0001651         | 1          | 301,911,374 | 3.31 × 10 <sup>-4</sup> | <i>PTRH1</i><br>(NM_001258431)   | Peptidyl-tRNA hydrolase 1 homolog                                   | 194,106  |
| WU_10.2_1_302080876 | 1          | 302,080,876 | 3.31 × 10 <sup>-4</sup> | <i>PTRH1</i><br>(NM_001258431)   | Peptidyl-tRNA hydrolase 1 homolog                                   | 24,604   |
| ALGA0010572         | 1          | 302,086,585 | 3.31 × 10 <sup>-4</sup> | <i>PTRH1</i><br>(NM_001258431)   | Peptidyl-tRNA hydrolase 1 homolog                                   | 18,895   |
| ASGA0035769         | 7          | 108,716,194 | 3.33 × 10 <sup>-4</sup> | NA                               | NA                                                                  | NA       |



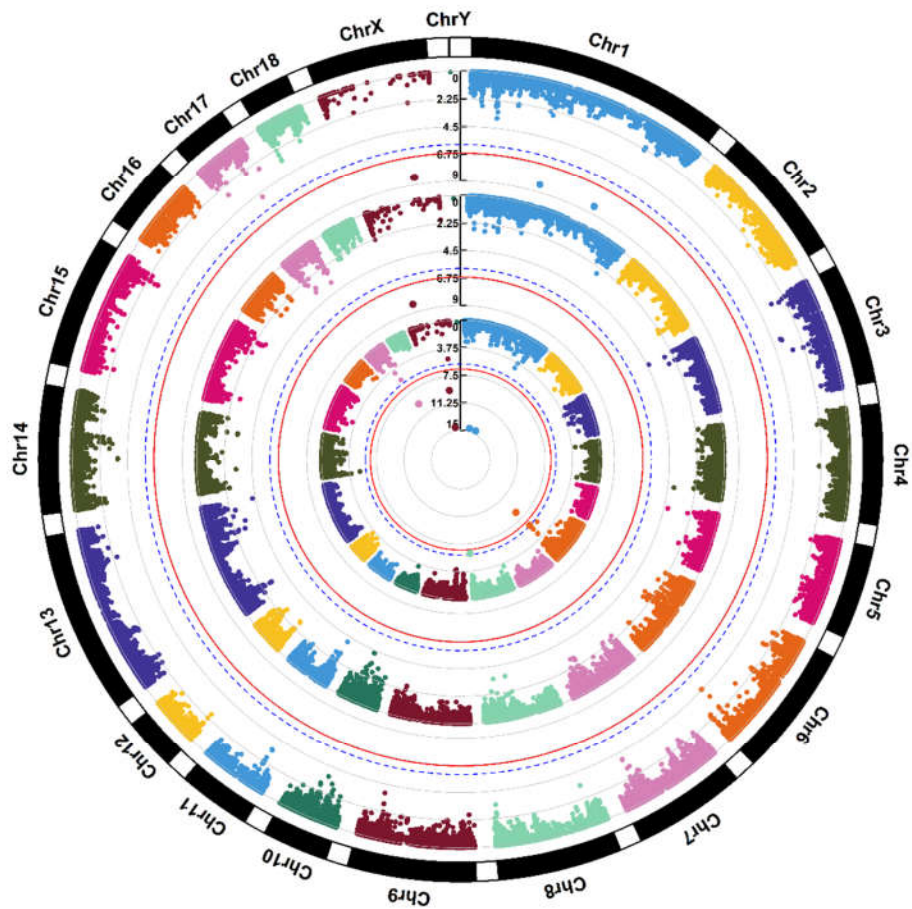

**Supplementary Figure S1.1.** Manhattan plots of genome-wide association for 1-hexadecyl-sn-glycero-3-phosphocholine (M1). Note: Y-axis indicates the  $\log_{10}(p\text{-value})$ . Blue dotted and red solid lines indicate the genome-wide threshold of 0.05 and 0.01 after Bonferroni multiple testing, respectively. The three tracks indicate the metabolites from first sampling time, second sampling time, and combined two sampling times from outside to inside.

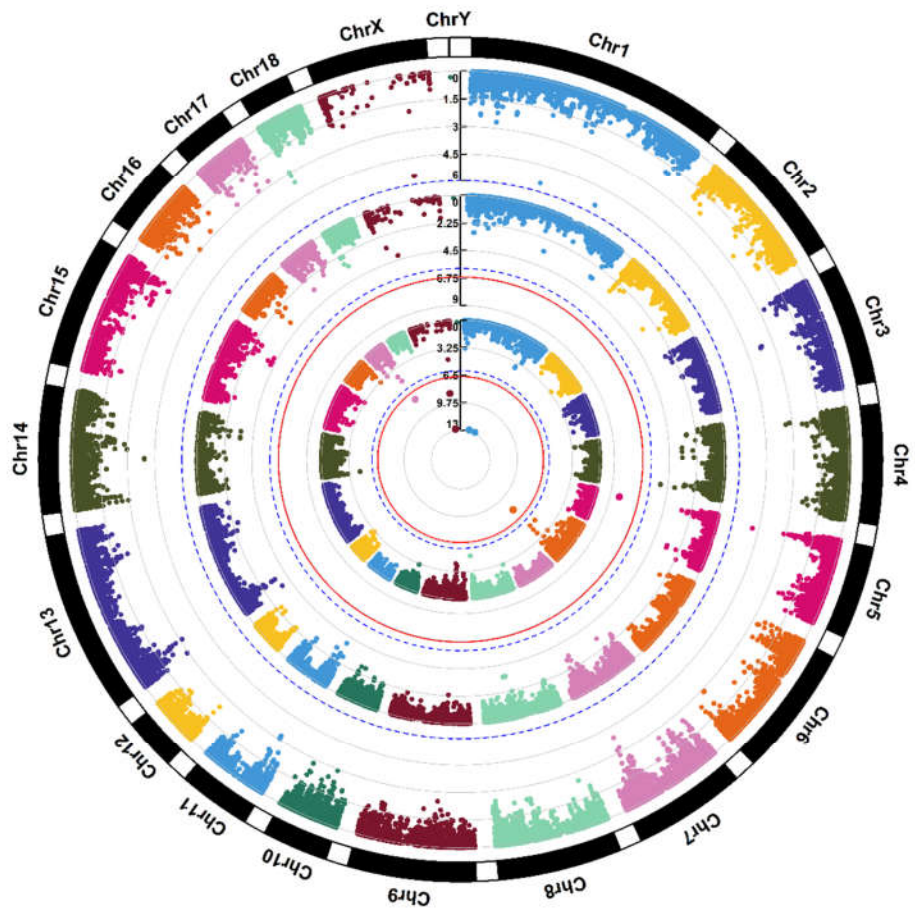

**Supplementary Figure S1.2.** Manhattan plots of genome-wide association for 1-myristoyl-sn-glycero-3-phosphocholine (M2). Note: Y-axis indicates the  $\log_{10}(p\text{-value})$ . Blue dotted and red solid lines indicate the genome-wide threshold of 0.05 and 0.01 after Bonferroni multiple testing, respectively. The three tracks indicate the metabolites from first sampling time, second sampling time, and combined two sampling times from outside to inside.

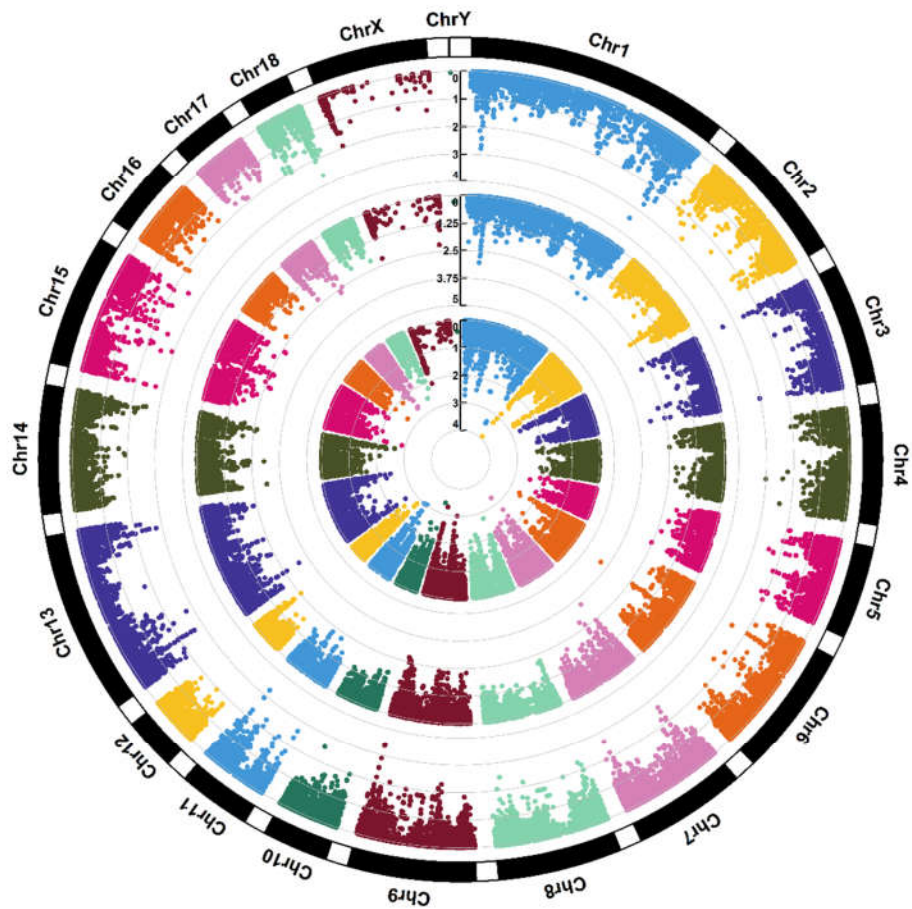

**Supplementary Figure S1.3.** Manhattan plots of genome-wide association for trimethylammonium (M3). Note: Y-axis indicates the  $\log_{10}(p\text{-value})$ . Blue dotted and red solid lines indicate the genome-wide threshold of 0.05 and 0.01 after Bonferroni multiple testing, respectively. The three tracks indicate the metabolites from first sampling time, second sampling time, and combined two sampling times from outside to inside.

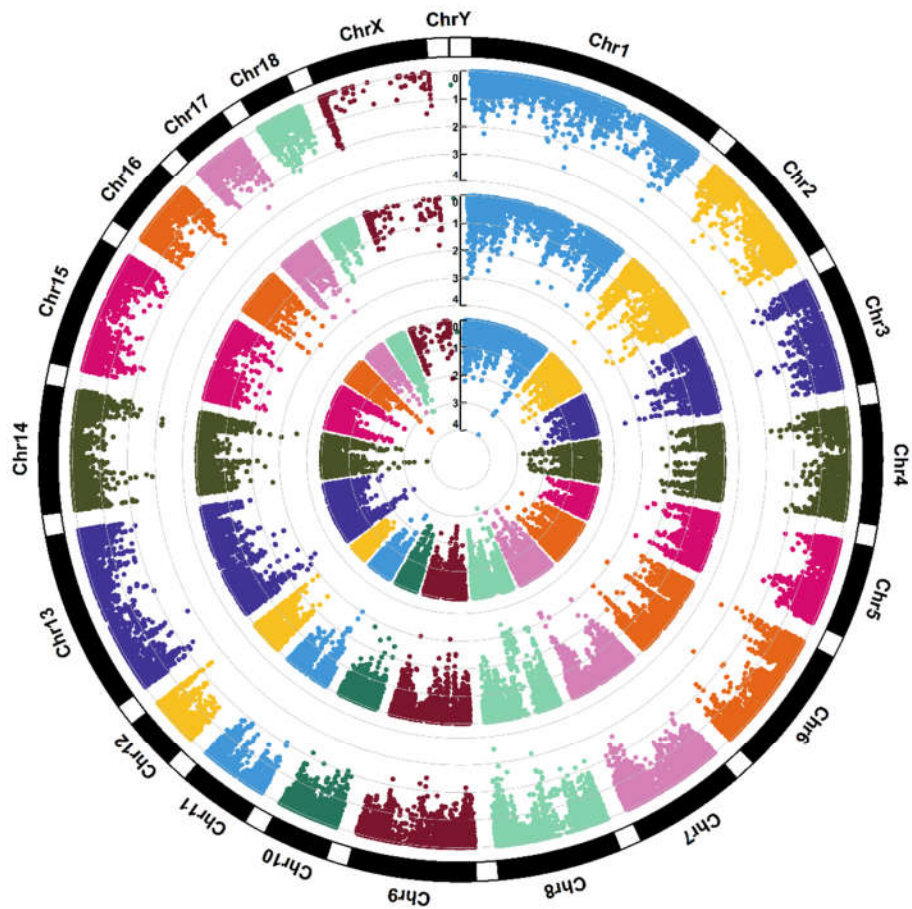

**Supplementary Figure S1.4.** Manhattan plots of genome-wide association for 4-aminobenzoic acid (M4). Note: Y-axis indicates the  $\log_{10}(p\text{-value})$ . Blue dotted and red solid lines indicate the genome-wide threshold of 0.05 and 0.01 after Bonferroni multiple testing, respectively. The three tracks indicate the metabolites from first sampling time, second sampling time, and combined two sampling times from outside to inside.

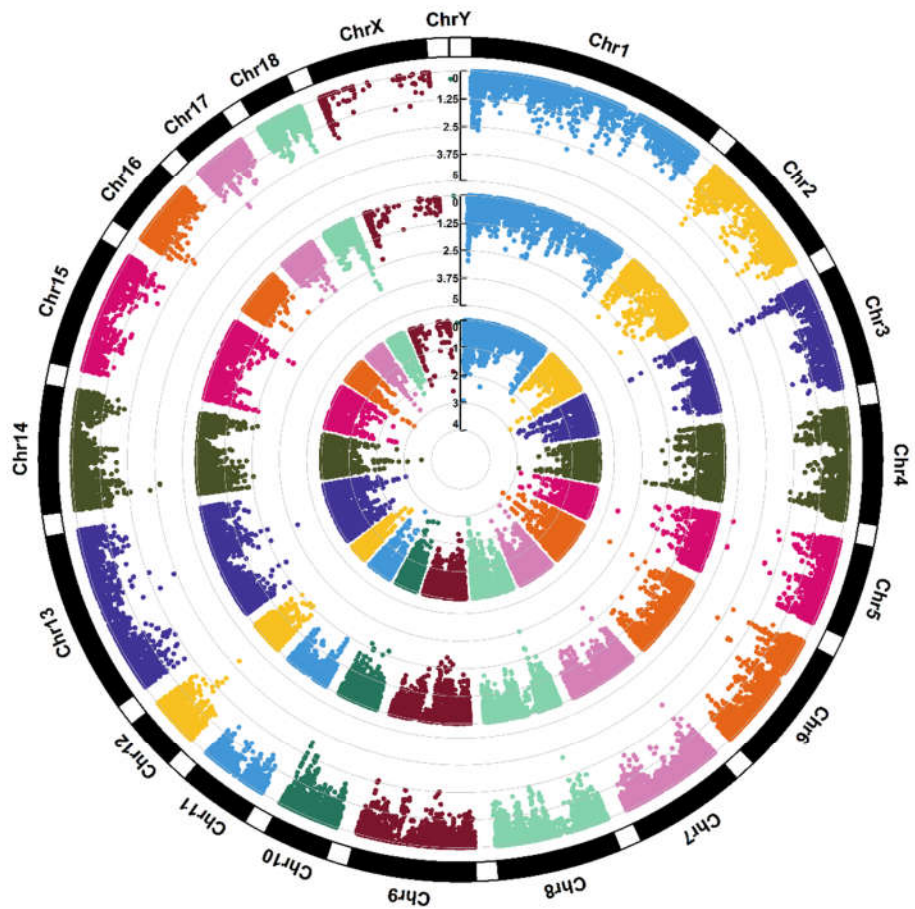

**Supplementary Figure S1.5.** Manhattan plots of genome-wide association for 5-methyl-5,6-dihydrouracils (M5). Note: Y-axis indicates the  $\log_{10}(p\text{-value})$ . Blue dotted and red solid lines indicate the genome-wide threshold of 0.05 and 0.01 after Bonferroni multiple testing, respectively. The three tracks indicate the metabolites from first sampling time, second sampling time, and combined two sampling times from outside to inside.

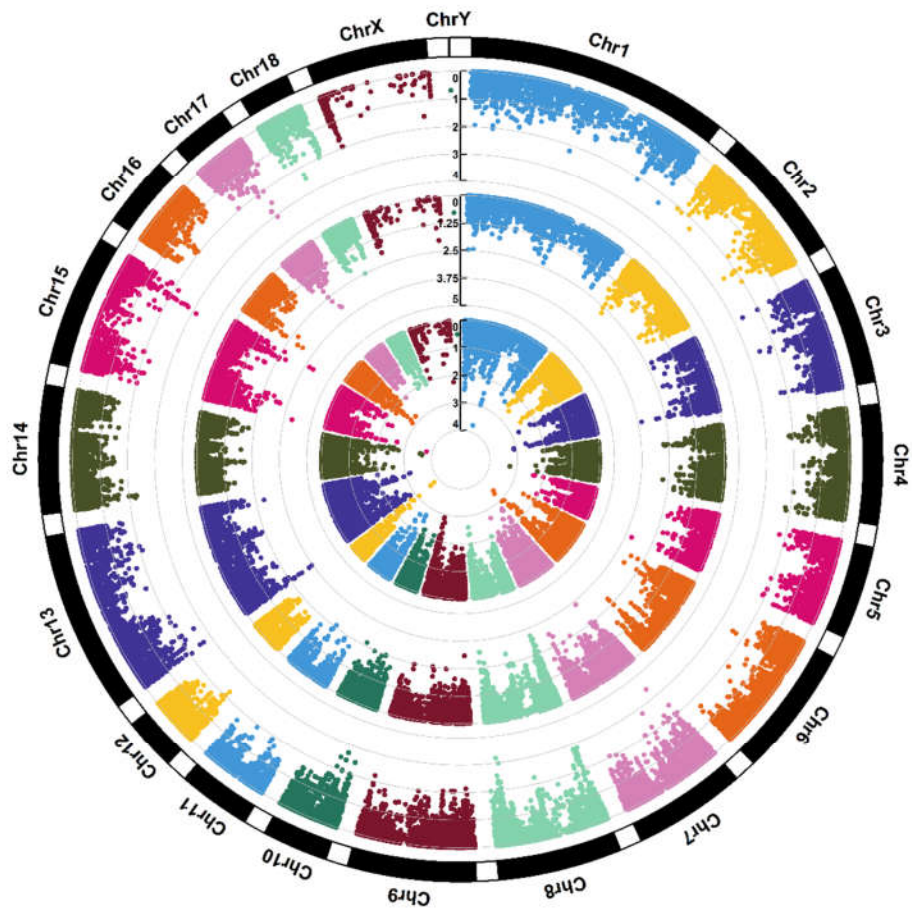

**Supplementary Figure S1.6.** Manhattan plots of genome-wide association for acetaminophen (M6). Note: Y-axis indicates the  $\log_{10}(p\text{-value})$ . Blue dotted and red solid lines indicate the genome-wide threshold of 0.05 and 0.01 after Bonferroni multiple testing, respectively. The three tracks indicate the metabolites from first sampling time, second sampling time, and combined two sampling times from outside to inside.

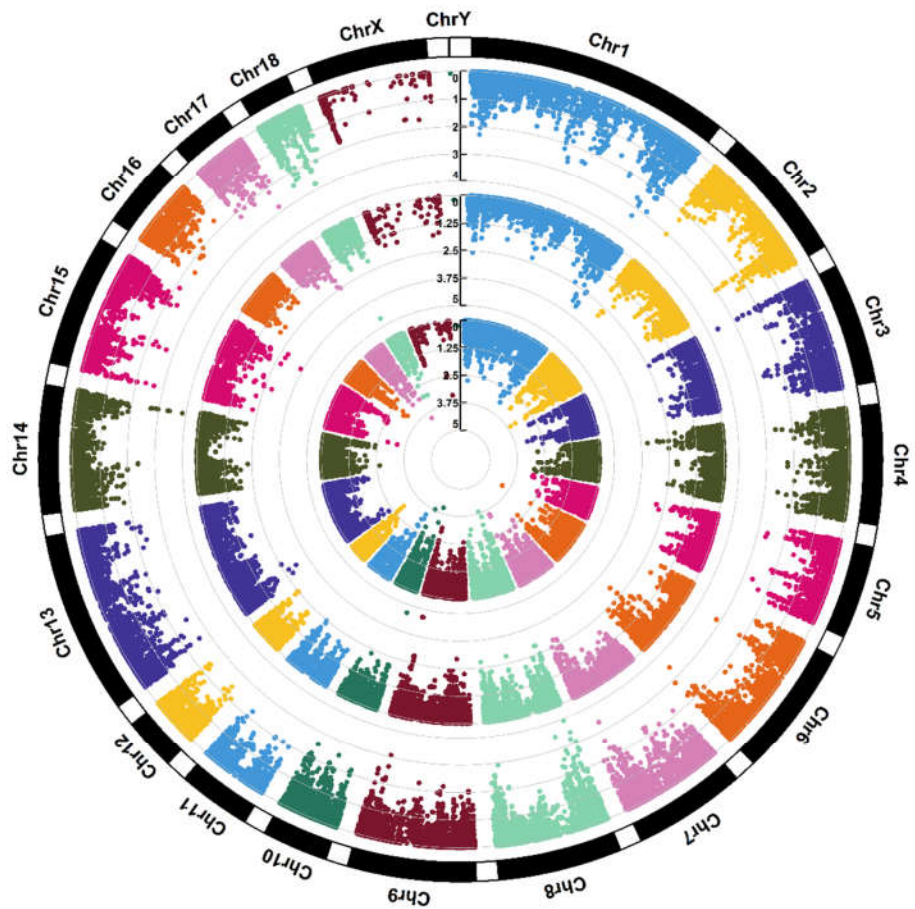

**Supplementary Figure S1.7.** Manhattan plots of genome-wide association for acetylcarnitine (M7). Note: Y-axis indicates the  $\log_{10}(p\text{-value})$ . Blue dotted and red solid lines indicate the genome-wide threshold of 0.05 and 0.01 after Bonferroni multiple testing, respectively. The three tracks indicate the metabolites from first sampling time, second sampling time, and combined two sampling times from outside to inside.

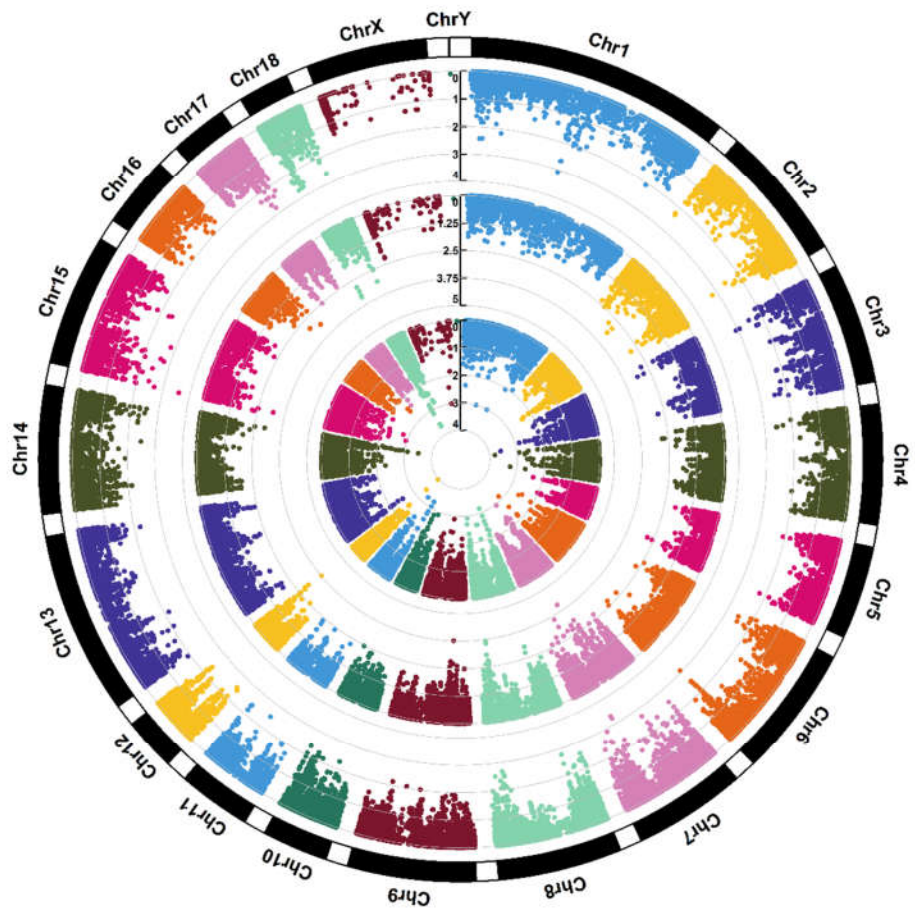

**Supplementary Figure S1.8.** Manhattan plots of genome-wide association for alanine (M8). Note: Y-axis indicates the  $\log_{10}(p\text{-value})$ . Blue dotted and red solid lines indicate the genome-wide threshold of 0.05 and 0.01 after Bonferroni multiple testing, respectively. The three tracks indicate the metabolites from first sampling time, second sampling time, and combined two sampling times from outside to inside.



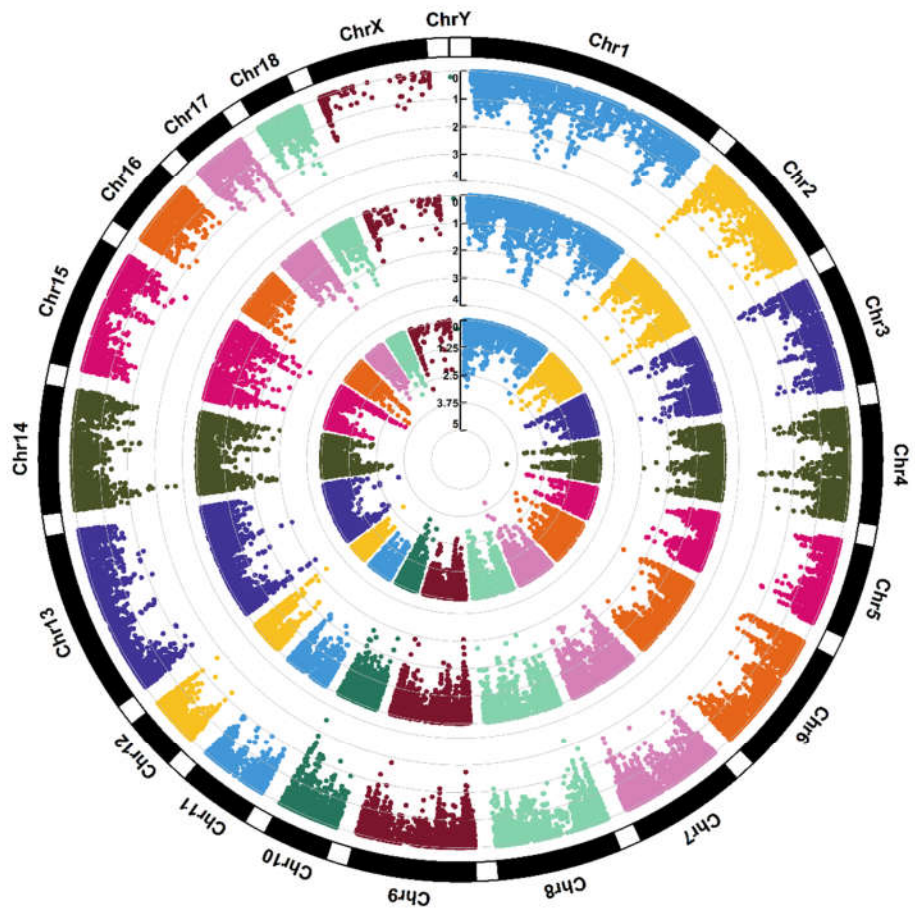

**Supplementary Figure S1.9.** Manhattan plots of genome-wide association for arginine (M9). Note: Y-axis indicates the  $\log_{10}(p\text{-value})$ . Blue dotted and red solid lines indicate the genome-wide threshold of 0.05 and 0.01 after Bonferroni multiple testing, respectively. The three tracks indicate the metabolites from first sampling time, second sampling time, and combined two sampling times from outside to inside.

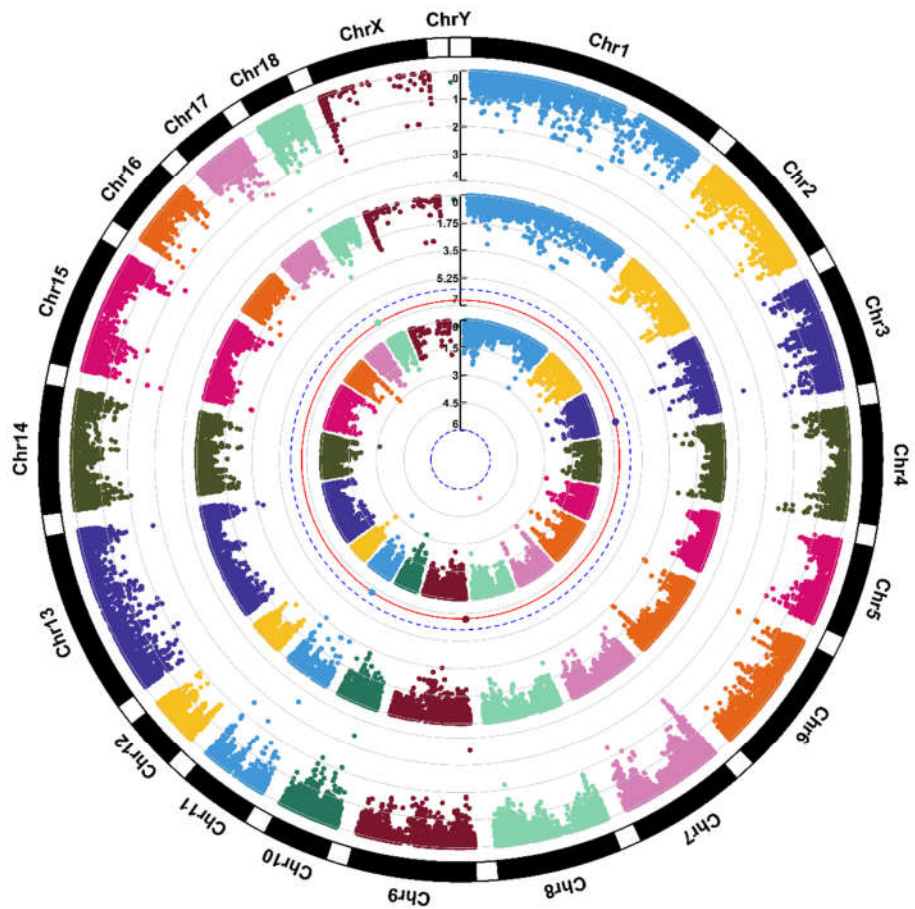

**Supplementary Figure S1.10.** Manhattan plots of genome-wide association for aspartic acid (M10). Note: Y-axis indicates the  $\log_{10}(p\text{-value})$ . Blue dotted and red solid lines indicate the genome-wide threshold of 0.05 and 0.01 after Bonferroni multiple testing, respectively. The three tracks indicate the metabolites from first sampling time, second sampling time, and combined two sampling times from outside to inside.

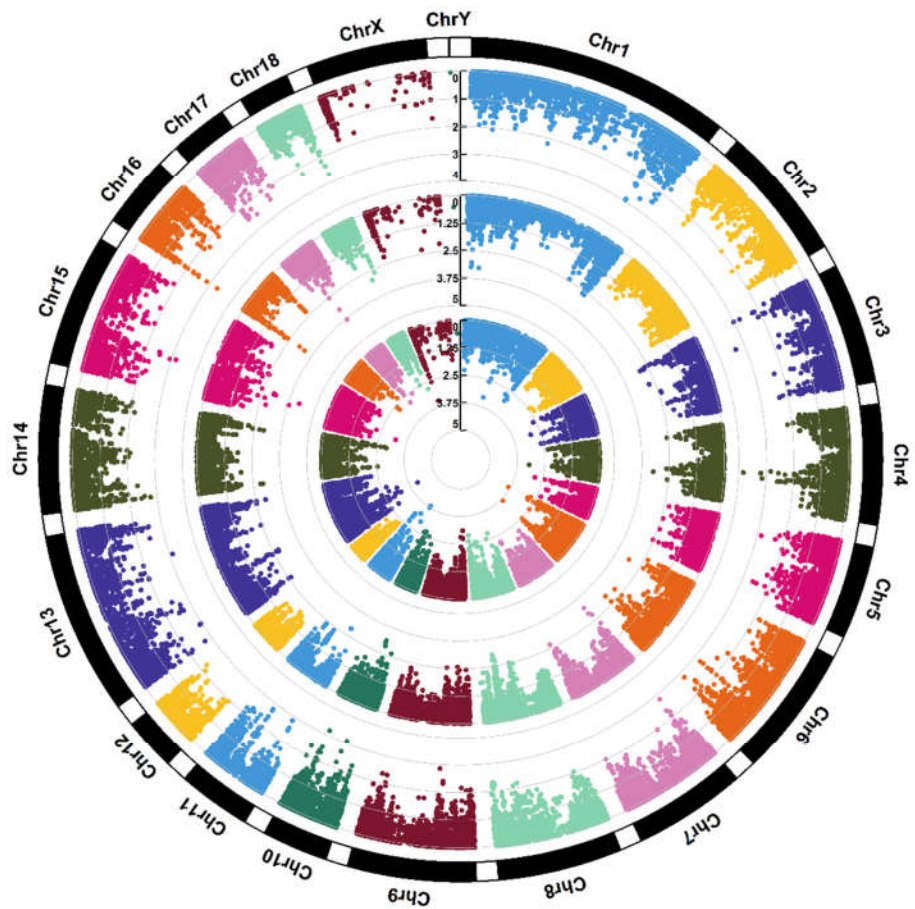

**Supplementary Figure S1.11.** Manhattan plots of genome-wide association for benzoic acid (M11). Note: Y-axis indicates the  $\log_{10}(p\text{-value})$ . Blue dotted and red solid lines indicate the genome-wide threshold of 0.05 and 0.01 after Bonferroni multiple testing, respectively. The three tracks indicate the metabolites from first sampling time, second sampling time, and combined two sampling times from outside to inside.

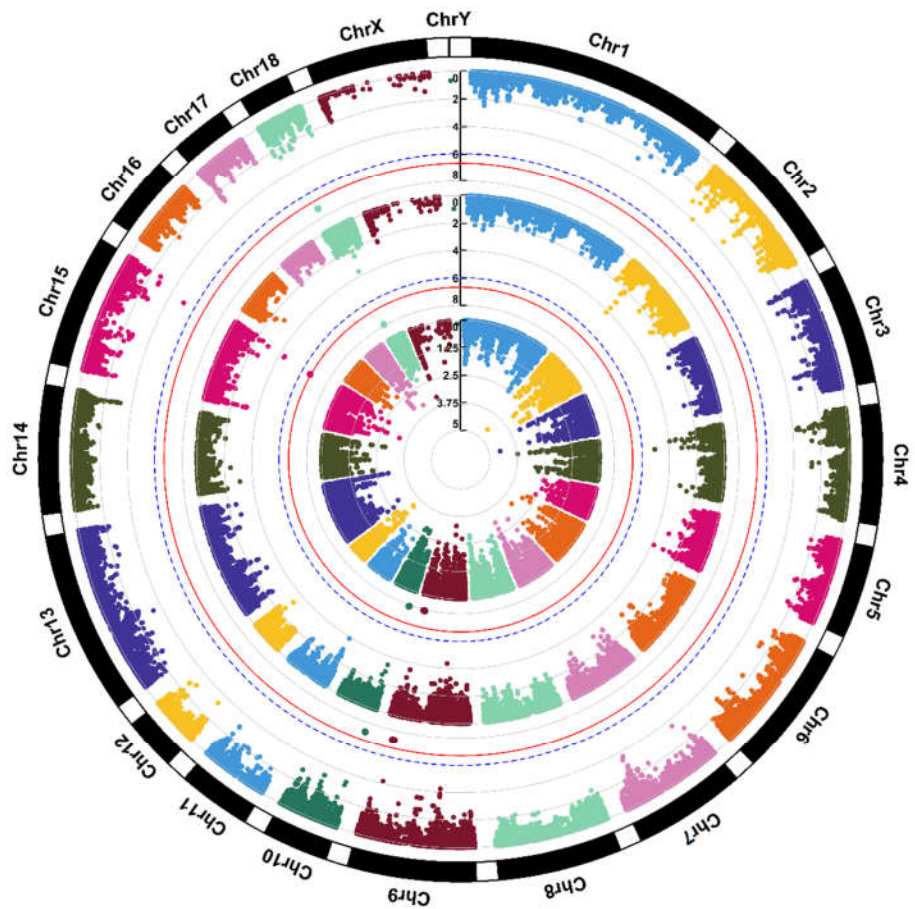

**Supplementary Figure S1.12.** Manhattan plots of genome-wide association for carnitine (M12). Note: Y-axis indicates the  $\log_{10}(p\text{-value})$ . Blue dotted and red solid lines indicate the genome-wide threshold of 0.05 and 0.01 after Bonferroni multiple testing, respectively. The three tracks indicate the metabolites from first sampling time, second sampling time, and combined two sampling times from outside to inside.

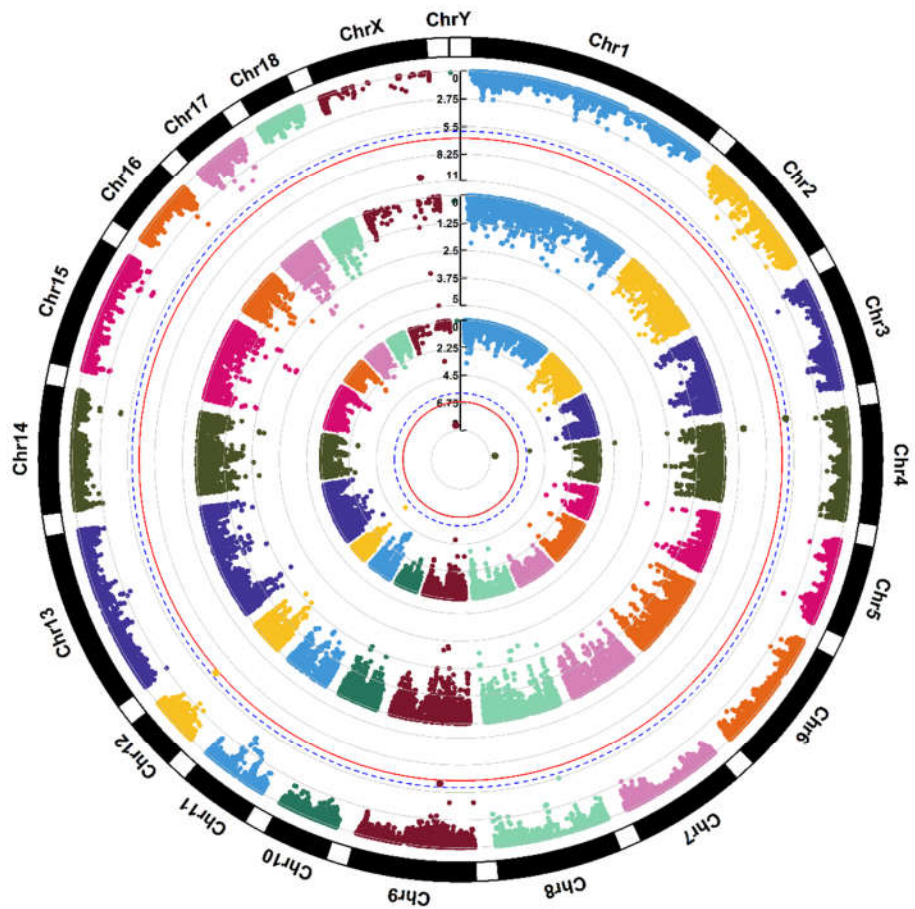

**Supplementary Figure S1.13.** Manhattan plots of genome-wide association for citrulline (M13). Note: Y-axis indicates the  $\log_{10}(p\text{-value})$ . Blue dotted and red solid lines indicate the genome-wide threshold of 0.05 and 0.01 after Bonferroni multiple testing, respectively. The three tracks indicate the metabolites from first sampling time, second sampling time, and combined two sampling times from outside to inside.

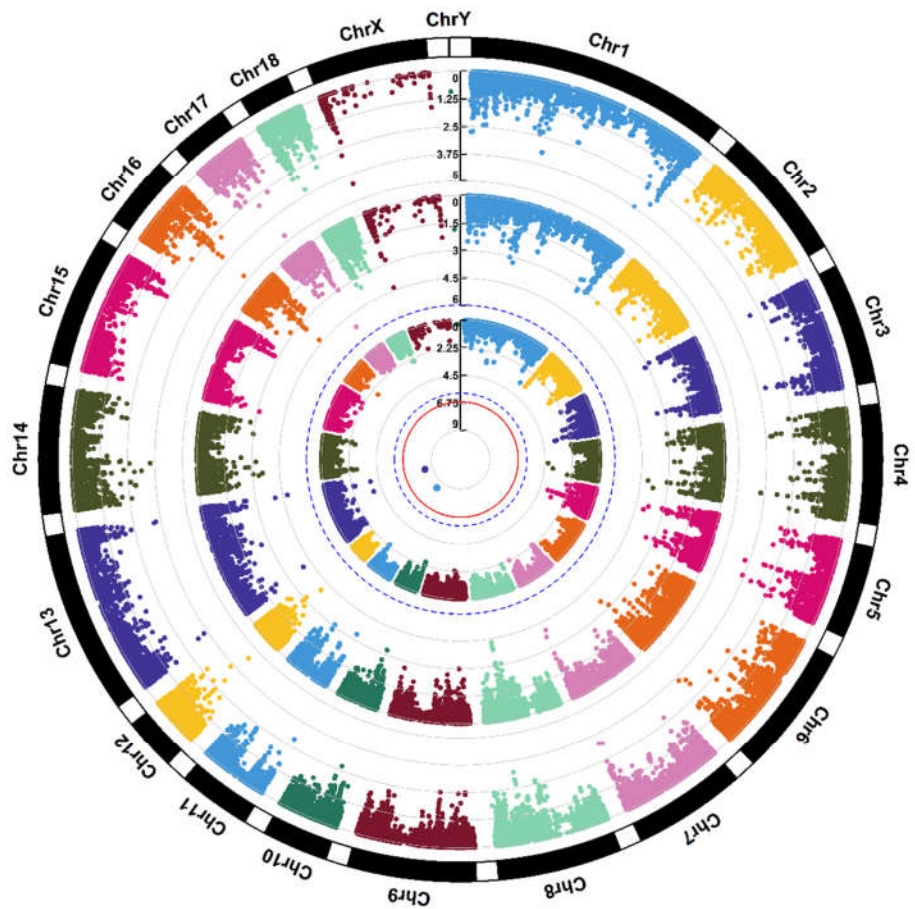

**Supplementary Figure S1.14.** Manhattan plots of genome-wide association for cotinine (M14). Note: Y-axis indicates the  $\log_{10}(p\text{-value})$ . Blue dotted and red solid lines indicate the genome-wide threshold of 0.05 and 0.01 after Bonferroni multiple testing, respectively. The three tracks indicate the metabolites from first sampling time, second sampling time, and combined two sampling times from outside to inside.

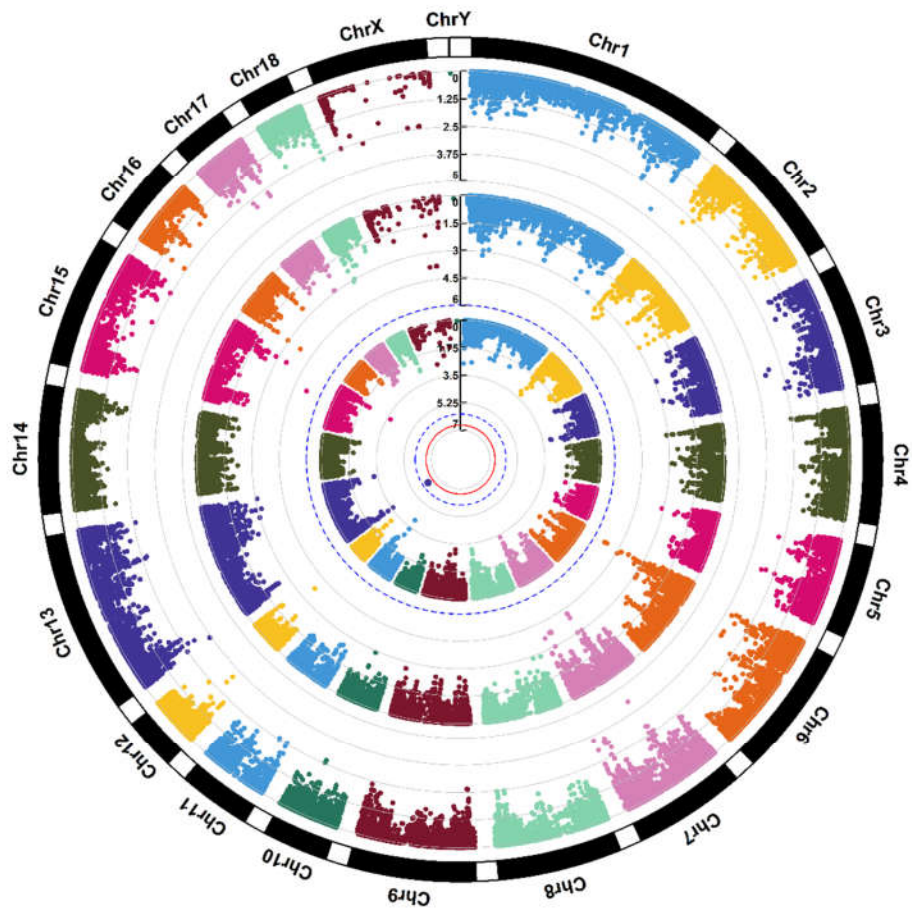

**Supplementary Figure S1.15.** Manhattan plots of genome-wide association for creatinine (M15). Note: Y-axis indicates the  $\log_{10}(p\text{-value})$ . Blue dotted and red solid lines indicate the genome-wide threshold of 0.05 and 0.01 after Bonferroni multiple testing, respectively. The three tracks indicate the metabolites from first sampling time, second sampling time, and combined two sampling times from outside to inside.

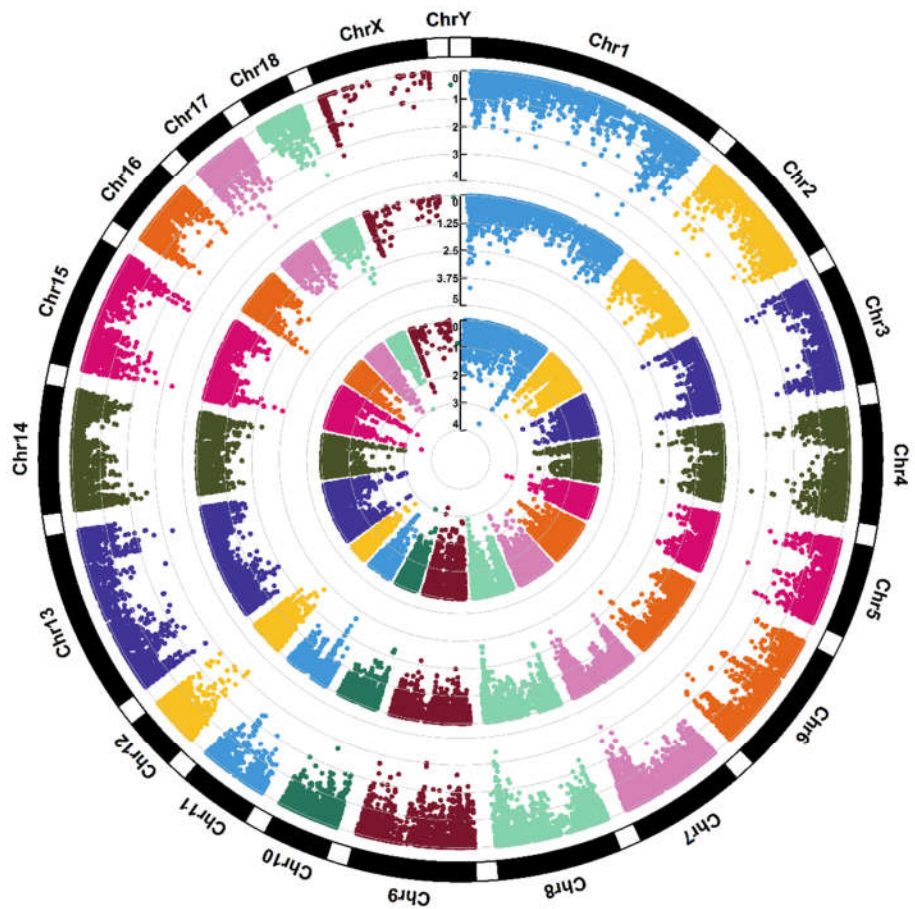

**Supplementary Figure S1.16.** Manhattan plots of genome-wide association for cytidine (M16). Note: Y-axis indicates the  $\log_{10}(p\text{-value})$ . Blue dotted and red solid lines indicate the genome-wide threshold of 0.05 and 0.01 after Bonferroni multiple testing, respectively. The three tracks indicate the metabolites from first sampling time, second sampling time, and combined two sampling times from outside to inside.



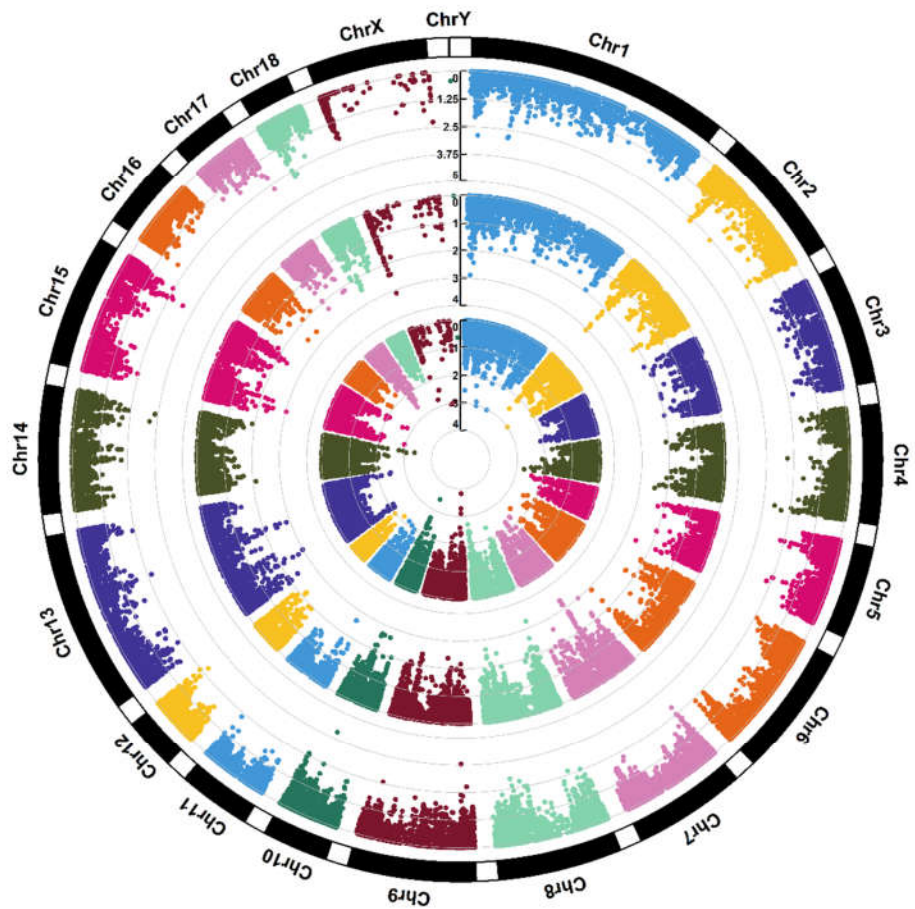

**Supplementary Figure S1.17.** Manhattan plots of genome-wide association for disaccharide (M17). Note: Y-axis indicates the  $\log_{10}(p\text{-value})$ . Blue dotted and red solid lines indicate the genome-wide threshold of 0.05 and 0.01 after Bonferroni multiple testing, respectively. The three tracks indicate the metabolites from first sampling time, second sampling time, and combined two sampling times from outside to inside.

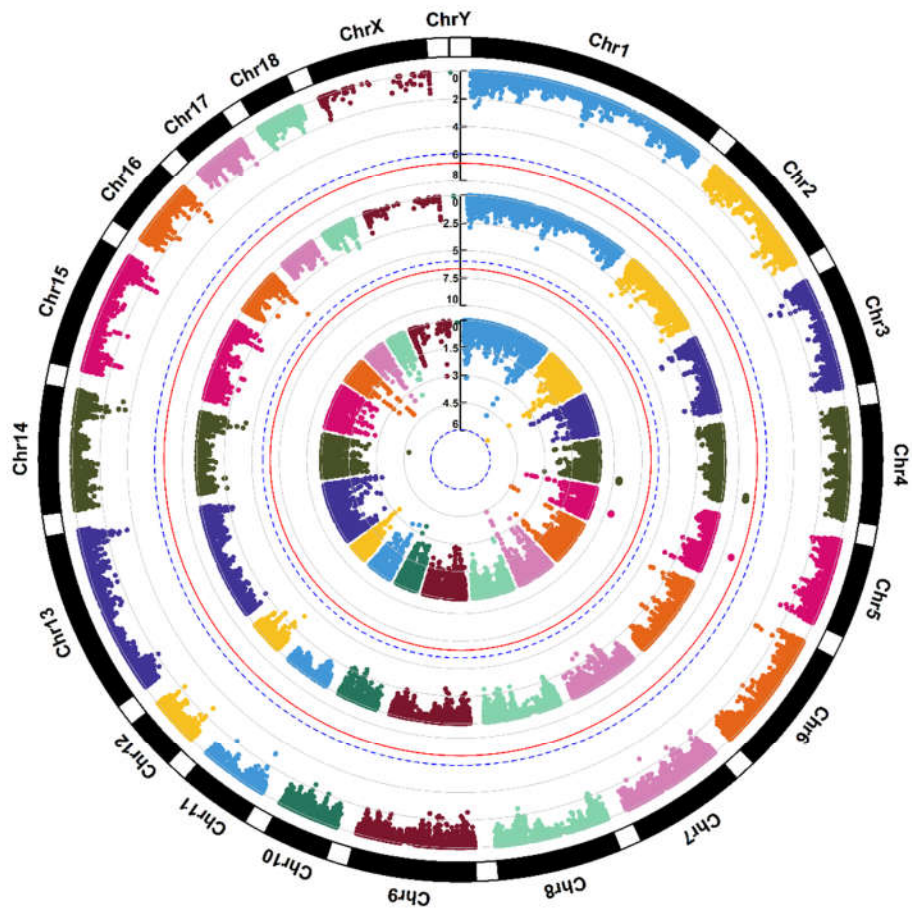

**Supplementary Figure S1.18.** Manhattan plots of genome-wide association for glutamic acid (M18). Note: Y-axis indicates the  $\log_{10}(p\text{-value})$ . Blue dotted and red solid lines indicate the genome-wide threshold of 0.05 and 0.01 after Bonferroni multiple testing, respectively. The three tracks indicate the metabolites from first sampling time, second sampling time, and combined two sampling times from outside to inside.

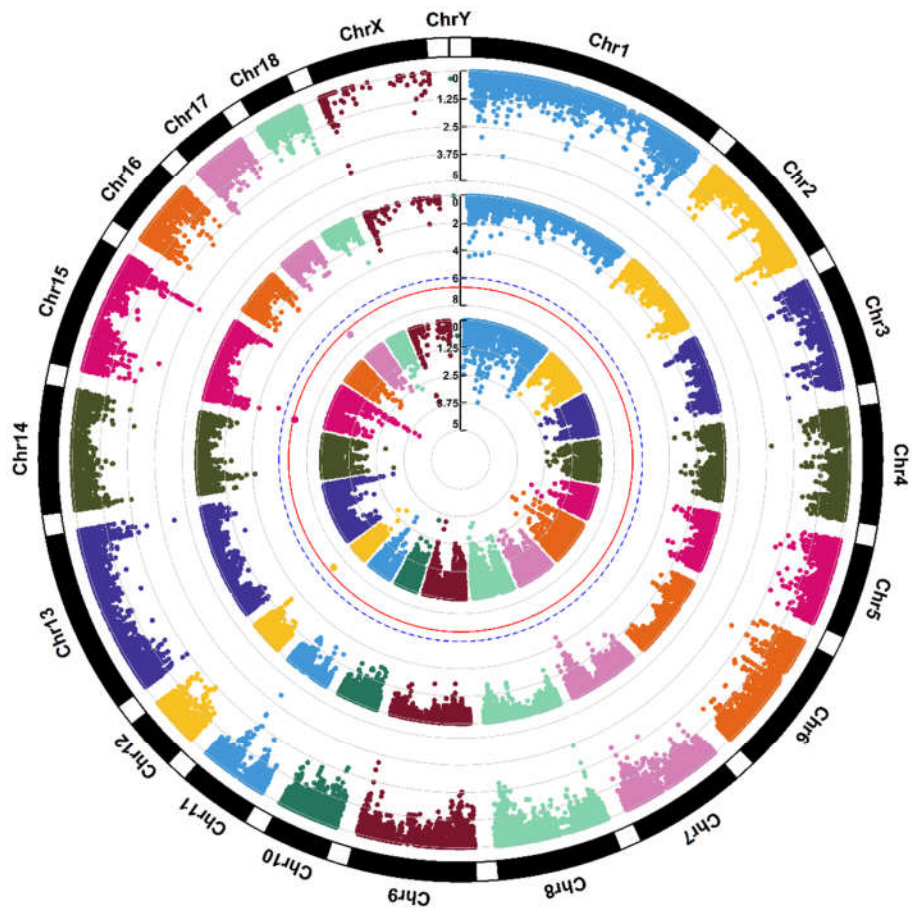

**Supplementary Figure S1.19.** Manhattan plots of genome-wide association for guanine (M19). Note: Y-axis indicates the  $\log_{10}(p\text{-value})$ . Blue dotted and red solid lines indicate the genome-wide threshold of 0.05 and 0.01 after Bonferroni multiple testing, respectively. The three tracks indicate the metabolites from first sampling time, second sampling time, and combined two sampling times from outside to inside.

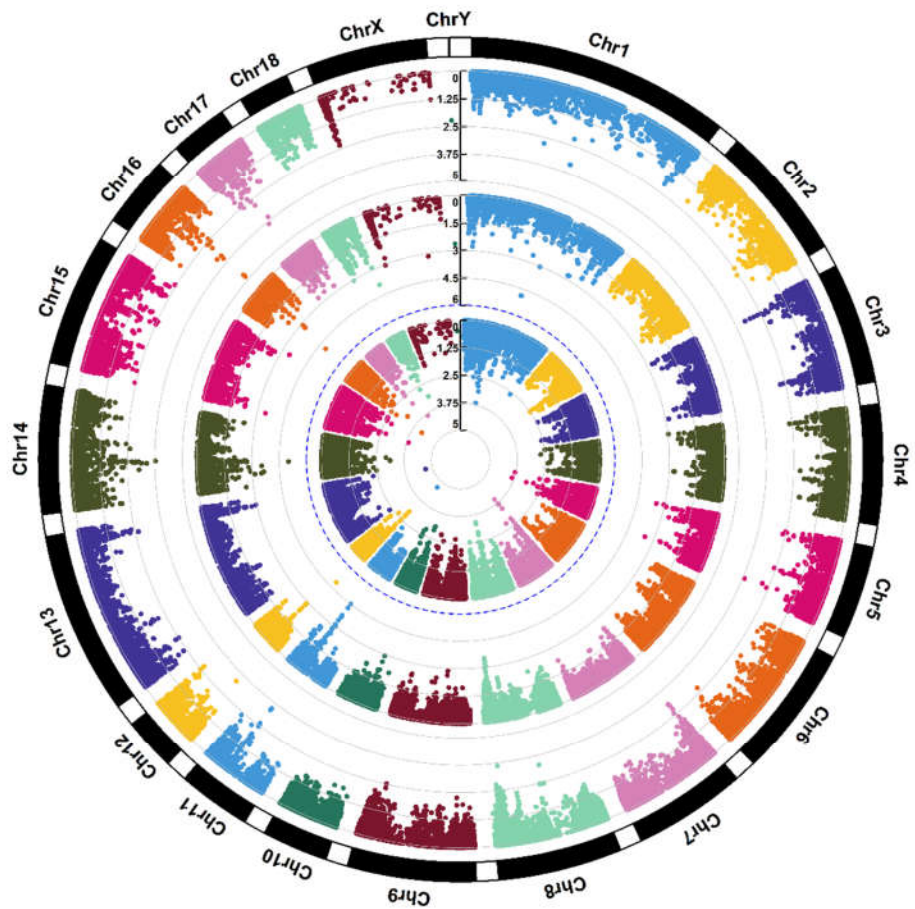

**Supplementary Figure S1.20.** Manhattan plots of genome-wide association for guanosine (M20). Note: Y-axis indicates the  $\log_{10}(p\text{-value})$ . Blue dotted and red solid lines indicate the genome-wide threshold of 0.05 and 0.01 after Bonferroni multiple testing, respectively. The three tracks indicate the metabolites from first sampling time, second sampling time, and combined two sampling times from outside to inside.

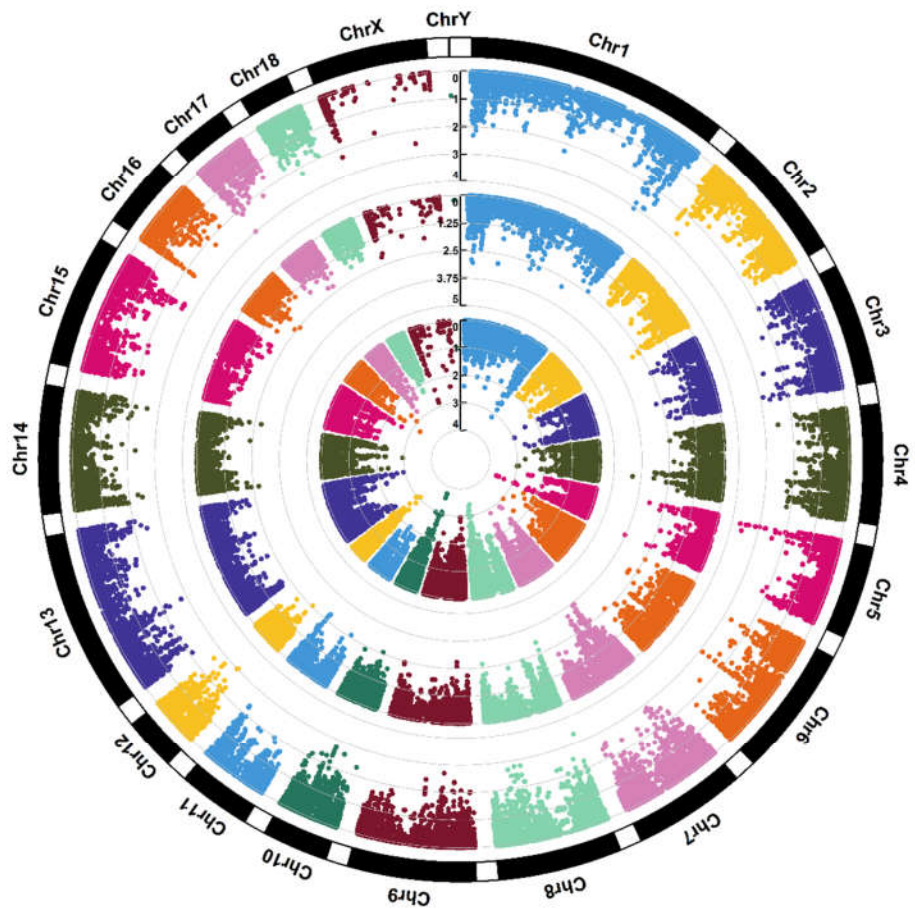

**Supplementary Figure S1.21.** Manhattan plots of genome-wide association for hypoxanthine (M21). Note: Y-axis indicates the  $\log_{10}(p\text{-value})$ . Blue dotted and red solid lines indicate the genome-wide threshold of 0.05 and 0.01 after Bonferroni multiple testing, respectively. The three tracks indicate the metabolites from first sampling time, second sampling time, and combined two sampling times from outside to inside.

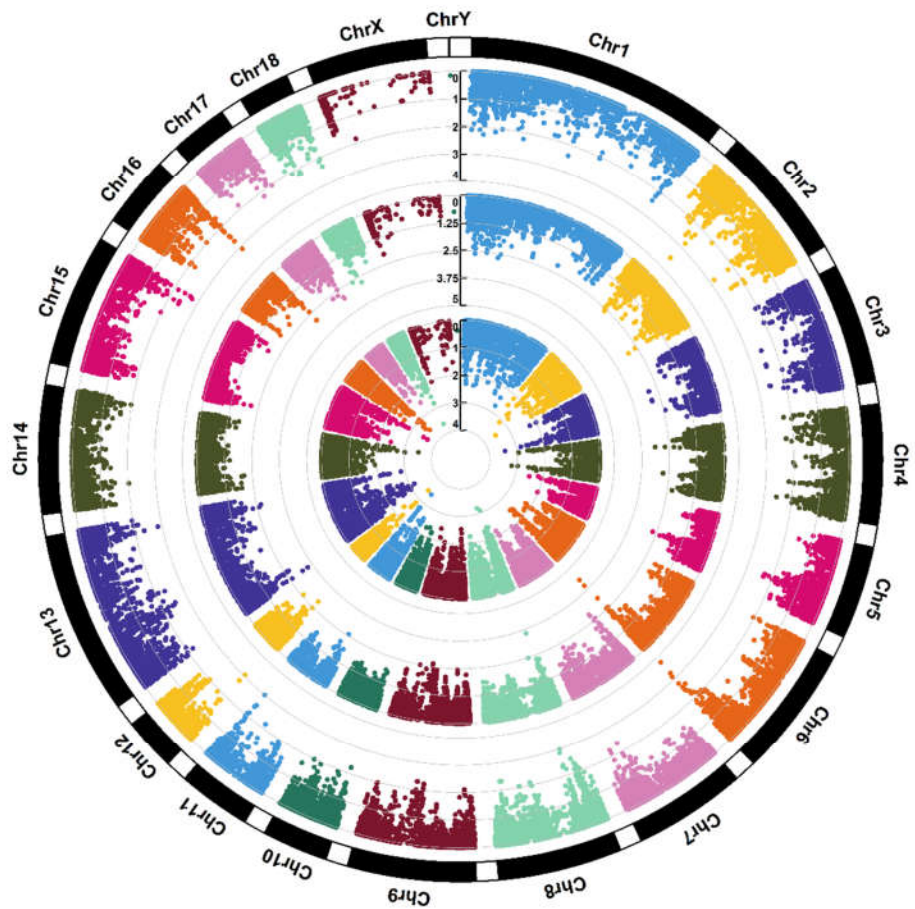

**Supplementary Figure S1.22.** Manhattan plots of genome-wide association for indoleacrylic acid (M22). Note: Y-axis indicates the  $\log_{10}(p\text{-value})$ . Blue dotted and red solid lines indicate the genome-wide threshold of 0.05 and 0.01 after Bonferroni multiple testing, respectively. The three tracks indicate the metabolites from first sampling time, second sampling time, and combined two sampling times from outside to inside.

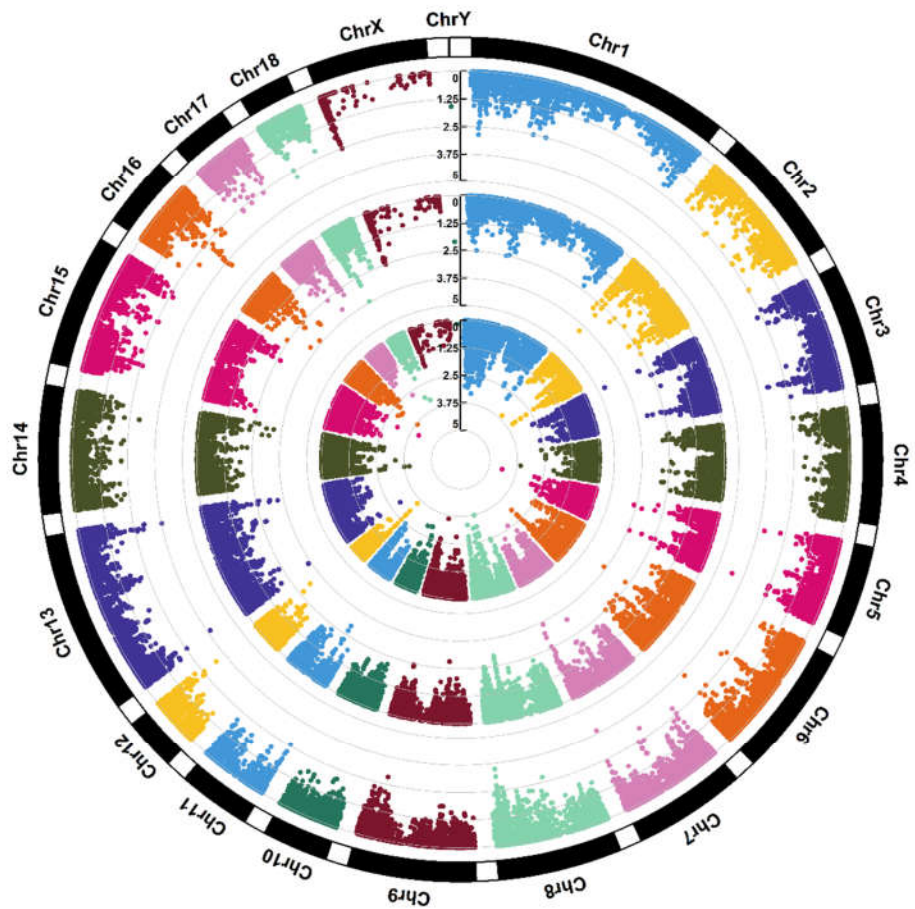

**Supplementary Figure S1.23.** Manhattan plots of genome-wide association for inosine (M23). Note: Y-axis indicates the  $\log_{10}(p\text{-value})$ . Blue dotted and red solid lines indicate the genome-wide threshold of 0.05 and 0.01 after Bonferroni multiple testing, respectively. The three tracks indicate the metabolites from first sampling time, second sampling time, and combined two sampling times from outside to inside.

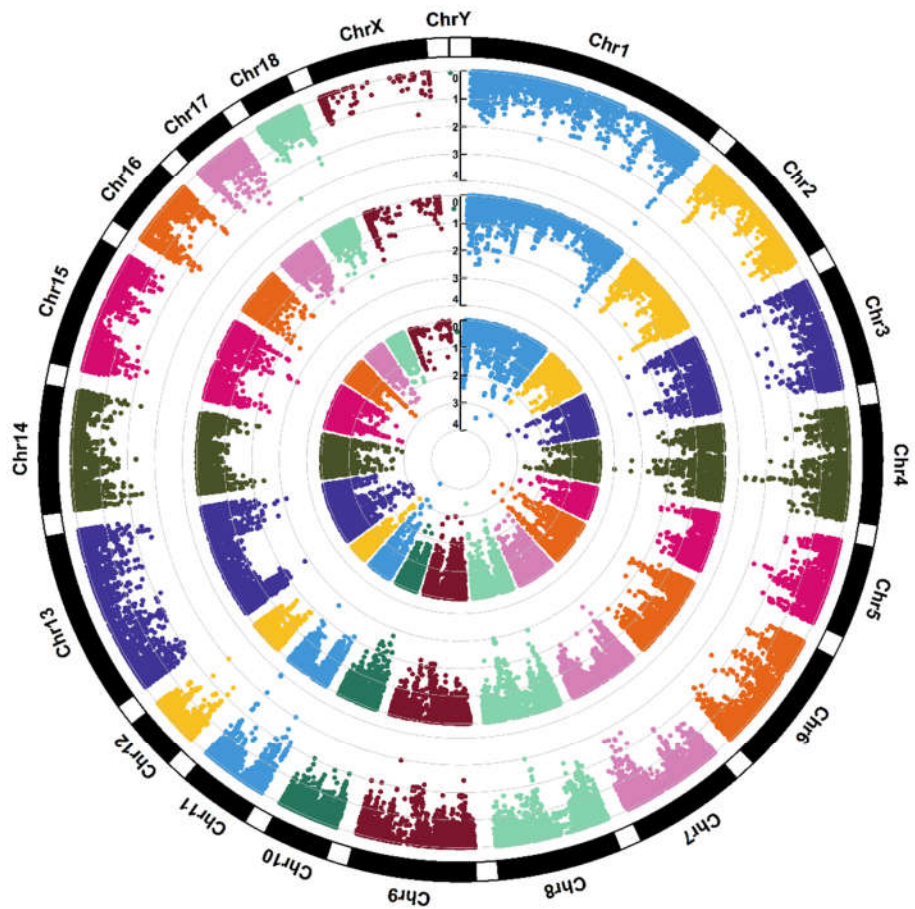

**Supplementary Figure S1.24.** Manhattan plots of genome-wide association for isoleucine (M24). Note: Y-axis indicates the  $\log_{10}(p\text{-value})$ . Blue dotted and red solid lines indicate the genome-wide threshold of 0.05 and 0.01 after Bonferroni multiple testing, respectively. The three tracks indicate the metabolites from first sampling time, second sampling time, and combined two sampling times from outside to inside.



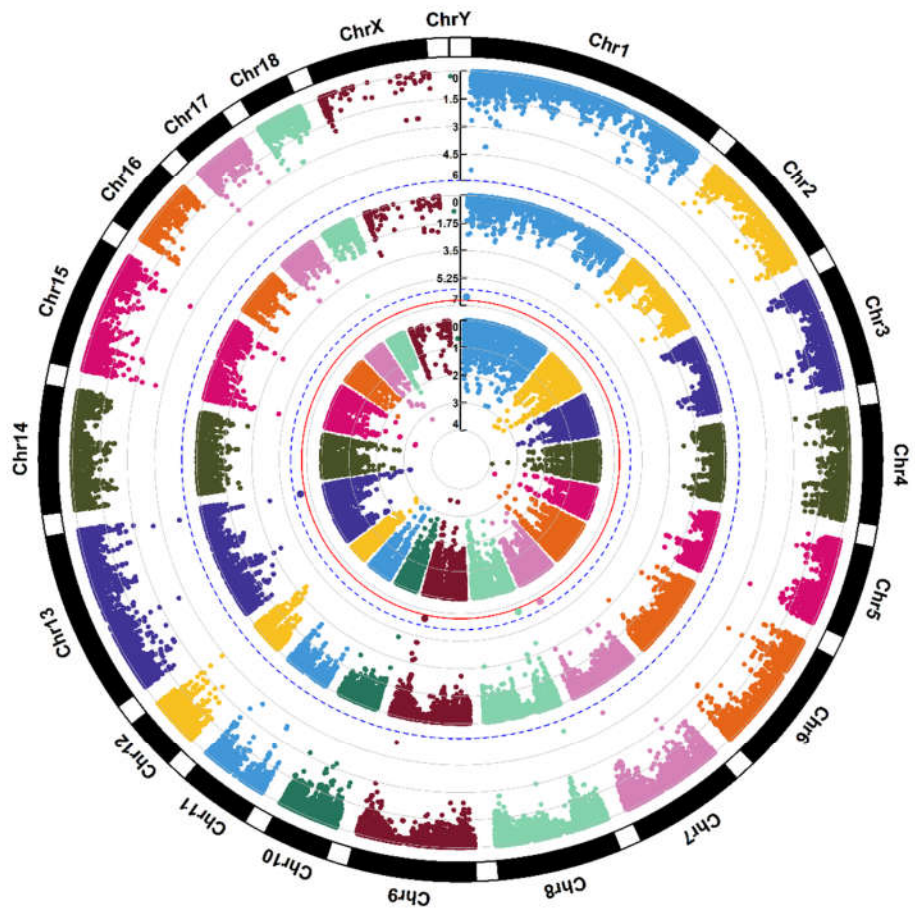

**Supplementary Figure S1.25.** Manhattan plots of genome-wide association for isoleucyl proline (M25). Note: Y-axis indicates the  $\log_{10}(p\text{-value})$ . Blue dotted and red solid lines indicate the genome-wide threshold of 0.05 and 0.01 after Bonferroni multiple testing, respectively. The three tracks indicate the metabolites from first sampling time, second sampling time, and combined two sampling times from outside to inside.

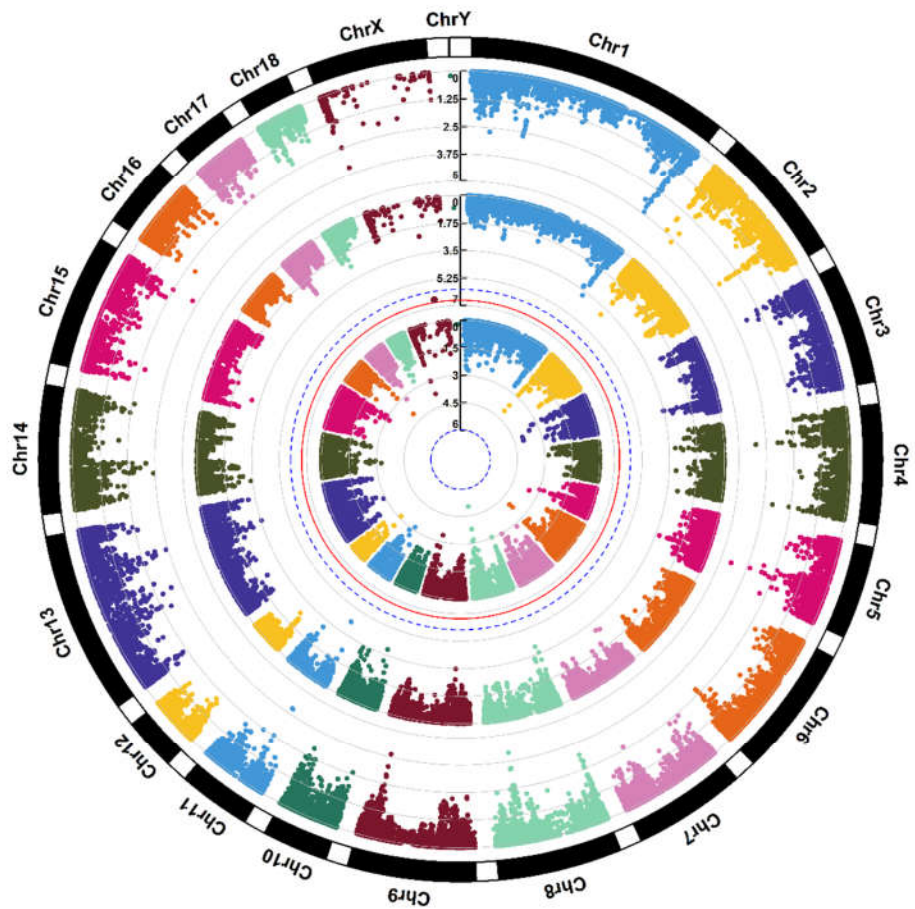

**Supplementary Figure S1.26.** Manhattan plots of genome-wide association for lactic acid (M27). Note: Y-axis indicates the  $\log_{10}(p\text{-value})$ . Blue dotted and red solid lines indicate the genome-wide threshold of 0.05 and 0.01 after Bonferroni multiple testing, respectively. The three tracks indicate the metabolites from first sampling time, second sampling time, and combined two sampling times from outside to inside.

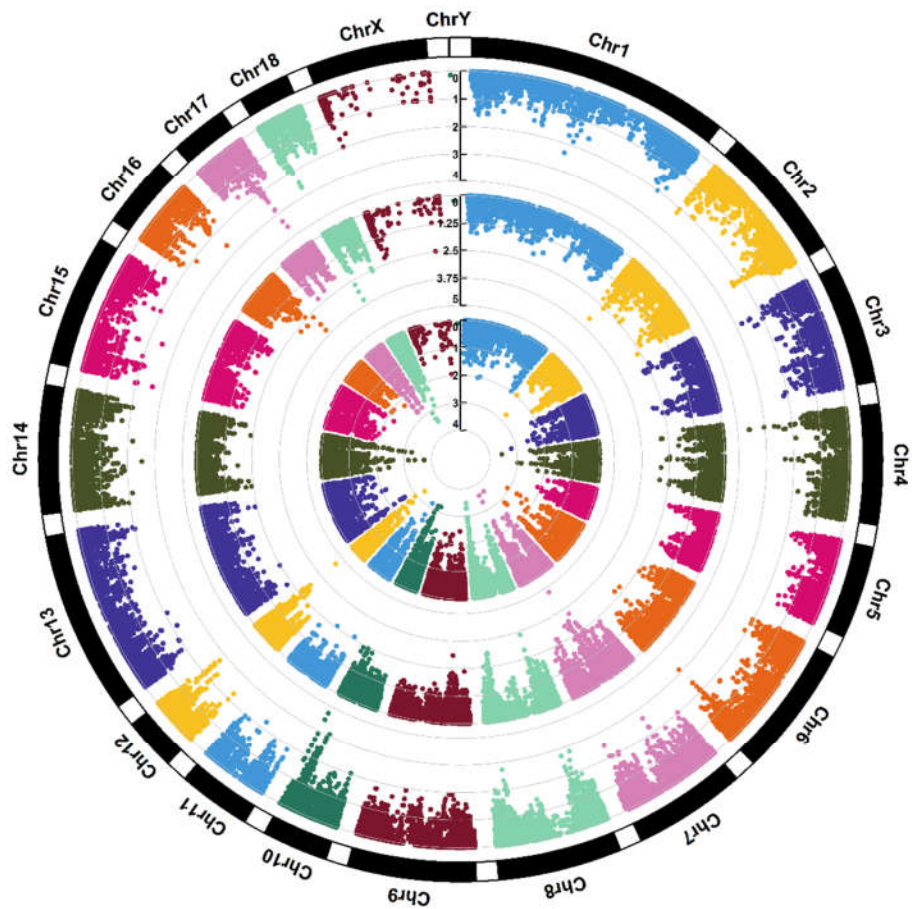

**Supplementary Figure S1.27.** Manhattan plots of genome-wide association for leucyl methionine (M28). Note: Y-axis indicates the  $\log_{10}(p\text{-value})$ . Blue dotted and red solid lines indicate the genome-wide threshold of 0.05 and 0.01 after Bonferroni multiple testing, respectively. The three tracks indicate the metabolites from first sampling time, second sampling time, and combined two sampling times from outside to inside.

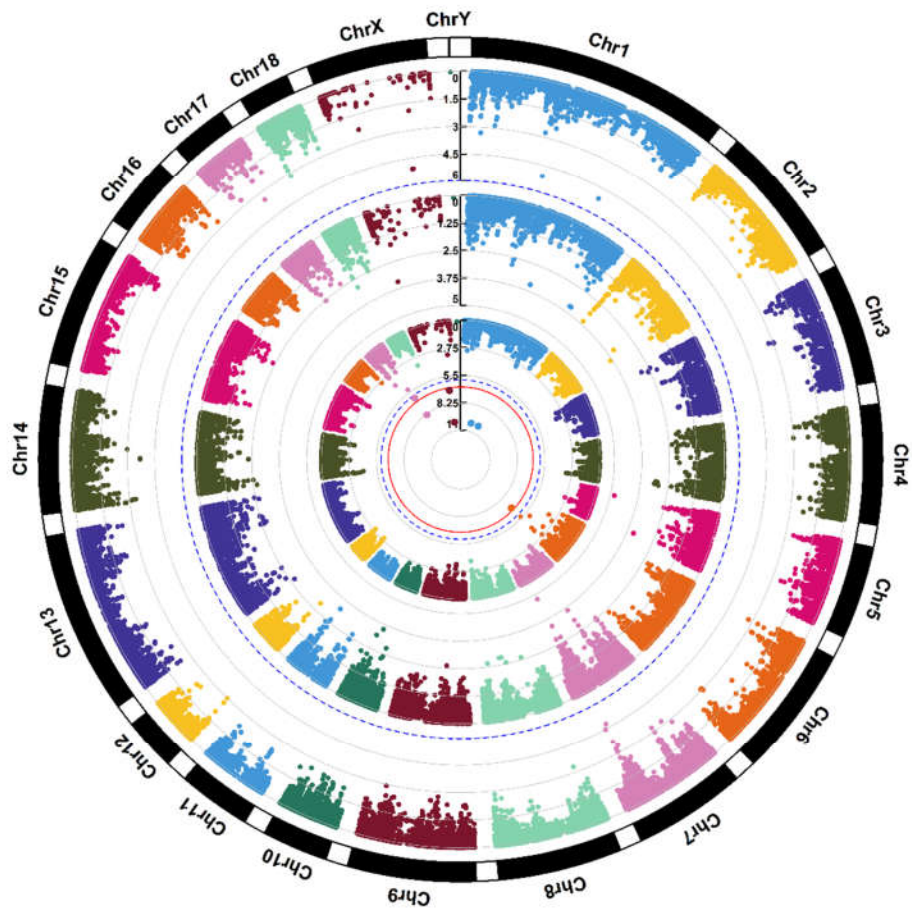

**Supplementary Figure S1.28.** Manhattan plots of genome-wide association for lysoPC(16:0) (M29). Note: Y-axis indicates the  $\log_{10}(p\text{-value})$ . Blue dotted and red solid lines indicate the genome-wide threshold of 0.05 and 0.01 after Bonferroni multiple testing, respectively. The three tracks indicate the metabolites from first sampling time, second sampling time, and combined two sampling times from outside to inside.

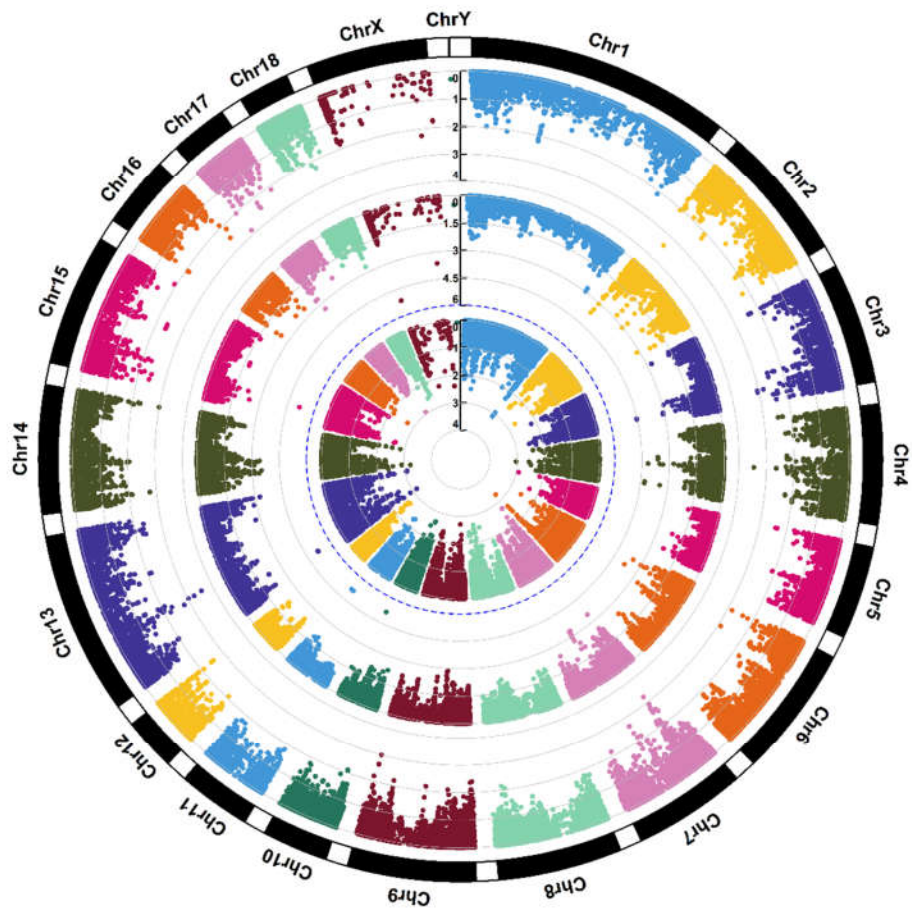

**Supplementary Figure S1.29.** Manhattan plots of genome-wide association for manNAc (M30). Note: Y-axis indicates the  $\log_{10}(p\text{-value})$ . Blue dotted and red solid lines indicate the genome-wide threshold of 0.05 and 0.01 after Bonferroni multiple testing, respectively. The three tracks indicate the metabolites from first sampling time, second sampling time, and combined two sampling times from outside to inside.

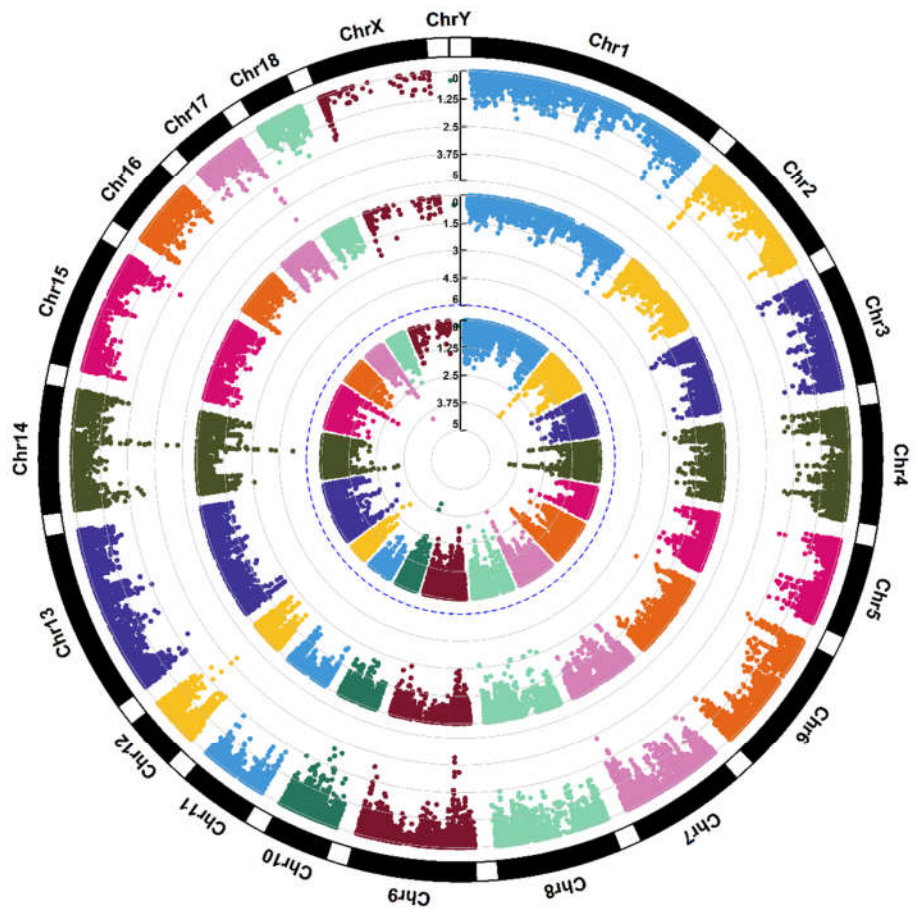

**Supplementary Figure S1.30.** Manhattan plots of genome-wide association for methionine (M31). Note: Y-axis indicates the  $\log_{10}(p\text{-value})$ . Blue dotted and red solid lines indicate the genome-wide threshold of 0.05 and 0.01 after Bonferroni multiple testing, respectively. The three tracks indicate the metabolites from first sampling time, second sampling time, and combined two sampling times from outside to inside.

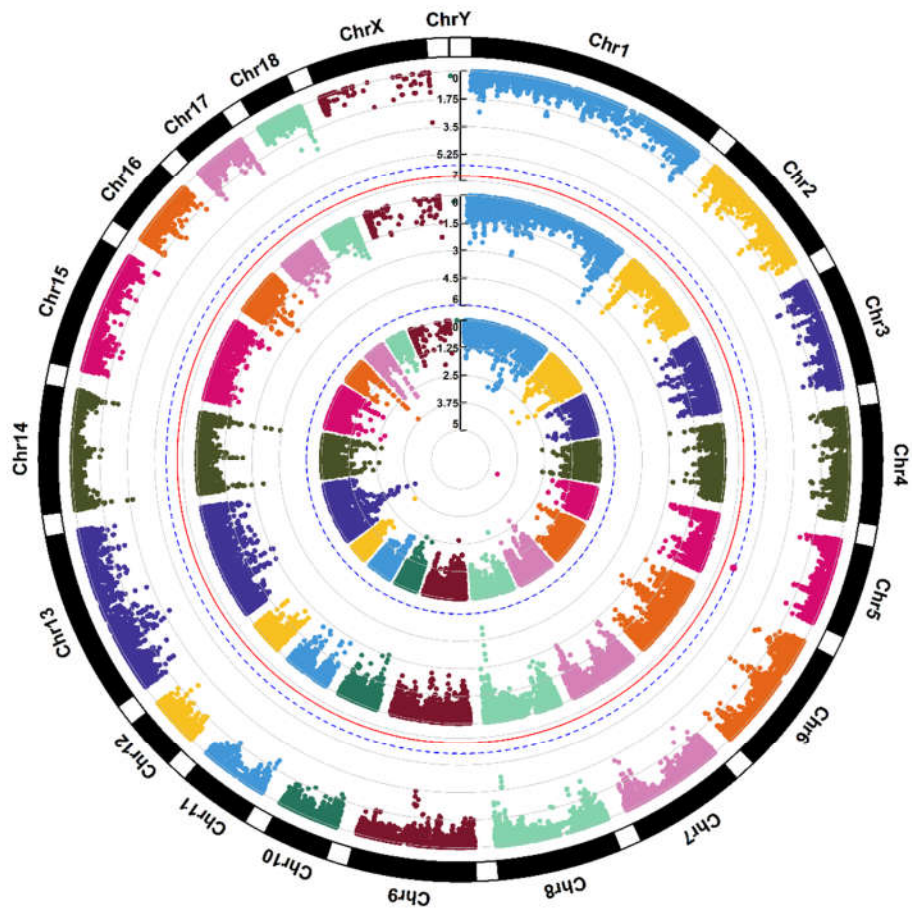

**Supplementary Figure S1.31.** Manhattan plots of genome-wide association for monosaccharide (M32). Note: Y-axis indicates the  $\log_{10}(p\text{-value})$ . Blue dotted and red solid lines indicate the genome-wide threshold of 0.05 and 0.01 after Bonferroni multiple testing, respectively. The three tracks indicate the metabolites from first sampling time, second sampling time, and combined two sampling times from outside to inside.

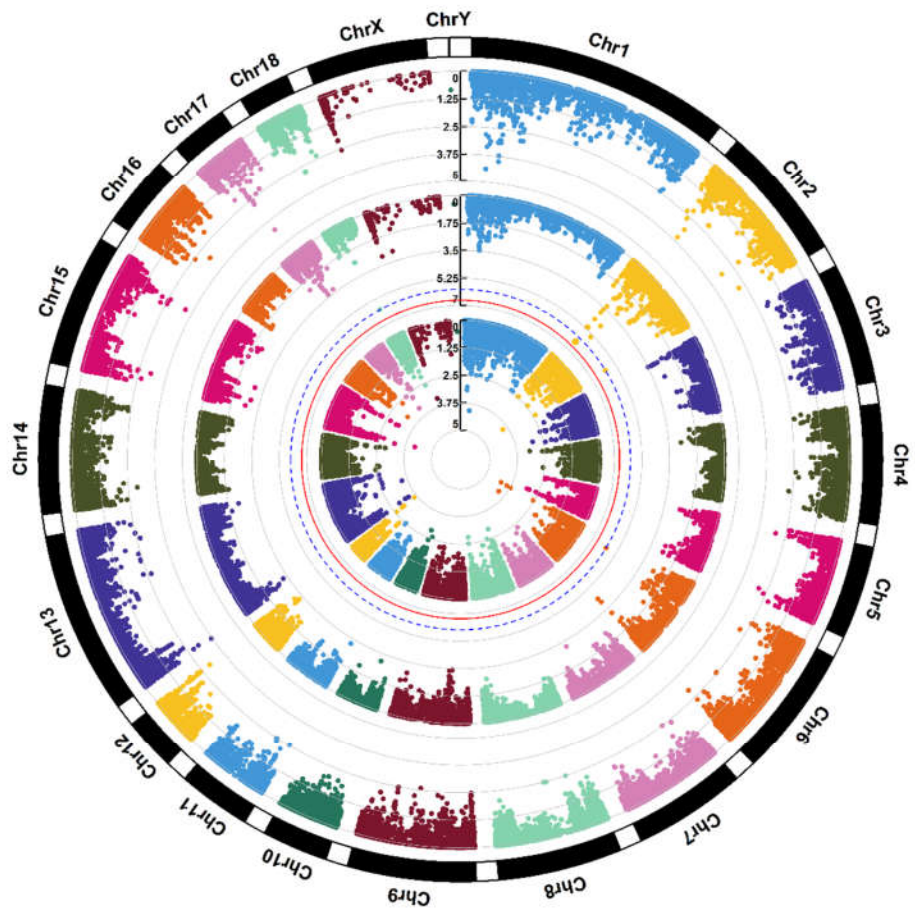

**Supplementary Figure S1.32.** Manhattan plots of genome-wide association for nicotine amide (M33). Note: Y-axis indicates the  $\log_{10}(p\text{-value})$ . Blue dotted and red solid lines indicate the genome-wide threshold of 0.05 and 0.01 after Bonferroni multiple testing, respectively. The three tracks indicate the metabolites from first sampling time, second sampling time, and combined two sampling times from outside to inside.



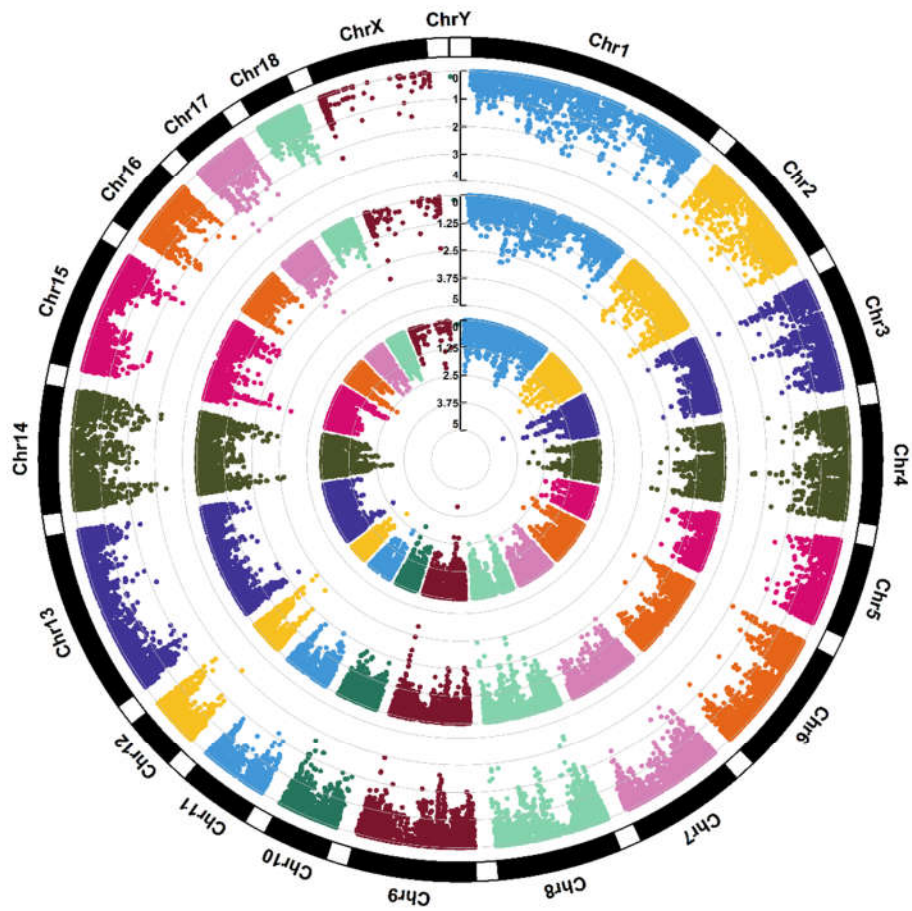

**Supplementary Figure S1.33.** Manhattan plots of genome-wide association for ornithine (M34). Note: Y-axis indicates the  $\log_{10}(p\text{-value})$ . Blue dotted and red solid lines indicate the genome-wide threshold of 0.05 and 0.01 after Bonferroni multiple testing, respectively. The three tracks indicate the metabolites from first sampling time, second sampling time, and combined two sampling times from outside to inside.

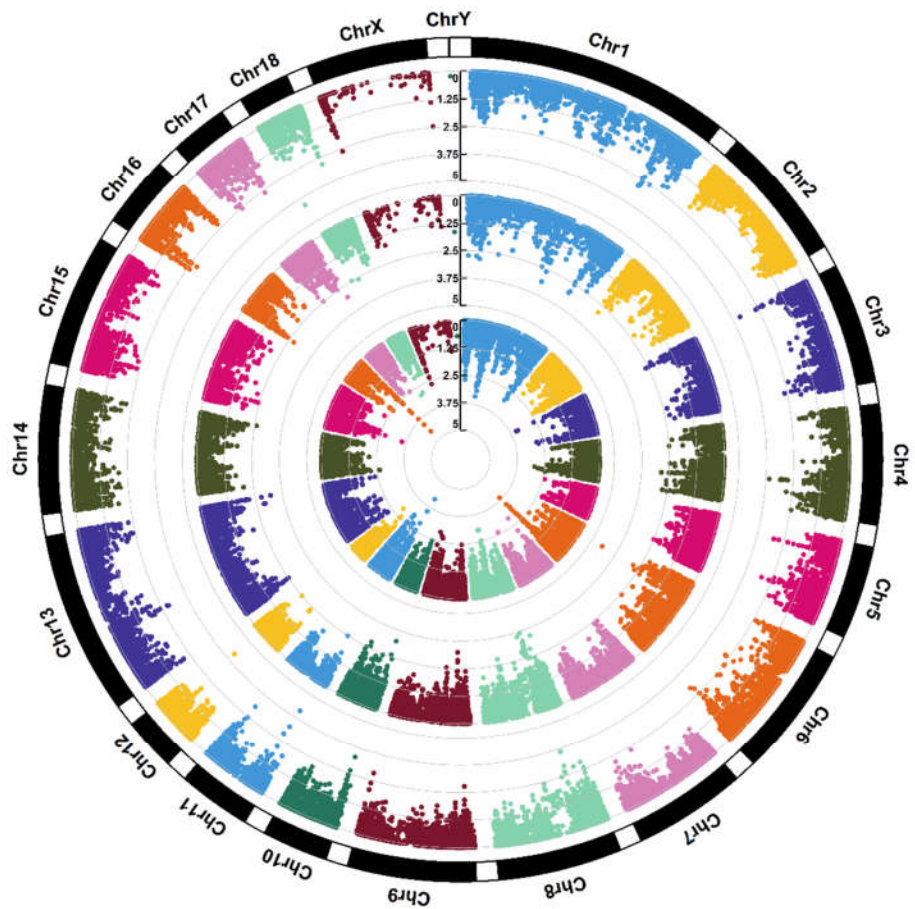

**Supplementary Figure S1.34.** Manhattan plots of genome-wide association for phenylalanine (M35). Note: Y-axis indicates the  $\log_{10}(p\text{-value})$ . Blue dotted and red solid lines indicate the genome-wide threshold of 0.05 and 0.01 after Bonferroni multiple testing, respectively. The three tracks indicate the metabolites from first sampling time, second sampling time, and combined two sampling times from outside to inside.

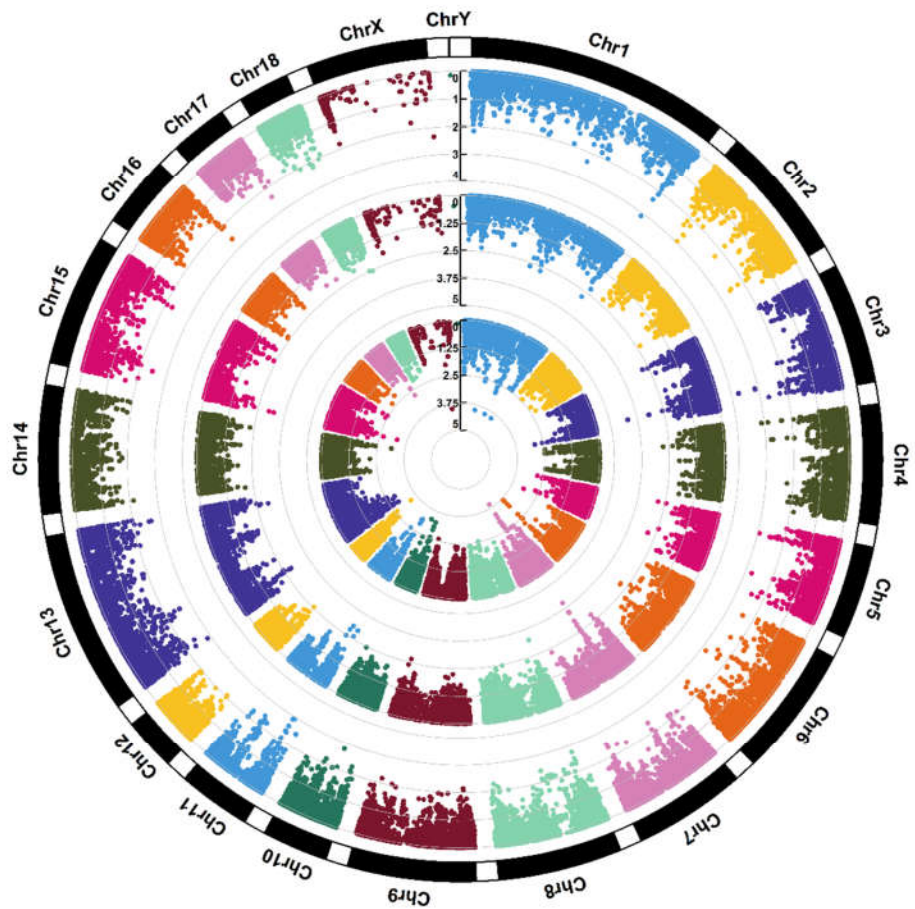

**Supplementary Figure S1.35.** Manhattan plots of genome-wide association for proline (M36). Note: Y-axis indicates the  $\log_{10}(p\text{-value})$ . Blue dotted and red solid lines indicate the genome-wide threshold of 0.05 and 0.01 after Bonferroni multiple testing, respectively. The three tracks indicate the metabolites from first sampling time, second sampling time, and combined two sampling times from outside to inside.

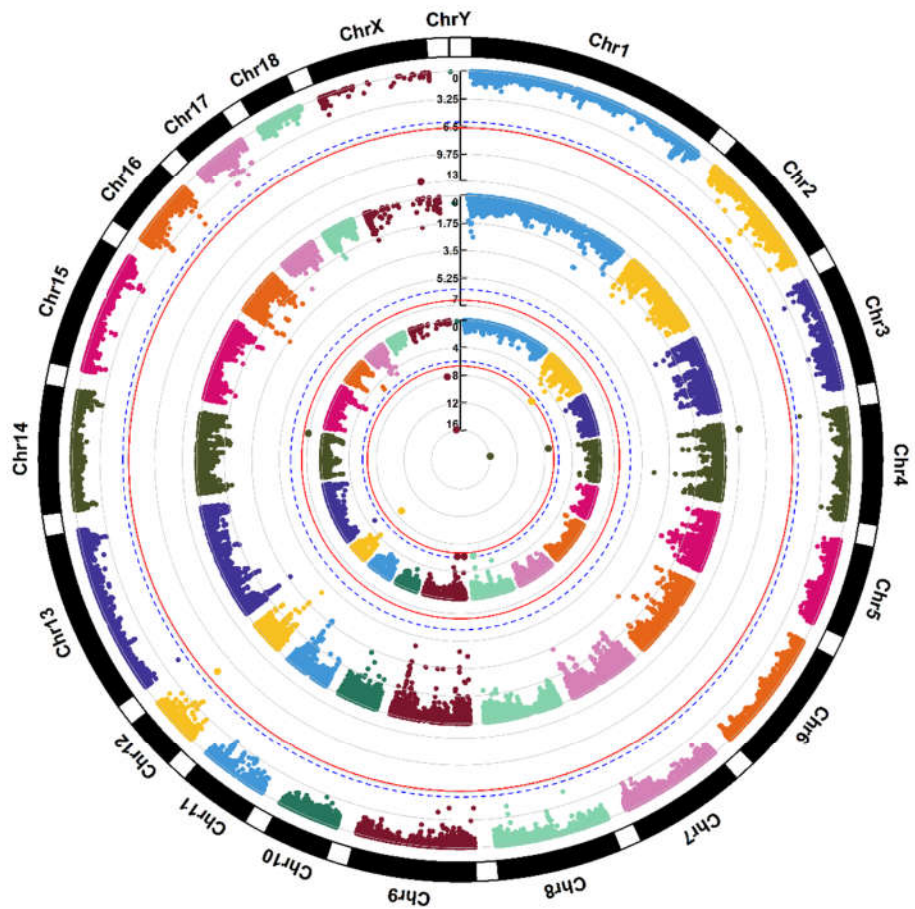

**Supplementary Figure S1.36.** Manhattan plots of genome-wide association for pyruvic acid (M38). Note: Y-axis indicates the  $\log_{10}(p\text{-value})$ . Blue dotted and red solid lines indicate the genome-wide threshold of 0.05 and 0.01 after Bonferroni multiple testing, respectively. The three tracks indicate the metabolites from first sampling time, second sampling time, and combined two sampling times from outside to inside.

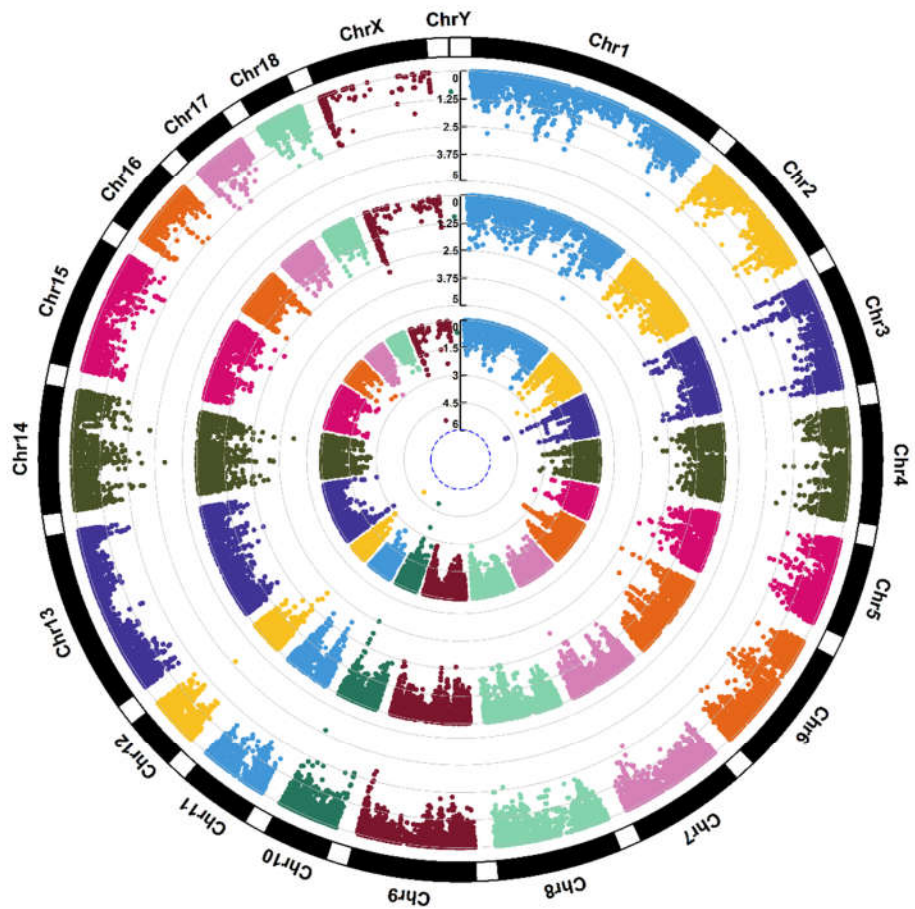

**Supplementary Figure S1.37.** Manhattan plots of genome-wide association for riboflavin (M39). Note: Y-axis indicates the  $\log_{10}(p\text{-value})$ . Blue dotted and red solid lines indicate the genome-wide threshold of 0.05 and 0.01 after Bonferroni multiple testing, respectively. The three tracks indicate the metabolites from first sampling time, second sampling time, and combined two sampling times from outside to inside.

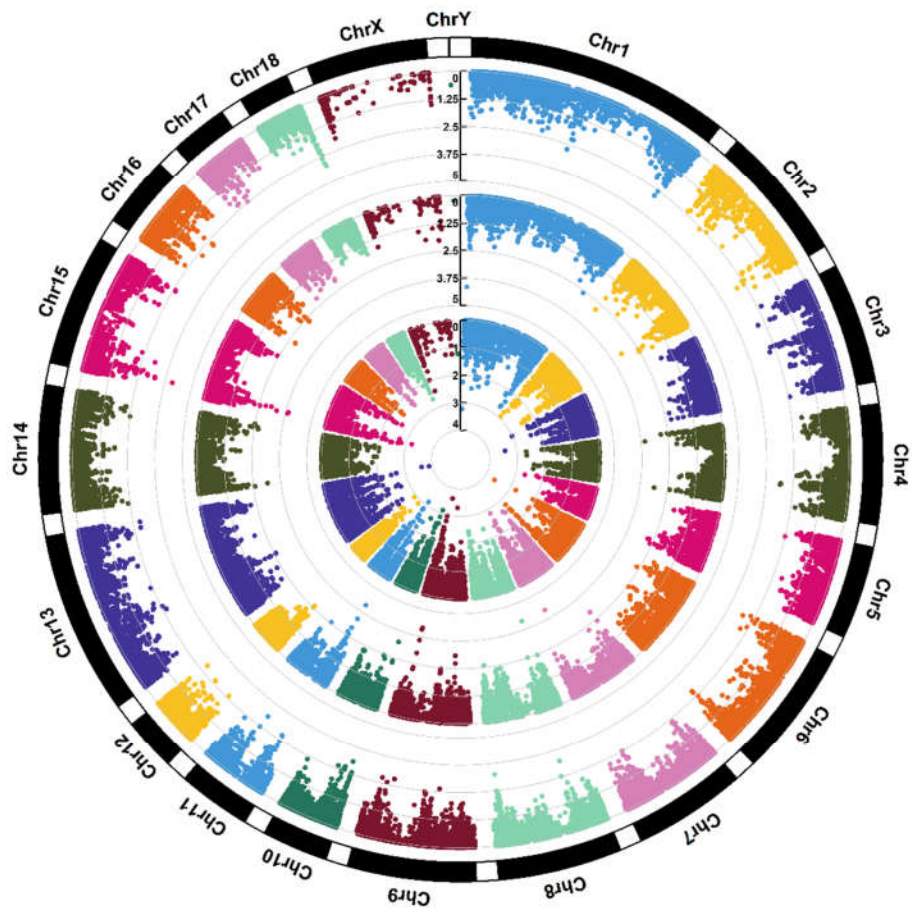

**Supplementary Figure S1.38.** Manhattan plots of genome-wide association for sorbitol (M40). Note: Y-axis indicates the  $\log_{10}(p\text{-value})$ . Blue dotted and red solid lines indicate the genome-wide threshold of 0.05 and 0.01 after Bonferroni multiple testing, respectively. The three tracks indicate the metabolites from first sampling time, second sampling time, and combined two sampling times from outside to inside.

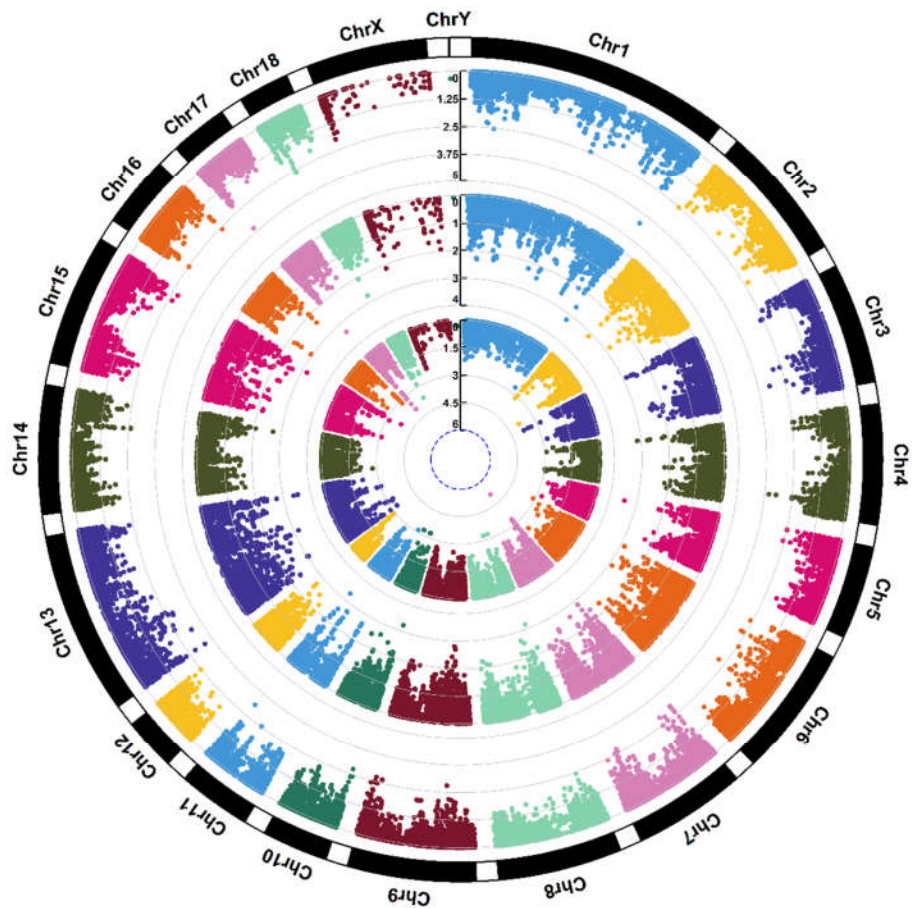

**Supplementary Figure S1.39.** Manhattan plots of genome-wide association for thiamine (M41). Note: Y-axis indicates the  $\log_{10}(p\text{-value})$ . Blue dotted and red solid lines indicate the genome-wide threshold of 0.05 and 0.01 after Bonferroni multiple testing, respectively. The three tracks indicate the metabolites from first sampling time, second sampling time, and combined two sampling times from outside to inside.

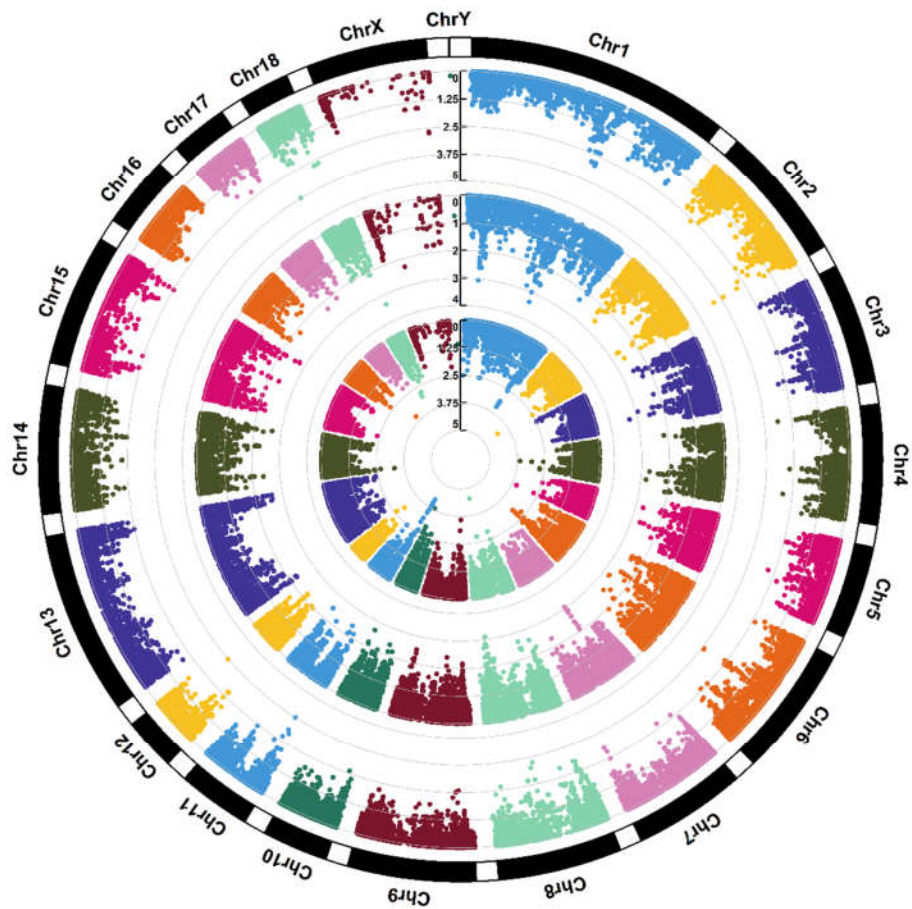

**Supplementary Figure S1.40.** Manhattan plots of genome-wide association for threonine (M42). Note: Y-axis indicates the  $\log_{10}(p\text{-value})$ . Blue dotted and red solid lines indicate the genome-wide threshold of 0.05 and 0.01 after Bonferroni multiple testing, respectively. The three tracks indicate the metabolites from first sampling time, second sampling time, and combined two sampling times from outside to inside.



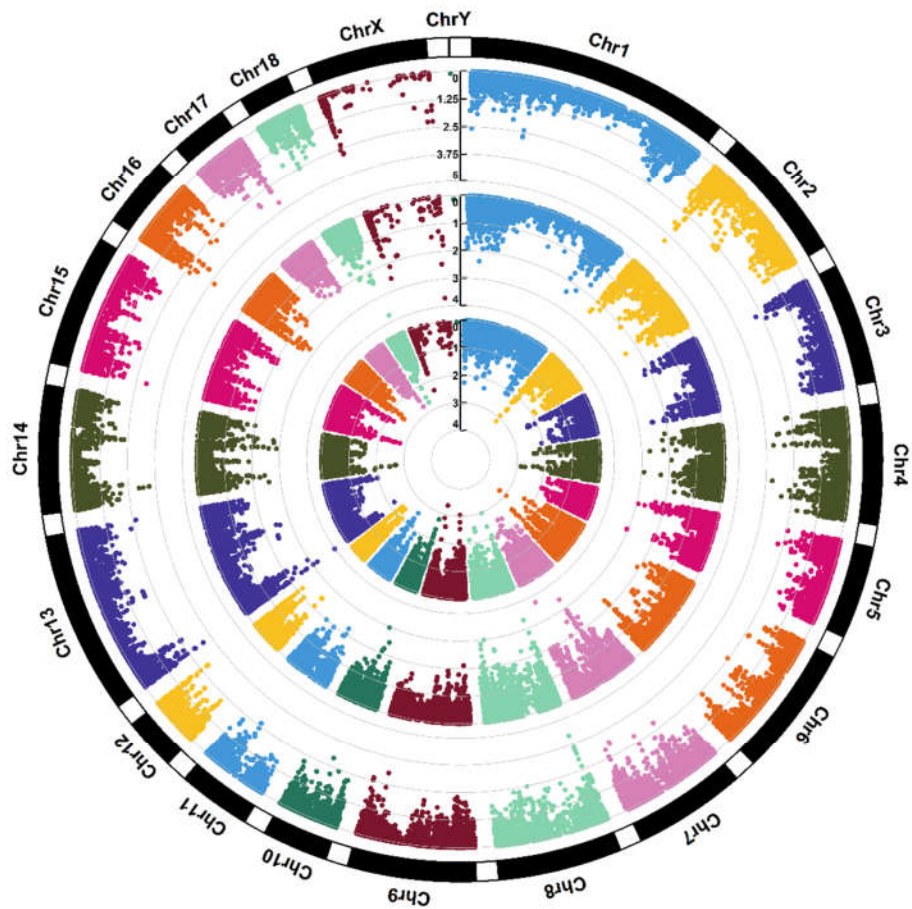

**Supplementary Figure S1.41.** Manhattan plots of genome-wide association for thymidine (M43). Note: Y-axis indicates the  $\log_{10}(p\text{-value})$ . Blue dotted and red solid lines indicate the genome-wide threshold of 0.05 and 0.01 after Bonferroni multiple testing, respectively. The three tracks indicate the metabolites from first sampling time, second sampling time, and combined two sampling times from outside to inside.

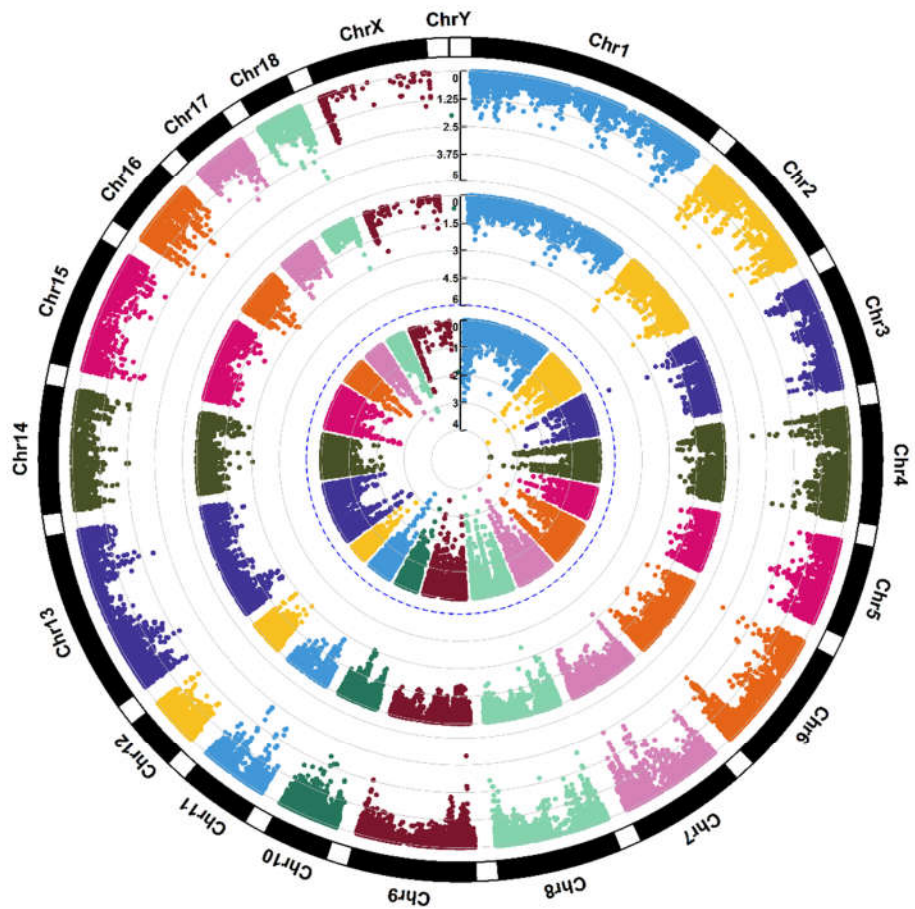

**Supplementary Figure S1.42.** Manhattan plots of genome-wide association for uridine (M44). Note: Y-axis indicates the  $\log_{10}(p\text{-value})$ . Blue dotted and red solid lines indicate the genome-wide threshold of 0.05 and 0.01 after Bonferroni multiple testing, respectively. The three tracks indicate the metabolites from first sampling time, second sampling time, and combined two sampling times from outside to inside.

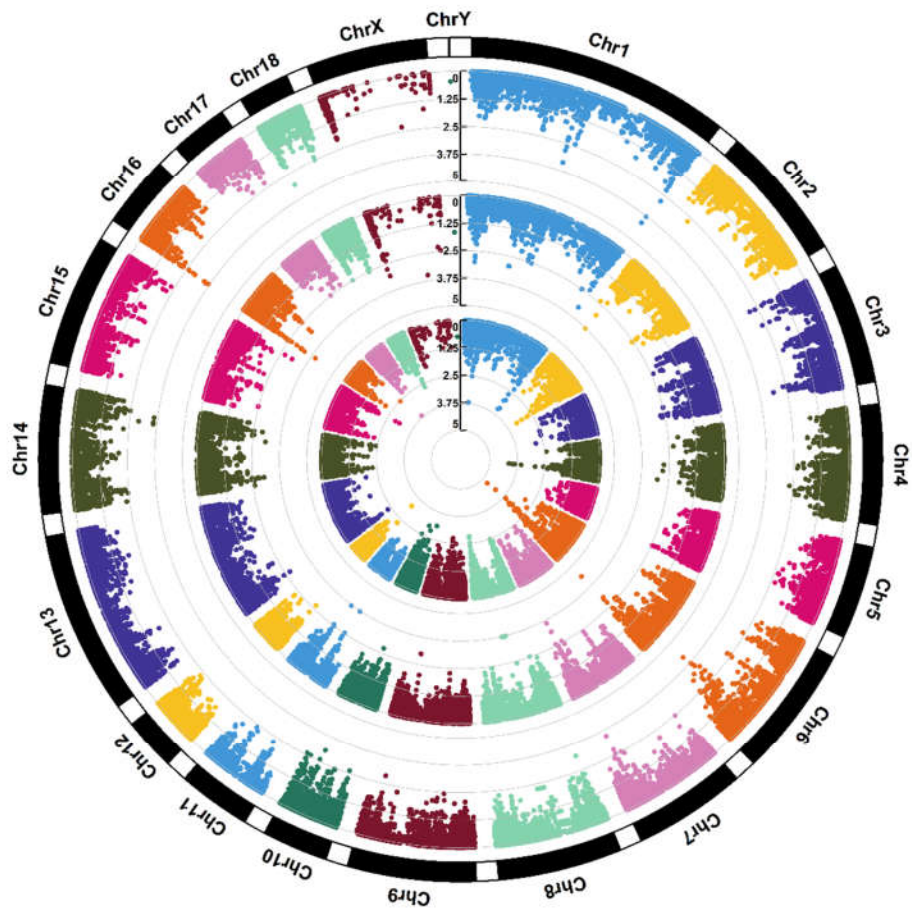

**Supplementary Figure S1.43.** Manhattan plots of genome-wide association for xanthine (M45). Note: Y-axis indicates the  $\log_{10}(p\text{-value})$ . Blue dotted and red solid lines indicate the genome-wide threshold of 0.05 and 0.01 after Bonferroni multiple testing, respectively. The three tracks indicate the metabolites from first sampling time, second sampling time, and combined two sampling times from outside to inside.

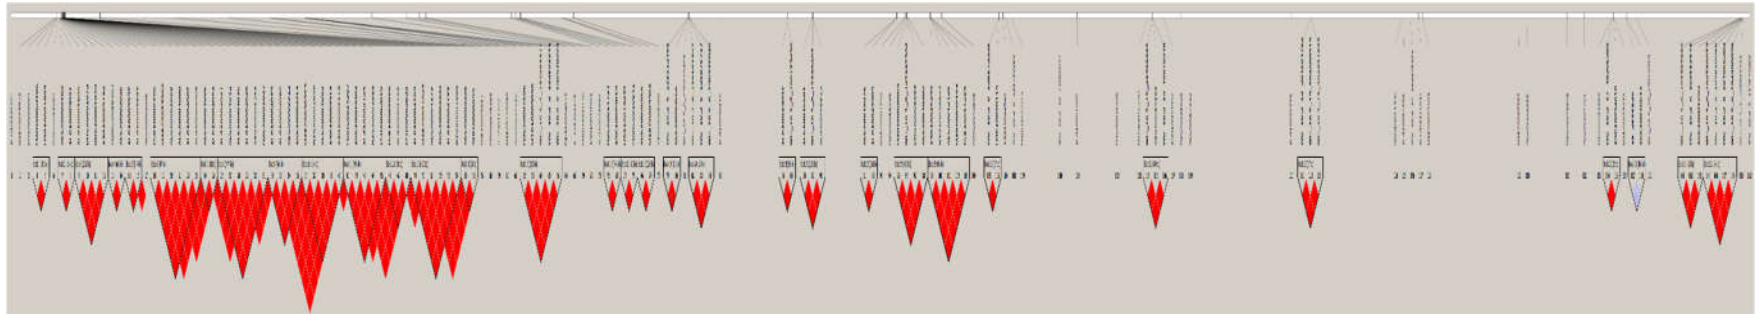

**Supplementary Figure S2.** Linkage disequilibrium (LD) pattern for all significant SNPs. Note: the solid line triangle indicates LD. One square indicates LD level ( $r^2$ ) between two SNPs, and the squares are colored by  $D'$  & LLOR standard scheme.  $D'$  & LLOR standard scheme is that red indicates  $LLOR > 2$ ,  $D' = 1$ ; pink indicates  $LLOR > 2$ ,  $D' < 1$ ; blue indicates  $LLOR < 2$ ,  $D' = 1$ ; and white indicates  $LLOR < 2$ ,  $D' < 1$ . LLOR is the logarithm of likelihood odds ratio and the reliable index to measure  $D'$ .
